# Supplementary material for: Health facility service availability and readiness to provide basic emergency obstetric and newborn care in a low-resource setting: evidence from a Tanzania National Survey
Source: PubMed Central journal article supplement — BMJ Open. 2019 Feb 9;9(2):e020608. doi: 10.1136/bmjopen-2017-020608 (PMC6398731; doi:10.1136/bmjopen-2017-020608), 2019-02-09
Supplement: bmjopen-2017-020608.draft_revisions.pdf [file bmjopen-2017-020608.draft_revisions.pdf]

# BMJ Open

BMJ Open is committed to open peer review. As part of this commitment we make the peer review history of every article we publish publicly available.

When an article is published we post the peer reviewers' comments and the authors' responses online. We also post the versions of the paper that were used during peer review. These are the versions that the peer review comments apply to.

The versions of the paper that follow are the versions that were submitted during the peer review process. They are not the versions of record or the final published versions. They should not be cited or distributed as the published version of this manuscript.

BMJ Open is an open access journal and the full, final, typeset and author-corrected version of record of the manuscript is available on our site with no access controls, subscription charges or pay-per-view fees (<http://bmjopen.bmj.com>).

If you have any questions on BMJ Open's open peer review process please email [info.bmjopen@bmj.com](mailto:info.bmjopen@bmj.com)

# BMJ Open

## Health facility service availability and readiness to provide basic emergency obstetric and newborn care in low-income countries: an evidence from Tanzania national survey

|                                 |                                                                                                                                                                                                  |
|---------------------------------|--------------------------------------------------------------------------------------------------------------------------------------------------------------------------------------------------|
| Journal:                        | <i>BMJ Open</i>                                                                                                                                                                                  |
| Manuscript ID                   | bmjopen-2017-020608                                                                                                                                                                              |
| Article Type:                   | Research                                                                                                                                                                                         |
| Date Submitted by the Author:   | 11-Nov-2017                                                                                                                                                                                      |
| Complete List of Authors:       | Bintabara, Deogratus; The University of Dodoma, Public Health Ernest, Alex; The University of Dodoma, Obstetrics and Gynecology Mpondo, Bonaventura; The University of Dodoma, Internal Medicine |
| <b>Primary Subject Heading</b>: | Health services research                                                                                                                                                                         |
| Secondary Subject Heading:      | Health services research                                                                                                                                                                         |
| Keywords:                       | OBSTETRICS, NEWBORNS, SERVICES AVAILABILITY AND READINESS                                                                                                                                        |
|                                 |                                                                                                                                                                                                  |

SCHOLARONE™  
Manuscripts

Peer Review Only

1  
2  
3  
4  
5  
6  
7  
8  
9  
10  
11  
12  
13  
14  
15  
16  
17  
18  
19  
20  
21  
22  
23  
24  
25  
26  
27  
28  
29  
30  
31  
32  
33  
34  
35  
36  
37  
38  
39  
40  
41  
42  
43  
44  
45  
46  
47  
48  
49  
50  
51  
52  
53  
54  
55  
56  
57  
58  
59  
60

1 **Health facility service availability and readiness to provide basic emergency obstetric and**  
2 **newborn care in low-income countries: an evidence from Tanzania national survey**

3 Deogratus Bintabara<sup>1\*</sup>, Alex Ernest<sup>2</sup>, Bonaventura C.T Mpondo<sup>3</sup>

5 \*Correspondence

6 **Author email addresses:**

7 **DB: bintabaradeo@gmail.com**

8 **AE: ibolinga@gmail.com**

9 **BCM: boniempondo@gmail.com**

For peer review only

## 1 **ABSTRACT**

2 **Objective:** This study aimed to assess the availability of seven signal functions; readiness of the  
3 health facilities to provide basic emergency obstetrics and newborns care; and identifying its  
4 influential factors in low-income countries.

5 **Design:** Health facility-based cross-sectional survey

6 **Setting:** We analysed data for obstetric and newborn care services obtained from the 2014-2015  
7 Tanzania Service Provision Assessment survey, using World Health Organization-Service  
8 Availability and Readiness Assessment tool.

9 **Primary and secondary outcome measures:** Availability of seven signal functions were  
10 measured based on the provision of “parental administration of antibiotic”, “parental  
11 administration of oxytocic,” “parental administration of anticonvulsants,” “assisted vaginal  
12 delivery,” “manual removal of placenta,” “manual removal of retained products or conception,”  
13 and ‘neonatal resuscitation’. Readiness was a composite variable measured based on the  
14 availability of supportive items categorized into three domains; staff training, equipment, and  
15 medicines.

16 **Results:** Out of 1, 188 facilities, 905 (76.2%) reported to provide obstetric and newborn care  
17 services and therefore were included in the analysis of the current study. Overall availability of  
18 seven signal functions and average readiness score were consistently higher among hospitals  
19 than health centers and dispensaries ( $P<0.001$ ). Furthermore, the type of facility, performing  
20 quality assurance, regular reviewing of maternal and newborn deaths, reviewing clients' opinion,  
21 and a number of delivery beds per facility were significantly associated with higher readiness  
22 score.

1  
2  
3 1 **Conclusion:** The study found the variation in availability of seven signal functions and readiness  
4  
5 2 to provide basic emergency obstetric and newborn care among health facilities. The study  
6  
7 3 recommends that quality assurance measures, reviewing clients' opinion and maternal mortality  
8  
9 4 audits should be strengthened to improve availability and readiness to provide basic emergency  
10  
11 5 obstetric and newborns care.  
12  
13

### 14 15 6 **Strengths and limitations of this study**

- 16  
17  
18 7 ➤ This is the first study in this region to identify factors associated with readiness to provide  
19  
20 8 basic emergency obstetric and newborn care using the recommended World Health  
21  
22 9 Organization service readiness indicators, and data obtained from a nationally  
23  
24 10 representative sample.  
25  
26  
27 11 ➤ Using a nationally representative sample nation suggest that our findings accurately  
28  
29 12 reflect the current situation regarding availability and readiness to provide basic  
30  
31 13 emergency obstetric and newborn care in low-income countries.  
32  
33  
34 14 ➤ The findings were adjusted for clustering effect and weighted to correct for complex  
35  
36 15 sampling technique and non- response and disproportionate sampling respectively.  
37  
38  
39 16 ➤ Being a cross-sectional in nature, the causal relationship could not be assessed, therefore,  
40  
41 17 the results should be interpreted with caution.  
42  
43  
44  
45  
46  
47  
48  
49  
50  
51  
52  
53  
54  
55  
56  
57  
58  
59  
60

## 1 INTRODUCTION

2 Maternal mortality ratio (MMR) remains unacceptably high in developing countries.<sup>[1]</sup>  
3 Estimates show that 800 women die daily from maternal complications globally; 99% of all these  
4 deaths have been shown to occur in developing countries.<sup>[2]</sup> Direct obstetric causes are  
5 responsible for 73% of all maternal deaths with hemorrhage being the most common cause  
6 followed by hypertensive disorders and sepsis.<sup>[3]</sup> Despite the substantial decline in global  
7 maternal mortality estimates over the past 15 years,<sup>[4]</sup> recent reports showed a significant  
8 increase of MMR in Tanzania from 454 maternal deaths per 100,000 live births in 2010<sup>[5]</sup> to 556  
9 maternal deaths per 100,000 live births in 2016.<sup>[6]</sup>

10 To reduce these deaths, World Health Organization (WHO) recommends access to skilled  
11 birth attendants and availability of emergency obstetric care (EmOC) services as strategies to  
12 avert maternal deaths.<sup>[2,7]</sup> Evidence suggests that provision of EmOC services is associated with  
13 the reduction in maternal mortality and morbidity<sup>[8]</sup>, especially when provided by skilled birth  
14 attendants.<sup>[9,10]</sup> EmOC refers to interventions offered at health facilities aiming at treating direct  
15 obstetric emergencies which account for vast majority of the maternal deaths.<sup>[11]</sup> The guideline  
16 for EmOC services lists seven different items that constitute the basic emergency obstetric and  
17 neonatal care (BEmONC) services.<sup>[11]</sup> The seven items include; the ability of the facility to  
18 administer parenteral antibiotics, administer uterotonic drugs (parenteral oxytocin), parenteral  
19 anticonvulsants (e.g magnesium sulphate), perform manual removal of placenta, perform  
20 removal of retained products, perform assisted vaginal delivery and perform basic neonatal  
21 resuscitation. Based on these items, facilities are then classified as BEmONC based on their  
22 actual performance of the signal functions in three months. Several studies have been done to  
23 assess the met need for BEmONC, but, the majority of them found low rates of met needs for

1  
2  
3 1 BEmONC.<sup>[8,12,13]</sup> Furthermore, an inverse correlation has been observed between BEmONC  
4  
5 2 services rates and maternal mortality.<sup>[8]</sup>  
6  
7

8 3 BEmONC is among the strategies recommended to reduce MMR in low-income  
9  
10 4 countries.<sup>[14]</sup> Despite the majority of these countries implemented BEmONC strategy yet this  
11  
12 5 region still experience high MMR.<sup>[4,15]</sup> For example, Tanzania developed a number of policies  
13  
14 6 and guidelines as a response from international and regional policies and agreements<sup>[16]</sup> targeting  
15  
16 7 the reduction of maternal deaths, such as the Delhi Declaration of 2005 and Millennium  
17  
18 8 Development Goal 5 and later Sustainable Development goal 3.<sup>[17]</sup> However, the country still  
19  
20 9 reporting high MMR, additionally, there is a limited information regarding the status of the  
21  
22 10 availability and readiness of health facilities to provide BEmONC. This study is therefore aimed  
23  
24 11 at assessing the availability of BEmOC services among health facilities in Tanzania and their  
25  
26 12 readiness to provide BEmONC services as well as its associated factors using WHO Service  
27  
28 13 Availability and Readiness Assessment (SARA) tool.<sup>[18]</sup>  
29  
30  
31  
32  
33  
34  
35  
36  
37  
38  
39  
40  
41  
42  
43  
44  
45  
46  
47  
48  
49  
50  
51  
52  
53  
54  
55  
56  
57  
58  
59  
60





## 1 Measurement of variables

2 Based on our research questions; the current study identified two outcome variables  
3 which were “BEmONC services availability” and “BEmONC services readiness”. These  
4 variables were measured by using the WHO methods of assessing facility service availability and  
5 readiness. Hence, “BEmOC services availability” were measured based on the provision of the  
6 seven services referred as “signal functions” which are “parental administration of antibiotic”,  
7 “parental administration of oxytocic,” “parental administration of anticonvulsants,” “assisted  
8 vaginal delivery,” “manual removal of placenta,” “manual removal of retained products or  
9 conception,” and ‘neonatal resuscitation”. “BEmONC services readiness” was measured based  
10 on the availability of supportive items categorized into three domains (groups) as follows; the  
11 first domain was staff training that had two indicators which were the presence of guidelines and  
12 at least one staff who had received refresher training in delivery and newborns care. The second  
13 domain was equipment which had eleven indicators i.e availability of “emergency transport,”  
14 “sterilization equipment,” “examination light,” “delivery pack,” “suction apparatus,” “manual  
15 vacuum extractor,” “vacuum aspirator or D&C kit,” “neonatal bag and mask,” “delivery bed,”  
16 “Partograph,” and “gloves”. The third domain was medicine and commodities which had eleven  
17 indicators contains essential medicines for delivery and newborn i.e “injectable antibiotic,”  
18 “injectable uterotonic”, “injectable magnesium sulfate”, “injectable diazepam”, “intravenous  
19 fluids,” “skin disinfectant,” “antibiotic eye ointment,” “4% chlorhexidine,” “injectable  
20 gentamicin,” “injectable ceftriaxone,” and “amoxicillin suspension”. The BEmOC service  
21 readiness was then created as a composite score by adding the presence of each indicator, with  
22 equal weight given to each of the domains and each of the indicators within the domains. As the  
23 expected target was 100%, each domain accounted for 33.3% (100%/3) of the total score. The

1 percent for each indicator within the domain was equal to 33.3% divided by the number of  
2 indicators in that domain. The BEmONC service readiness score for each facility was then  
3 calculated by adding the percentages. Facilities with high scores were considered to be better in  
4 readiness to provide BEmONC compared to those with low scores.

5 Explanatory variables; facility location was coded as "0" for urban and "1" for Rural.  
6 The facility type was coded as "0" for clinic or dispensary, "1" for a health center, and "2" for a  
7 Hospital. Managing authority was coded as "0" for a public facility and "1" for the private  
8 facility. Duty schedule for 24 hours was coded as "Yes" for facilities observed having a duty  
9 schedule or call list for 24 hours staff assignment and "No" for facilities that observed not having  
10 a duty schedule or call list for 24 hours staff assignment. Quality assurance was coded as  
11 "performed" for facilities reported routinely carry out quality assurance activities and "not  
12 performed" for facilities that reported not routinely carry out quality assurance activities.  
13 Maternal or newborn deaths were coded as "reviewed" for facilities that conducted regular  
14 reviews of maternal or newborn deaths or near-misses and "not reviewed" for facilities that not  
15 conducted regular reviews of maternal or newborn deaths or near-misses. Clients' opinions was  
16 coded as "reviewed" for facilities reported having a system of determining and reviewing clients'  
17 opinion and "not reviewed" for facilities reported not having a system of determining and  
18 reviewing clients' opinion. A number of staffs and number of beds per facility remained as  
19 discrete quantitative variables.

## 1 **Statistical analysis**

2 Data were analyzed using Stata 14 (StataCorp, College Texas). For all the analyses, the  
3 “svy” set command in Stata was used to adjust for the complex sampling design employed by  
4 TSPA survey. All estimates were weighted to correct for non-response and disproportionate  
5 sampling. In the descriptive analysis, continuous variables were summarized using either mean  
6 (SD) for normally distributed variables or median (IQR) for non-normal distributed variables.  
7 All categorical variables were summarized using proportions and then presented in tables and  
8 graphs. Bivariate and multivariate regression models were fitted to assess the existence of the  
9 association between the outcome variable (BEmONC service readiness) and the explanatory  
10 variables. Before the models fitted the skewness/kurtosis tests for normality was performed by  
11 using "sktest" commands in Stata. The insignificant test statistic obtained indicated that the prior  
12 stated null hypothesis that outcome variable is normally distributed cannot be rejected, hence the  
13 normality assumption was met. Also, multicollinearity, the term refers the condition when the  
14 explanatory variables are correlated to each other was assessed. Since in multiple regressions  
15 analysis, explanatory variables are required to be independent of each other, therefore any  
16 variable with the correlation coefficient of more than 0.3 with others was not included in the  
17 models. Then, all variables which met the previous criteria were subjected to bivariate analysis  
18 and those which were significant at  $P$  value  $< 0.05$  were included in the multivariate analysis  
19 using the stepwise (backward elimination) method to test for the association of each explanatory  
20 variable with the outcome variable. A Pearson's chi-square ( $X^2$ ) test was used to test for  
21 association and its corresponding  $P$ -value of less than 0.05 was considered statistically  
22 significant.

## 23 **Ethics statement**

1  
2  
3 1 This study was based on an analysis of existing public domain survey data sets that are  
4  
5 2 freely available online with all identifier information detached. The survey was approved by the  
6  
7 3 Ethics Committee of the ICF Macro at Calverton in the USA and by the National Institute of  
8  
9 4 Medical Research Ethics Committee in Tanzania. Informed consent was requested and obtained  
10  
11 5 from participants before the interview.  
12  
13

## 14 6 **RESULTS**

### 15 7 **General characteristics of surveyed facilities**

16  
17 8 Out of 1, 188 facilities involved in the TSPA survey, 905 (76.18%) reported to provide  
18  
19 9 delivery and newborns care services and therefore were included in the analysis of the current  
20  
21 10 study. The majority (773, 85.42%) and (751, 83.07%) were from the rural location and were  
22  
23 11 either dispensary or clinic type of facility respectively. Most of the facilities (756, 83.58%) were  
24  
25 12 public facilities. A few (256, 28.27%) and (149, 16.42%) of facilities reported having a duty  
26  
27 13 schedule of 24-hour staff available and routinely performing a quality assurance activities  
28  
29 14 respectively. About one-fifth (182, 20.05%) and one-third (272, 30.03%) of facilities reported  
30  
31 15 regular reviewing maternal, newborn deaths or "near-misses" and reviewing clients opinion  
32  
33 16 about health facility or its services. Overall, the number of staffs and delivery beds per facility  
34  
35 17 was low, with a median (IQR) of 3 (2, 6) and mean (SD) of 1.41 (1.02) respectively (Table 1).  
36  
37  
38  
39  
40  
41  
42  
43  
44  
45  
46  
47  
48  
49  
50  
51  
52  
53  
54  
55  
56  
57  
58  
59  
60

1 **Table 1 Percent distribution of surveyed facilities according to background characteristics,**  
 2 **TSPA 2014-2015 (N=905).**

| Variable                                    | Frequency<br>(n=weighted) | Percentage<br>(%=weighted) <sup>4</sup> |    |
|---------------------------------------------|---------------------------|-----------------------------------------|----|
| <b>Facility location</b>                    |                           |                                         | 5  |
| Rural                                       | 773                       | 85.42                                   |    |
| Urban                                       | 132                       | 14.58                                   | 6  |
| <b>Facility type</b>                        |                           |                                         | 7  |
| Clinic & dispensary                         | 751                       | 83.07                                   | 8  |
| Health center                               | 110                       | 12.10                                   | 9  |
| Hospital                                    | 44                        | 4.83                                    | 10 |
| <b>Managing authority</b>                   |                           |                                         | 11 |
| Public                                      | 756                       | 83.58                                   | 12 |
| Private                                     | 149                       | 16.42                                   | 13 |
| <b>Duty schedule for 24 hours</b>           |                           |                                         | 14 |
| Yes                                         | 256                       | 28.27                                   | 15 |
| No                                          | 649                       | 71.73                                   | 16 |
| <b>Quality assurance</b>                    |                           |                                         | 17 |
| Performed                                   | 149                       | 16.42                                   | 18 |
| Not performed                               | 756                       | 83.58                                   | 19 |
| <b>Maternal/newborn deaths</b>              |                           |                                         | 20 |
| Reviewed                                    | 182                       | 20.05                                   | 21 |
| Not reviewed                                | 723                       | 79.95                                   | 22 |
| <b>Clients' opinions</b>                    |                           |                                         | 23 |
| Reviewed                                    | 272                       | 30.03                                   | 24 |
| Not reviewed                                | 633                       | 69.97                                   | 25 |
| <b>Number of staffs per facility</b>        |                           |                                         | 26 |
| Median (IQR)                                | 3 (2,6)                   |                                         | 27 |
| <b>Number of delivery beds per facility</b> |                           |                                         | 28 |
| Mean (SD)                                   | 1.41 (1.02)               |                                         | 29 |
|                                             |                           |                                         | 30 |
|                                             |                           |                                         | 31 |

32 **IQR: Interquartile range; SD: Standard deviation**

33

34

## 1 **Seven signal functions for BEmONC by type of facility and managing authority**

2 Table 2, shows the distribution of the availability of seven signal function for BEmONC  
3 by type of facility and managing authority. Overall availability of these seven signal functions  
4 (parental administration of the antibiotic, parental administration of oxytocic, parental  
5 administration of anticonvulsant, assisted vaginal delivery, manual removal of placenta, manual  
6 removal of retained products or conception, and neonatal resuscitation) were constitently higher  
7 among hospitals than health centers and dispensaries ( $P<0.001$ ). Despite the fact that private  
8 facilities were consistently reported the higher availability of these seven signal functions  
9 compared to public facilities, only parental administration of the antibiotic, parental  
10 administration of anticonvulsants, and neonatal resuscitation were significant higher in private  
11 facilities ( $P<0.001$ ). Regardless of facility type and managing authority, majority of the facilities  
12 reported high availability of parental administration of oxytocic (83.61%), assisted vaginal  
13 delivery (69.60%), and neonatal resuscitations (52.14%) while less than half of all facilities  
14 reported availailability of manual removal of retained products or conception (35.36%), parental  
15 administration of antibiotic (34.01%), manual removal of placenta (33.95%), and parental  
16 administration of anticonvulsants (13.35%).

1 **Table 2 Percentage distribution of seven signal functions for basic emergency obstetric care**  
 2 **services by type of facility and managing authority (N=905)**

| Variable                                                | Facility type         |                  |          | Managing authority |         | Overall National |
|---------------------------------------------------------|-----------------------|------------------|----------|--------------------|---------|------------------|
|                                                         | Dispensary/<br>Clinic | Health<br>center | Hospital | Public             | Private |                  |
| Parental administration of antibiotic                   | 27.32                 | 60.01            | 83.95*   | 32.04              | 44.03*  | 34.01            |
| Parental administration of oxytocin                     | 81.77                 | 90.94            | 96.86*   | 83.69              | 83.16   | 83.61            |
| Parental administration of anticonvulsants              | 6.96                  | 31.59            | 77.56*   | 10.93              | 25.63*  | 13.35            |
| Assisted vaginal delivery                               | 68.00                 | 72.85            | 88.94*   | 69.50              | 70.11   | 69.60            |
| Manual removal of placenta                              | 30.22                 | 45.34            | 69.66*   | 32.87              | 39.46   | 33.95            |
| Manual removal of retained products of conception       | 31.10                 | 51.35            | 68.56*   | 34.88              | 37.79   | 35.36            |
| Neonatal resuscitation                                  | 46.78                 | 73.05            | 92.03*   | 50.64              | 59.76*  | 52.14            |
| Number of facilities providing normal delivery services | 751                   | 110              | 44       | 756                | 169     | 905              |

3 \* = *P*-value <0.001  
 4

## Availability of important supportive items for delivery and newborns care services

**Human resources (staff training):** Only (206, 22.75%) facilities reported having at least one staff who had received refresher training in delivery and newborns care. Also about one-third (270, 29.80%) of facilities reported having recommended guidelines related to delivery and newborn care.

**Essential equipment and supplies:** Overall, the majority (890, 98.35%) of facilities reported dedicating at least one bed for delivery purposes, (780, 86.24%) having sterile gloves, (760, 84.05%) having delivery packs, and (692, 76.48%) having a neonatal bags and masks. However, less than a quarter of facilities reported having suction apparatus (23.14%), sterilization equipment (20.75%), examination light (14.37%), vacuum aspirator or Dilatation and Curettage D&C kit (7.51%), and manual vacuum extractor (5.31%).

**Medicines and commodities:** Regarding availability of essential medicines for delivery, injectable uterotonic (78.81%), skin disinfectant (61.10%), and injectable diazepam (55.23%) were highly reported. While intravenous fluids (48.15%), injectable magnesium sulfate (40.77%), injectable antibiotic (32.11%) were poorly reported. On the other hand, regarding essential medicines for newborn care, more than half of facilities reported availability of amoxicillin suspension (62.90%) and injectable ceftriaxone (56.69%) while less than one-third of facilities reported availability of injectable gentamicin (29.54%), antibiotic eye ointment (28.05%), and 4% chlorhexidine (11.95%) (Table 3).



1  
2  
3  
4  
5  
6  
7  
8  
9  
10  
11  
12  
13  
14  
15  
16  
17  
18  
19  
20  
21  
22  
23  
24  
25  
26  
27  
28  
29  
30  
31  
32  
33  
34  
35  
36  
37  
38  
39  
40  
41  
42  
43  
44  
45  
46  
47  
48  
49  
50  
51  
52  
53  
54  
55  
56  
57  
58  
59  
60

1  
2  
3

**Table 3 Percentage distribution of readiness indicators for providing basic obstetric and newborn care services (N=905)**

| Variable                                | Frequency<br>(n=weighted) | Percentage<br>(%=weighted) |    |
|-----------------------------------------|---------------------------|----------------------------|----|
| 4                                       |                           |                            |    |
| <b>Staff and training</b>               |                           |                            |    |
| Presence of guidelines                  | 270                       | 29.80                      |    |
| Availability of trained staff           | 206                       | 22.75                      | 6  |
| <b>Equipment and supplies</b>           |                           |                            |    |
| Emergency transport                     | 567                       | 62.54                      | 7  |
| Sterilization equipment                 | 188                       | 20.75                      |    |
| Examination light                       | 130                       | 14.37                      | 8  |
| Delivery pack                           | 760                       | 84.05                      |    |
| Suction apparatus                       | 209                       | 23.14                      |    |
| Manual vacuum extractor                 | 48                        | 5.31                       | 9  |
| Vacuum aspirator or D&C kit             | 68                        | 7.51                       |    |
| Neonatal bag and mask                   | 692                       | 76.48                      |    |
| Delivery bed                            | 890                       | 98.35                      | 10 |
| Partograph                              | 520                       | 57.51                      |    |
| Gloves                                  | 780                       | 86.24                      | 11 |
| <b>Medicines and commodities</b>        |                           |                            |    |
| <b>Essential medicines for delivery</b> |                           |                            |    |
| Injectable antibiotic                   | 291                       | 32.11                      | 12 |
| Injectable uterotonic                   | 713                       | 78.81                      |    |
| Injectable magnesium sulfate            | 368                       | 40.77                      | 13 |
| Injectable diazepam                     | 500                       | 55.23                      |    |
| Intravenous fluids                      | 436                       | 48.15                      |    |
| Skin disinfectant                       | 553                       | 61.10                      | 14 |
| <b>Essential medicines for newborns</b> |                           |                            |    |
| Antibiotic eye ointment                 | 254                       | 28.05                      |    |
| 4% chlorhexidine                        | 108                       | 11.95                      | 15 |
| Injectable gentamicin                   | 267                       | 29.54                      |    |
| Injectable ceftriaxone                  | 513                       | 56.69                      |    |
| Amoxicillin suspension                  | 569                       | 62.90                      | 16 |

17

## 1 **Facility readiness for delivery and newborn care services**

2 Figure 1 shows the average percentage score corresponding to the three domains and the  
3 overall index of facility readiness to provide delivery and newborn care services. None of the  
4 three domains score more than 50% based on the indicators suggested by WHO-SARA manual.  
5 Therefore, overall calculated facility readiness score was low, with the mean (SD) of 40.3 (17.6).

## 6 **Overall readiness score according to type of facility and managing authority**

7 The overall readiness score was found to differ significantly according to the type of  
8 facility, with a higher score at hospitals level than at dispensaries ( $P<0.001$ ). However, there was  
9 no difference in the overall readiness score according to the managing authority at each level of  
10 facility type ( $P>0.05$ ) (Figure 2).

## 11 **Factors associated with facility readiness for providing BEmONC**

12 Table 3 shows results of the bivariate and multivariate analysis, in the bivariate analysis  
13 all explanatory variables show significant association with outcome variable “BEmONC service  
14 readiness” therefore qualified to be included in multivariate analysis. The results of multivariate  
15 analysis show that the readiness for providing BEmONC was higher at health centers (11.54  
16 percentage points better than dispensary and clinics), at facilities which performed quality  
17 assurance (5.45 percentage points better than those not performed), at facilities reported regular  
18 reviewing maternal, newborn deaths or “near-misses” (6.49 percentage points better than those  
19 not reviewed), at facilities that reviewed clients opinion about health facility or its services (4.29  
20 percentage points better than those not reviewed clients opinions), and facility with more  
21 delivery beds (2.44 percentage points for each doubling of bed per facility) (Table 4).

## 1 DISCUSSION

2 This study used a representative data from Tanzania national survey as an example of low  
3 resource countries to assess the availability and readiness of health facilities to provide BEmOC  
4 services among health facilities. The study found a relatively low average score of facilities to  
5 provide BEmONC. Furthermore, it found that type (level) of the facility, performing quality  
6 assurance, regular reviewing of maternal, newborn deaths or near-misses, reviewing clients'  
7 opinion, and more number of delivery beds per facility were significantly associated with higher  
8 readiness to provide BEmONC.

9 Availability of seven signal functions for BEmONC is crucial to reduce maternal and  
10 neonatal mortality.<sup>[19]</sup> The current study found variation in availability of these seven signal  
11 functions according to the type of facility and managing authority. Despite the fact that private  
12 facilities consistently reported the higher availability of the seven signal functions compared to  
13 public facilities, only three signal functions; parental administration of the antibiotic, parental  
14 administration of anticonvulsants, and neonatal resuscitation were significantly more reported in  
15 privately owned than public owned facilities. Similarly, hospitals were found to report  
16 significantly more availability of the signal functions than lower-level facilities (health centers  
17 and dispensaries). These findings are in agreement with the findings of a study conducted in  
18 Haiti in 2014.<sup>[20]</sup> The similarity of the findings of these studies might be due to the similar  
19 methodology used; both studies used data from the national representative sample collected by  
20 DHS program. Therefore, the questionnaire used for the interviews were nearly similar.

21 Facility service readiness is an important aspect of facilities' commitment to ensuring  
22 cumulative availability of components required to provide a specific service <sup>[18]</sup>. The current  
23 study found the relatively low average score of readiness of facilities to provide BEmONC. A

1 similar finding has been observed in the study conducted in Nigeria.<sup>[21]</sup> The similarity of these  
2 studies might be due to similar socio-economic background between these two countries which  
3 are located in sub-Saharan Africa. Additionally, the current study found no difference in overall  
4 readiness of facility to provide BEmOC between public and private facilities. However, the study  
5 found the significant difference of BEmOC readiness according to the type of facility, in which  
6 higher-level facilities (hospitals) were found to have high readiness score compared to lower-  
7 level facilities (dispensaries/clinics). The suboptimal readiness observed in the lower-level  
8 facilities might due to inadequate availability of essential components for providing BEmOC i.e  
9 out of seven signal functions, only two functions were reported available in more than half of  
10 lower-level health facilities, while the remaining five were poorly reported in these facilities. The  
11 finding is in agreement with the previous study conducted in Kenya.<sup>[22]</sup>

12 Quality assurance is an essential process in healthcare, that ensures patient receive a safe  
13 and right care. This process involves the aspect of assessing the services that patients receive by  
14 either measuring or monitoring.<sup>[23]</sup> The current study found that facilities which reported to  
15 perform quality assurance were more likely to have high readiness for BEmOC than facilities  
16 reported not to perform quality assurance. This might be due to the fact that, quality assurance  
17 matched with continuous monitoring and persistent feedback for the purpose of improving  
18 services offered.<sup>[24]</sup> Therefore, based on recommendations from quality assurance teams these  
19 facilities are more likely to improve the availability of services which results in their high  
20 readiness score.

21 Maternal and newborn deaths review is a qualitative, in-depth investigation of the causes  
22 of, and circumstances surrounding these deaths which occur in the health care facilities. Since  
23 each maternal death has a story to tell,<sup>[25]</sup> maternal deaths review is recognized as a widely

1 recommended tool to improve obstetric and neonatal care.<sup>[26]</sup> In agreement with this previous  
2 sentence, the current study found that facilities which performed maternal and newborn death  
3 reviews were more likely to have higher readiness to provide BEmONC than facilities that did  
4 not perform these reviews. This might be due to the fact that the facilities used information  
5 obtained from the reviews as the prerequisite for improving BEmONC service availability and  
6 readiness.

7 Clients' opinions are most beneficial parameter for judging the availability and readiness  
8 of the facility to provide specific services. The current study indicated that the likelihood of  
9 facility readiness to provide BEmONC among facilities that reviewed clients' opinions was  
10 higher than those that did not. This might be explained by the fact that clients' opinions not only  
11 reflects the satisfaction with service received but also provide positive and negative feedback  
12 towards services provided by facility or providers.<sup>[27]</sup> This feedback may be used to correct the  
13 shortcomings highlighted by patients, hence improve the availability of services which are the  
14 important aspect to assess the readiness of the facility.

15 The availability of delivery bed is very important in the health facility as it supports  
16 physiologic birth by allowing women to use many positions, which can facilitate labor  
17 progress.<sup>[28,29]</sup> Therefore, facilities having this type of beds express their commitment towards  
18 the provision of BEmOC. The results from this current study found that facilities with the  
19 increased number of delivery beds were more likely to have the high readiness to provide  
20 BEmOC compared to those without or fewer number of the beds.

21 The strength of the current study is that it analyzed the data with a nationwide  
22 representative sample of health facilities in Tanzania as an example of low resource countries.  
23 The use of such dataset suggests that the findings from this study accurately reflect the current

1 situation regarding availability and readiness of facilities to provide BEmOC in the study setting.  
2 Since TSPA survey employed the complex sampling techniques, the findings were adjusted for  
3 clustering effect and weighted to correct for non-response and disproportionate sampling.  
4 However, the study has some limitations, being a cross-sectional in nature, the causal  
5 relationship could not be assessed, therefore, the results should be interpreted with caution.

6 In summary, the current study found the variation in availability of seven signal functions  
7 and readiness to provide BEmONC among health facilities in Tanzania. It also highlighted the  
8 gaps in the availability of important supportive items such as refresher training and guidelines for  
9 the provision of BEmONC. The study recommends that quality assurance measures and maternal  
10 mortality audits should be strengthened to improve BEmONC. The higher authorities  
11 government through ministry of health should create a conducive working environment by  
12 providing essential guidelines, an uninterrupted supply of medicines, essential equipment such as  
13 delivery beds and providing basic as well as frequent refresher training to health care providers.

#### 14 **Authors affiliations**

15 <sup>1</sup>Department of Public Health, College of Health Sciences, The University of Dodoma

16 <sup>2</sup>Department of Obstetrics and Gynecology, College of Health Sciences, The University of  
17 Dodoma

18 <sup>3</sup>Department of Internal Medicine, College of Health Sciences, The University of Dodoma

#### 19 **Authors' contributions**

20 DB originated the design of the study; DB&BCT performed statistical analysis and interpretation  
21 of data; DB, BCT, and AE drafted the manuscript and critically revised the drafted manuscript.  
22 All authors read and approved the final manuscript.

#### 23 **Acknowledgment**

1  
2  
3 1 We would like to acknowledge ICF International, Rockville, Maryland, USA, through DHS  
4  
5 2 program for giving us permission to access the Tanzania SPA 2014-2015 dataset.  
6  
7

### 8 **Funding**

9  
10 4 This research received no specific grant from any funding agency in the public, commercial or  
11  
12 5 not-for-profit sectors.  
13

### 14 **Competing interest**

15  
16  
17 7 None to declare.  
18

### 19 **Provenance and peer review**

20  
21  
22 9 Not commissioned; externally peer reviewed.  
23

### 24 **A data sharing statement**

25  
26 11 The datasets generated during the current study are available from within the Demographic and  
27  
28 12 Health Survey Program repository: <http://dhsprogram.com/data/available-datasets.cfm>  
29  
30

31 13  
32  
33  
34  
35  
36  
37  
38  
39  
40  
41  
42  
43  
44  
45  
46  
47  
48  
49  
50  
51  
52  
53  
54  
55  
56  
57  
58  
59  
60

1  
2  
3 **1 REFERENCES**  
4  
5

- 6 2 1 Alkema L, Chou D, Hogan D, *et al.* Global , regional , and national levels and trends in  
7 maternal mortality between 1990 and 2015 , with scenario-based projections to 2030 : a  
8 systematic analysis by the UN Maternal Mortality Estimation Inter-Agency Group. *Lancet*  
9 2015;**6736**:1–13. doi:10.1016/S0140-6736(15)00838-7  
10  
11 4  
12  
13 5  
14  
15  
16 6 2 World Health Organization (WHO). Maternal mortality fact sheet. WHO. 2015.  
17  
18  
19 7 3 Say L, Chou D, Gemmill A, *et al.* Global causes of maternal death : a WHO systematic  
20 analysis. *Lancet* 2014;**May**:1–11. doi:10.1016/S2214-109X(14)70227-X  
21  
22 8  
23  
24 9 4 WHO, UNICEF, UNFPA WBG and UNPD. Trends in Maternal Mortality : 1990 to 2015.  
25 2015. doi:ISBN 978 92 4 150363 1  
26  
27 10  
28  
29 11 5 National Bureau of Statistics (NBS) [Tanzania] and ICF Macro. 2011. Tanzania  
30 Demographic and Health Survey 2010. Dar es Salaam, Tanzania: NBS and ICF Macro.  
31  
32 12  
33 13 2011. <https://dhsprogram.com/pubs/pdf/FR243/FR243%5B24June2011%5D.pdf>  
34  
35 14 6 Ministry of Health and Social Welfare (MoHSW) [Tanzania Mainland], Ministry of  
36 Health (MoH) [Zanzibar], National Bureau of Statistics I. Demographic and Health  
37 Survey and Malaria Indicator Survey 2015-2016. 2015.  
38  
39 15  
40 16  
41 17 7 Salam RA, Mansoor T, Mallick D, *et al.* Essential childbirth and postnatal interventions  
42 for improved maternal and neonatal health. *Reprod Health* 2014;**11**:S3. doi:10.1186/1742-  
43 4755-11-S1-S3  
44  
45 18  
46 19  
47 20 8 Holmer H, Oyerinde K, Meara JG, *et al.* The global met need for emergency obstetric  
48 care : a systematic review. 2015;:183–90. doi:10.1111/1471-0528.13230  
49  
50  
51  
52  
53  
54  
55  
56  
57  
58  
59  
60



- 1  
2  
3 1 9 Paxton A, Maine D, Freedman L, *et al.* The evidence for emergency obstetric care.  
4  
5  
6 2 Published Online First: 2005. doi:10.1016/j.ijgo.2004.11.026  
7  
8  
9 3 10 Pearson L, Shoo R. Availability and use of emergency obstetric services : Kenya ,  
10  
11 4 Rwanda , Southern Sudan , and Uganda. 2005;:208–15. doi:10.1016/j.ijgo.2004.09.027  
12  
13  
14 5 11 WHO, UNICEF. Monitoring emergency obstetric care.WHO. 2009.  
15  
16  
17 6 12 Ueno E, Adegoke AA. Skilled Birth Attendants in Tanzania : A Descriptive Study of  
18  
19 7 Cadres and Emergency Obstetric Care Signal Functions Performed. Published Online  
20  
21 8 First: 2014. doi:10.1007/s10995-014-1506-z  
22  
23  
24  
25 9 13 Banke-thomas A, Wright K, Sonoiki O, *et al.* Assessing emergency obstetric care  
26  
27 10 provision in low- and middle-income countries : a systematic review of the application of  
28  
29 11 global guidelines. 2016;1:1–13.  
30  
31  
32  
33 12 14 Bhandari T, Dangal G. Emergency Obstetric Care: Strategy for Reducing Maternal  
34  
35 13 Mortality in Developing Countries. *Nepal J Obstet Gynaecol* 2014;9:8–16.  
36  
37 14 doi:10.3126/njog.v9i1.11179  
38  
39  
40  
41 15 15 Koblinsky M, Moyer CA, Calvert C, *et al.* Quality maternity care for every woman,  
42  
43 16 everywhere: a call to action. *Lancet* 2016;388:2307–20. doi:10.1016/S0140-  
44  
45 17 6736(16)31333-2  
46  
47  
48  
49 18 16 Mkoka DA, Kiwara A, Goicolea I, *et al.* Governing the implementation of Emergency  
50  
51 19 Obstetric Care: experiences of Rural District Health Managers, Tanzania. *BMC Health*  
52  
53 20 *Serv Res* 2014;14:333. doi:10.1186/1472-6963-14-333  
54  
55  
56 21 17 United Nations. *The Sustainable Development Goals Report 2016*. United Nations 2016.  
57  
58  
59  
60

- 1  
2  
3 1 doi:10.18356/3405d09f-en  
4  
5  
6 2 18 Health Statistics and Information Systems, World Health Organization (WHO). Service  
7  
8 3 Availability and Readiness Assessment (SARA): an annual monitoring system for service  
9  
10 4 delivery. 2014. [http://www.who.int/healthinfo/systems/sara\\_reference\\_manual/en/](http://www.who.int/healthinfo/systems/sara_reference_manual/en/)  
11  
12  
13  
14 5 19 WHO, UNICEF, UNFPA, *et al.* *Trends in Maternal Mortality: 1990 to 2013*. WHO. 2014.  
15  
16  
17 6 20 Wang W. Influence of Service Readiness on Us of Facility Delivery Care: A Study  
18  
19 7 Linking Health Facility Data and Population in Haiti [WP114]. *DHS Work Pap No 114*  
20  
21 8 2014.  
22  
23  
24  
25 9 21 Gage AJ, Ilombu O, Akinyemi AI. Service readiness, health facility management practices,  
26  
27 10 and delivery care utilization in five states of Nigeria: a cross-sectional analysis. *BMC*  
28  
29 11 *Pregnancy Childbirth* 2016;**16**:297. doi:10.1186/s12884-016-1097-3  
30  
31  
32  
33 12 22 Measure Evaluation PIMA. Health Facility Readiness to Provide Emergency Obstetric  
34  
35 13 and Newborn Care in Kenya. 2016.  
36  
37  
38 14 23 Maithe E. Fowler. Quality assurance: Definition and Importance. *Plast Surg Nurs*  
39  
40 15 1990;**10**:94–6.  
41  
42  
43 16 24 de Jonge V, Nicolaas JS, van Leerdam ME, *et al.* Overview of the quality assurance  
44  
45 17 movement in health care. *Best Pract Res Clin Gastroenterol* 2011;**25**:337–47.  
46  
47 18 doi:10.1016/j.bpg.2011.05.001  
48  
49  
50  
51 19 25 Lewis G. Beyond the Numbers: reviewing maternal deaths and complications to make  
52  
53 20 pregnancy safer. *Br Med Bull* 2003;**67**:27–37. doi:10.1093/bmb/ldg009  
54  
55  
56  
57  
58  
59  
60

- 1  
2  
3 1 26 Kongnyuy EJ, van den Broek N. The difficulties of conducting maternal death reviews in  
4  
5 2 Malawi. *BMC Pregnancy Childbirth* 2008;**8**:42. doi:10.1186/1471-2393-8-42  
6  
7  
8 3 27 Gupta KS, Rokade V. Importance of Quality in Health Care Sector. *J Health Manag*  
9  
10 4 2016;**18**:84–94. doi:10.1177/0972063415625527  
11  
12  
13  
14 5 28 Stark MA, RemyNSE M, Zwelling E. Importance of the Birth Environment to Support  
15  
16 6 Physiologic Birth. *J Obstet Gynecol Neonatal Nurs* 2016;**45**:285–94.  
17  
18 7 doi:10.1016/j.jogn.2015.12.008  
19  
20  
21  
22 8 29 Zwelling E, Phillips CR. Family-centered maternity care in the new millennium: is it real  
23  
24 9 or is it imagined? *J Perinat Neonatal Nurs* 2001;**15**:1–12.  
25  
26  
27  
28  
29  
30  
31  
32  
33  
34  
35  
36  
37  
38  
39  
40  
41  
42  
43  
44  
45  
46  
47  
48  
49  
50  
51  
52  
53  
54  
55  
56  
57  
58  
59  
60

1  
2  
3 **1 Figure titles/legend**  
4

5 **2 Title; Figure 1 Average score of the three domains of readiness for delivery and newborn**  
6 **3 care services**  
7

8 **4 Legend 1 Note: numbers in brackets “( )” are corresponding standard deviations of the**  
9 **5 mean values**  
10

11  
12 **6 Title; Figure 2 Overall readiness score for providing BEmOC according to type of facility**  
13 **7 and managing authority**  
14

15 **8 Legend 2 Box shows the limits of 25 and 75% percentile. Horizontal line inside the box**  
16 **9 shows the median value. The bar shows the low and upper limits of 95% confidence**  
17 **10 interval. The dots show outliers**  
18  
19  
20  
21  
22  
23

24 11

25  
26 12

27  
28 13

29  
30 14

31  
32 15  
33  
34  
35  
36  
37  
38  
39  
40  
41  
42  
43  
44  
45  
46  
47  
48  
49  
50  
51  
52  
53  
54  
55  
56  
57  
58  
59  
60

1  
2  
3  
4  
5  
6  
7  
8  
9  
10  
11  
12  
13  
14  
15  
16  
17  
18  
19  
20  
21  
22  
23  
24  
25  
26  
27  
28  
29  
30  
31  
32  
33  
34  
35  
36  
37  
38  
39  
40  
41  
42  
43  
44  
45  
46  
47  
48  
49  
50  
51  
52  
53  
54  
55  
56  
57  
58  
59  
60

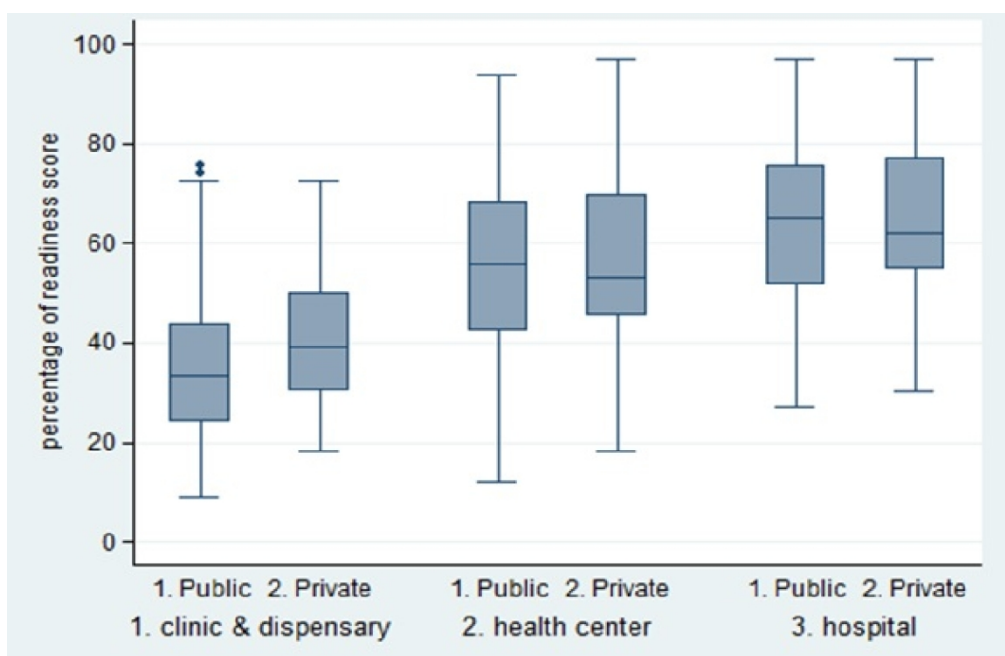

101x65mm (300 x 300 DPI)

# BMJ Open

## Health facility service availability and readiness to provide basic emergency obstetric and newborn care in a low-resource setting: an evidence from Tanzania national survey

|                                 |                                                                                                                                                                                                  |
|---------------------------------|--------------------------------------------------------------------------------------------------------------------------------------------------------------------------------------------------|
| Journal:                        | <i>BMJ Open</i>                                                                                                                                                                                  |
| Manuscript ID                   | bmjopen-2017-020608.R1                                                                                                                                                                           |
| Article Type:                   | Research                                                                                                                                                                                         |
| Date Submitted by the Author:   | 09-Mar-2018                                                                                                                                                                                      |
| Complete List of Authors:       | Bintabara, Deogratus; The University of Dodoma, Public Health Ernest, Alex; The University of Dodoma, Obstetrics and Gynecology Mpondo, Bonaventura; The University of Dodoma, Internal Medicine |
| <b>Primary Subject Heading</b>: | Health services research                                                                                                                                                                         |
| Secondary Subject Heading:      | Health services research                                                                                                                                                                         |
| Keywords:                       | Availability and readiness, Obstetric and newborn care, Low-income countries                                                                                                                     |
|                                 |                                                                                                                                                                                                  |

SCHOLARONE™  
Manuscripts

1  
2  
3 1 **Health facility service availability and readiness to provide basic emergency obstetric and**  
4  
5 2 **newborn care in a low-resource setting: an evidence from Tanzania national survey**  
6  
7

8  
9 3 Deogratus Bintabara<sup>1\*</sup>, Alex Ernest<sup>2</sup>, Bonaventura C. Mpondo<sup>3</sup>

10  
11 4 <sup>1</sup>Department of Public Health, College of Health Sciences, The University of Dodoma,

12  
13 5 <sup>2</sup>Department of Obstetrics and Gynecology, College of Health Sciences, The University of  
14  
15 6 Dodoma, <sup>3</sup>Department of Internal Medicine, College of Health Sciences, The University of

16  
17  
18 7 Dodoma

19  
20 8 **Deogratus Bintabara , M.D.** (Corresponding author)

21  
22 9 Department of Public Health, College of Health Sciences,

23  
24  
25 10 The University of Dodoma, Dodoma, Tanzania

26  
27 11 Phone: (255) 767 966 114, Email: bintabaradeo@gmail.com  
28  
29

30  
31 12 **Alex Ernest, M.D.**

32  
33 13 Department of Obstetrics and Gynecology, College of Health Sciences,

34  
35 14 The University of Dodoma, Dodoma, Tanzania

36  
37 15 Phone: (255) 767 625 828, Email: ibolinga@gmail.com  
38  
39

40  
41 16 **Bonaventura C. Mpondo, M.D.**

42  
43 17 Department of Internal Medicine, College of Health Sciences,

44  
45 18 The University of Dodoma, Dodoma, Tanzania

46  
47 19 Phone: (255) 688 530 690, Email: boniempondo@gmail.com  
48  
49

50  
51 20 **Keywords:** Availability and readidess, Obstetric and newborn care, Low-income countries

52  
53  
54 21 **Word count:** 4769; Abstract 300  
55  
56  
57 22

## 1 ABSTRACT

2 **Objective:** This study used a nationally representative sample from Tanzania as an example of  
3 low-resource setting with a high burden of maternal and newborn deaths, to assess the  
4 availability and readiness of health facilities to provide Basic Emergency Obstetric and Newborn  
5 Care (BEmONC) and its associated factors.

6 **Design:** Health facility-based cross-sectional survey

7 **Setting:** We analyzed data for obstetric and newborn care services obtained from the 2014-2015  
8 Tanzania Service Provision Assessment survey, using World Health Organization-Service  
9 Availability and Readiness Assessment tool.

10 **Primary and secondary outcome measures:** Availability of seven signal functions were  
11 measured based on the provision of "parental administration of antibiotic," "parental  
12 administration of oxytocic," "parental administration of anticonvulsants," "assisted vaginal  
13 delivery," "manual removal of placenta," "manual removal of retained products of conception,"  
14 and 'neonatal resuscitation.'" Readiness was a composite variable measured based on the  
15 availability of supportive items categorized into three domains; staff training, diagnostic  
16 equipment, and basic medicines.

17 **Results:** Out of 1188 facilities, 905 (76.2%) reported to provide obstetric and newborn care  
18 services and therefore were included in the analysis of the current study. Overall availability of  
19 seven signal functions and average readiness score were consistently higher among hospitals  
20 than health centres and dispensaries ( $P<0.001$ ). Furthermore, the type of facility, performing  
21 quality assurance, regular reviewing of maternal and newborn deaths, reviewing clients' opinion,



1 and number of delivery beds per facility were significantly associated with readiness to provide  
2 BEmONC.

3 **Conclusion:** The study found the disparities in the availability and readiness to provide  
4 BEmONC among health facilities in Tanzania. It recommends that, the high authorities through  
5 Ministry of Health to emphasize the health facilities about performing service quality assurance,  
6 maternal and newborns deaths audits on regular basis, also, to consider a fair distribution through  
7 'push' system of clinical guidelines, essential medicines, equipment, and refresher training so  
8 that to improve BEmONC.

### 9 **Strengths and limitations of this study**

- 10 ➤ This is the first study in this region to identify factors associated with readiness to  
11 provide Basic Emergency Obstetric and Newborn Care using the recommended World  
12 Health Organization service readiness indicators, and data obtained from a nationally  
13 representative sample.
- 14 ➤ By using a nationally representative sample, this suggest that our findings accurately  
15 reflect the current situation regarding availability and readiness to provide Basic  
16 Emergency Obstetric and Newborn Care in low-resource setting such as Tanzania.
- 17 ➤ The findings were adjusted for clustering effect and weighted to correct for complex  
18 sampling procedure and non- response and disproportionate sampling respectively.
- 19 ➤ Being a cross-sectional in nature, the causal relationship could not be established,  
20 therefore, the results should be interpreted with caution.
- 21 ➤ Misclassification bias, as a result of arbitrary cut-off point set at 50%, this might  
22 misclassify readiness of health facilities to provide BEmONC.

## 1 INTRODUCTION

2 Despite the evidence revealed a notable global reduction of maternal and neonatal  
3 mortality estimates over the past two decades,<sup>1,2</sup> approximately 800 women and 7700 newborns  
4 still die every day due to maternal complications.<sup>3,4</sup> It is estimated that about 99% of these deaths  
5 are occurring in low and middle-income countries (LMICs)<sup>4</sup>, while 85% are contributed by low-  
6 income countries (LICs) alone.<sup>5,6</sup> Tanzania is amongst the LICs that despite reported increase  
7 coverage of antenatal care provided by skilled provider (96 to 98%), facility delivery (50 to 63%),  
8 and births assisted by skilled providers (51 to 64%) between 2010 to 2016 respectively, yet it  
9 experiencing high burden of maternal and newborn deaths.<sup>7-10</sup> The recent reports showed a  
10 remarkable increase of Maternal Mortality Ratio (MMR) [from 454 to 556 maternal deaths per  
11 100,000 live births], while Neonatal Mortality Ratio (NMR) remained unchanged [26-25 deaths  
12 per 1,000 live births] between 2010 to 2016.<sup>9,10</sup> These estimates are still far from operational  
13 targets set by Ministry of Health through the National Road Map Strategic Plan of 2008, aimed  
14 to accelerate reduction of maternal deaths to 193 per 100000 live-births and neonatal deaths to  
15 19 per 1000 live births in Tanzania, that would have been achieved by the end of 2015.<sup>11</sup> Also,  
16 bring questions whether the country will be able to achieve the Sustainable Development Goal  
17 (SDG) number 3 at the end of 2030.<sup>12</sup>

18 This highlighted slow pace towards reduction of MMR and NMR observed in LIC such  
19 Tanzania, led World Health Organization (WHO) and other global initiative agencies to develop  
20 and recommend the availability of Basic Emergency Obstetric and Newborn care (BEmONC)  
21 services in each health facility as amongst strategies to narrow disparities in global maternal and  
22 newborn deaths.<sup>4,13-15</sup> The BEmONC is defined as an integrated strategy that aims at equipping  
23 health facilities to deal with major causes of direct obstetric emergencies which account for vast

1 majority of the maternal and newborn deaths, particularly in high mortality countries.<sup>16,17</sup> This  
2 strategy is the package of a set of seven key obstetric services or “signal functions” includes; the  
3 ability of the facility to administer parenteral antibiotics, administer uterotonic drugs (parenteral  
4 oxytocin), parenteral anticonvulsants (e.g magnesium sulphate), perform manual removal of  
5 placenta, perform removal of retained products, perform assisted vaginal delivery and perform  
6 basic neonatal resuscitation. Although the evidence revealed that provision of BEmONC under  
7 skilled personnel resulting to better maternal and newborn outcomes,<sup>18</sup> Tanzania and other LICs  
8 implemented this strategy, yet the majority of their health facilities lack some or all seven signal  
9 functions of BEmONC.<sup>18–20</sup> For example in Tanzania, the finding from national BEmONC  
10 assessment survey of 2015 revealed that 13% of dispensaries, 28% of all health centres and 62%  
11 of hospitals were capable of performing all seven signal functions.<sup>21</sup> These estimates are below  
12 the target that require all hospitals and at least 70% of health centres and dispensaries to provide  
13 BEmONC services.<sup>22</sup> Also, it is contrary to the effort made by Tanzanian government on  
14 improving maternal and newborn health such as developing number of policies and guidelines,  
15 as a response from international and regional policies and agreements (Delhi Declaration of  
16 2005), that targets to reduce MMR and NMR.<sup>11,22,23</sup>

17 Based on previous reports it seems the countries with low availability of BEmONC  
18 services also have the higher burden of maternal and newborn deaths.<sup>1,24</sup> This observed  
19 correlation has been documented by the previous study and brought attention to many  
20 researchers to identify and address the critical gaps on BEmONC, that could reduce the burden  
21 of high MMR and NMR in those countries.<sup>18,25</sup> However, the majority of previous studies have  
22 concentrated on the assessment of the availability of services and few go-ahead to assess the  
23 readiness of the facilities to provide BEmONC services.<sup>26–30</sup> Despite these studies found

1 suboptimal availability and/or readiness of BEmONC, no one examined the factors associated  
2 with that observed suboptimal. To understand the factors associated with facility readiness to  
3 provide BEmONC is not only a step towards strengthening the maternal and newborn health but  
4 also a crucial area of study, as there is obviously limited empirical evidence regarding it. The  
5 present study is, therefore, using a nationally representative sample from Tanzania as an example  
6 of LICs to assess the current extent of availability and readiness of health facilities to provide  
7 BEmONC services and its associated factors according to the type of facility and managing  
8 authority by using WHO Service Availability and Readiness Assessment (SARA) manual.<sup>31</sup> The  
9 findings from this study will provide a road for policy-makers, administrators, and researchers  
10 not only in Tanzania but also to the other LICs on important factors that need to be addressed  
11 towards strengthening the BEmONC services.



## 1 **Data collection methods**

2           The 2014-2015 TSPA used four main types of questionnaires during data collection,  
3 however, the current analysis used data collected by Facility Inventory questionnaire and one  
4 variable regarding staff training from Health Provider questionnaire. After pre-testing of the  
5 questionnaires, the finalized and corrected versions were used in the main 2014-2015 TSPA  
6 survey data collection between October 20, 2014 – February 21, 2015, and revisit of some  
7 facilities that were not covered previous were conducted from March 2-13, 2015. The data  
8 collection were performed by 67 nurses who were trained for about four weeks and qualified the  
9 series of practical tests and examinations to be interviewers. Following the training, 20 teams  
10 were formed (2 for Zanzibar and 18 for Tanzania Mainland). Each team consisted of a team  
11 leader, 3 interviewers and a driver. On average, for each team data collection process took one  
12 day to a small facility (dispensary clinics and some health centres) and two or three days for  
13 large facilities (mostly hospitals). All collected data concern the health facility service  
14 availability and readiness were provided by the manager, the person-in-charge of the facility, or  
15 the most senior health worker responsible for the client services present at the facility, and  
16 finally, the interviewers observed and verified the presence of valid or functioning reported  
17 supplies.

## 18 **Measurement of variables**

19           Based on our research questions; the current study identified two outcome variables  
20 which were “BEmONC services availability” and “BEmONC services readiness”. These  
21 variables were measured by using the WHO methods of assessing facility service availability and  
22 readiness. Hence, “BEmOC services availability” were measured based on whether the  
23 following seven signal functions have ever been carried out by providers as part of their work

1 within facility at least once during the past 3 months: “parental administration of antibiotic,”  
2 “parental administration of oxytocic,” “parental administration of anticonvulsants,” “assisted  
3 vaginal delivery,” “manual removal of placenta,” “manual removal of retained products of  
4 conception,” and ‘neonatal resuscitation.’ “BEmONC services readiness” was measured based  
5 on the availability and functioning of supportive items categorized into three domains (groups)  
6 as follows; the first domain was staff training that had two indicators which were the presence of  
7 guidelines and at least one staff who had received any formal or structured in-service training  
8 (refresher training) related to the services offered in the 24 months preceding the assessment.

9         The second domain was diagnostic equipment which had eleven indicators i.e presence of  
10 “emergency transport,” “sterilization equipment,” “examination light,” “delivery pack,” “suction  
11 apparatus,” “manual vacuum extractor,” “vacuum aspirator or D&C kit,” “neonatal bag and  
12 mask,” “delivery bed,” “Partograph,” and “gloves.” The third domain was basic medicine and  
13 commodities which had eleven indicators contains essential medicines for delivery and newborn  
14 i.e “injectable antibiotic,” “injectable uterotonic,” “injectable magnesium sulfate,” “injectable  
15 diazepam,” “intravenous fluids,” “skin disinfectant,” “antibiotic eye ointment,” “4%  
16 chlorhexidine,” “injectable gentamicin,” “injectable ceftriaxone,” and “amoxicillin suspension.”  
17 The BEmOC service readiness was then created as a composite score by adding the presence of  
18 each indicator, with equal weight given to each of the domains and each of the indicators within  
19 the domains. As the expected target was 100%, each domain accounted for 33.3% (100%/3) of  
20 the total score. The percent for each indicator within the domain was equal to 33.3% divided by  
21 the number of indicators in that domain. The BEmONC service readiness score for each facility  
22 was then calculated by adding the percentages. Given that the readiness score is a relative  
23 measurement, then facilities that scored 50% or more were considered to be ready to provide

1 BEmONC services than those scored less than 50% in BEmONC readiness score. This cut-off  
2 point of 50% was also used in previous studies.<sup>33,34</sup>

3 Potential explanatory variables; the outcome variables were examined against the  
4 selected potential explanatory variables that we thought they are relevant in influencing the  
5 availability or readiness of the health facility to provide BEmONC services. These variables  
6 were: facility location (urban or rural); facility type (hospital, health centre, clinic or  
7 dispensary); managing authority (public or private); duty schedule or call list for 24 hours, we  
8 included this variable because delays in receiving of healthcare during an emergency is  
9 associated with a long waiting to meet with health providers, therefore, we wanted to assess  
10 whether having duty schedule is related to BEmONC readiness; quality assurance, it is used to  
11 assess the quality of service provided by measuring or monitoring to ensure the patient receives a  
12 safe and right care,<sup>35</sup> therefore we included this variable to assess whether performing quality  
13 assurance is related with BEmONC readiness; regular reviews of maternal and newborn deaths  
14 or near-misses cases, since each maternal or newborn death has a story to tell, an in-depth  
15 investigation of their causes and circumstances surround might improve the maternal and  
16 newborn services,<sup>36</sup> also reviewing clients' opinions, helps to identify weakness and inefficiency  
17 in the provision of healthcare services, and eliminate them will make the facility to meet the  
18 patients' demands at the highest levels of satisfaction, therefore, we wanted to assess whether  
19 these reviews have any influence on BEmONC readiness; number of staffs, scaling up number of  
20 health providers has been related to provision of quality health services,<sup>37</sup> hence facilities with  
21 many providers might have high BEmONC readiness than others, and finally, number of  
22 delivery beds per facility, we thought that shortage of medical supplies such as delivery beds can



1  
2  
3 1 compromise the capacity of facility to provide BEmONC,<sup>38</sup> hence we included this variable in  
4  
5 2 our analysis.  
6  
7

### 8 3 **Statistical analysis**

9  
10 4 Data were analyzed using Stata 14 (StataCorp, College Texas). For all the analyses, the  
11  
12 5 “svy” set command in Stata was used to adjust for the complex sampling design employed by  
13  
14 6 TSPA survey so that to obtain the accurate point estimates and their corresponding standard  
15  
16 7 errors. All estimates were weighted to correct for non- response and disproportionate sampling.  
17  
18 8 In the descriptive analysis, continuous variables were summarized using either mean (SD) for  
19  
20 9 normally distributed variables or median (IQR) for non-normal distributed variables. All  
21  
22 10 categorical variables were summarized using proportions and then presented in tables and  
23  
24 11 graphs. Bivariate and multivariate regression models were fitted to assess the existence of the  
25  
26 12 association between the outcome variable (BEmONC service readiness) and the explanatory  
27  
28 13 variables. Before the models fitted the skewness/kurtosis tests for normality was performed by  
29  
30 14 using "sktest" commands in Stata. The insignificant test statistic obtained indicated that the prior  
31  
32 15 stated null hypothesis that outcome variable is normally distributed cannot be rejected, hence the  
33  
34 16 normality assumption was met. Then, all variables that met the previous criteria were subjected  
35  
36 17 to bivariate analysis and those with a *P*-value < 0.05 were included in the multivariate analysis to  
37  
38 18 test for the association of each explanatory variable with the outcome variable. As the aim was to  
39  
40 19 fit a final model that predicts well the association, the objective criterion-based method was used  
41  
42 20 to include or exclude variable in the multiple regression models. A Pearson’s chi-square ( $X^2$ ) test  
43  
44 21 was used to test for association and its corresponding *P*-value of less than 0.05 was considered  
45  
46 22 statistically significant. A multicollinearity, the term refers the condition when the explanatory  
47  
48 23 variables are correlated to each other in multiple regression models while in fact they are  
49  
50  
51  
52  
53  
54  
55  
56  
57  
58  
59  
60

1 supposed to be independent has been assessed. The generalized variance inflation factor (VIF)  
2 was performed to test for multicollinearity, which usually should not exceed 5. In this analysis  
3 each variable presented with  $VIF < 2.0$ , suggesting the absence of multicollinearity in the final  
4 model.

### 5 **Ethics statement**

6 This study was based on an analysis of existing public domain survey data sets that are  
7 freely available online with all identifier information detached. The survey was approved by the  
8 Ethics Committee of the ICF Macro at Calverton in the USA and by the National Institute of  
9 Medical Research Ethics Committee in Tanzania. Informed consent was requested and obtained  
10 from participants before the interview.

### 11 **Patient and Public Involvement Statement**

12 Patient and public were not involved in the analysis of this study.

## 13 **RESULTS**

### 14 **General characteristics of surveyed facilities**

15 Table 1 presents a summary of the general characteristics of the included health facilities.  
16 Out of 1188 facilities involved in the TSPA survey, 905 (76.18%) reported to provide delivery  
17 and newborns care services and therefore were included in the analysis of the current study.  
18 More than 80% of the facilities were located in the rural area, and publicly owned, while less  
19 than 30% of the facilities regularly reviewed maternal and newborn deaths or "near-misses"  
20 cases occurred within the facility. Overall, the number of staffs per facility was low with a  
21 median (IQR) of 3 (2 - 6).

1 **Table 1 Percent distribution of surveyed facilities according to background characteristics,**  
 2 **TSPA 2014-2015 (N=905).**

| Variable                                    | Frequency<br>(n) weighted | Percentage<br>[95% CI] |
|---------------------------------------------|---------------------------|------------------------|
| <b>Facility location</b>                    |                           |                        |
| Rural                                       | 773                       | 85.42 [82.32-88.05]    |
| Urban                                       | 132                       | 14.58 [11.95-17.68]    |
| <b>Facility type</b>                        |                           |                        |
| Clinic & dispensary                         | 751                       | 83.07 [82.50-83.62]    |
| Health center                               | 110                       | 12.10 [11.95-12.26]    |
| Hospital                                    | 44                        | 4.83 [4.25-5.48]       |
| <b>Managing authority</b>                   |                           |                        |
| Public                                      | 756                       | 83.58 [80.02-86.61]    |
| Private                                     | 149                       | 16.42 [13.39-19.68]    |
| <b>Duty schedule for 24 hours</b>           |                           |                        |
| Yes                                         | 256                       | 28.27 [25.01-31.77]    |
| No                                          | 649                       | 71.73 [68.23-74.99]    |
| <b>Quality assurance</b>                    |                           |                        |
| Performed                                   | 149                       | 16.42 [13.60-19.69]    |
| Not performed                               | 756                       | 83.58 [80.31-86.40]    |
| <b>Maternal/newborn deaths</b>              |                           |                        |
| Reviewed                                    | 182                       | 20.05 [17.13-23.33]    |
| Not reviewed                                | 723                       | 79.95 [76.67-82.87]    |
| <b>Clients' opinions</b>                    |                           |                        |
| Reviewed                                    | 272                       | 30.03 [26.39-33.94]    |
| Not reviewed                                | 633                       | 69.97 [66.06-73.61]    |
| <b>Number of staffs per facility</b>        |                           |                        |
| Median (IQR)                                | 3 (2,6)                   |                        |
| <b>Number of delivery beds per facility</b> |                           |                        |
| Mean (SD)                                   | 1.41 (1.02)               |                        |

3 **IQR: Interquartile range; SD: Standard deviation**

## 1 **Seven signal functions for BEmONC by type of facility and managing authority**

2 Table 2, shows the distribution of the availability of seven signal function for BEmONC  
3 by type of facility and managing authority. Overall availability of these seven signal functions  
4 (parental administration of the antibiotic, parental administration of oxytocic, parental  
5 administration of anticonvulsant, assisted vaginal delivery, manual removal of placenta, manual  
6 removal of retained products or conception, and neonatal resuscitation) were consistently higher  
7 among hospitals than health centers and dispensaries ( $P<0.001$ ). Despite the fact that private  
8 facilities were consistently reported the higher availability of these seven signal functions  
9 compared to public facilities, only parental administration of the antibiotic, parental  
10 administration of anticonvulsants, and neonatal resuscitation were significantly higher in private  
11 facilities ( $P<0.001$ ). Regardless of facility type and managing authority, majority of the facilities  
12 reported high availability of parental administration of oxytocic (83.61%), assisted vaginal  
13 delivery (69.60%), and neonatal resuscitations (52.14%) while less than half of all facilities  
14 reported availability of manual removal of retained products or conception (35.36%), parental  
15 administration of antibiotic (34.01%), manual removal of placenta (33.95%), and parental  
16 administration of anticonvulsants (13.35%).

1  
2  
3 **1 Table 2 Percentage distribution of seven signal functions for Basic Emergency Obstetric and Newborn Care services by type of**  
4  
5 **2 facility and managing authority, TSPA 2014-2015 (N=905).**  
6

| 7 Variable                                                       | 8 Facility type                          |                                      |                                 | 9 Managing authority          |                                | 10 Total percent<br>Percent [95% CI] |
|------------------------------------------------------------------|------------------------------------------|--------------------------------------|---------------------------------|-------------------------------|--------------------------------|--------------------------------------|
|                                                                  | 11 Dispensary/Clinic<br>Percent [95% CI] | 12 Health centre<br>Percent [95% CI] | 13 Hospital<br>Percent [95% CI] | 14 Public<br>Percent [95% CI] | 15 Private<br>Percent [95% CI] |                                      |
| 16 Parental administration of<br>17 antibiotic                   | 27.32 [22.76-32.40]                      | 60.01 [54.49-65.29]                  | 83.95* [69.70-92.24]            | 32.04 [27.75-36.65]           | 44.03* [33.88-54.7]            | 34.01 [30.05-38.20]                  |
| 18 Parental administration of<br>19 oxytocin                     | 81.77 [77.30-85.52]                      | 90.94 [86.81-93.87]                  | 96.86* [93.83-98.42]            | 83.69 [79.43-87.22]           | 83.16 [73.18-89.93]            | 83.61 [79.87-86.76]                  |
| 20 Parental administration of<br>21 anticonvulsants              | 6.96 [4.61-10.37]                        | 31.59 [26.67-36.96]                  | 77.56* [65.35-86.34]            | 10.93 [8.64-13.74]            | 25.63* [18.48-34.39]           | 13.35 [11.09-15.99]                  |
| 22 Assisted vaginal delivery                                     | 68.00 [62.94-72.67]                      | 72.85 [67.72-77.44]                  | 88.94* [84.21-92.39]            | 69.50 [64.70-73.91]           | 70.11 [59.07-79.22]            | 69.60 [65.35-73.54]                  |
| 23 Manual removal of placenta                                    | 30.22 [25.45-35.46]                      | 45.34 [40.00-50.79]                  | 69.66* [58.79-78.70]            | 32.87 [28.43-37.64]           | 39.46 [29.99-49.80]            | 33.95 [29.86-38.31]                  |
| 24 Manual removal of retained<br>25 products of conception       | 31.10 [26.78-35.77]                      | 51.35 [46.16-56.52]                  | 68.56* [57.87-77.59]            | 34.88 [30.70-39.30]           | 37.79 [28.43-48.17]            | 35.36 [31.65-39.25]                  |
| 26 Neonatal resuscitation                                        | 46.78 [41.67-51.95]                      | 73.05 [68.12-77.47]                  | 92.03* [87.78-94.88]            | 50.64 [45.87-55.41]           | 59.76* [48.35-70.20]           | 52.14 [47.8-56.45]                   |
| 27 Number of facilities providing<br>28 normal delivery services | 751                                      | 110                                  | 44                              | 756                           | 169                            | 905                                  |

31 **3 \* = P-value <0.001**  
32  
33  
34  
35  
36  
37  
38  
39  
40  
41  
42  
43  
44  
45  
46  
47

## 1 Availability of important supportive items for delivery and newborns care services

2 **Human resources (staff training):** Only (206, 22.75%) facilities reported having at least  
3 one staff who had received refresher training in delivery and newborns care. Also about one-  
4 third (270, 29.80%) of facilities reported having recommended guidelines related to delivery and  
5 newborn care.

6 **Essential equipment and supplies:** Overall, the majority (890, 98.35%) of facilities  
7 reported dedicating at least one bed for delivery purposes, (780, 86.24%) having sterile gloves,  
8 (760, 84.05%) having delivery packs, and (692, 76.48%) having a neonatal bags and masks.  
9 However, less than a quarter of facilities reported having suction apparatus (23.14%),  
10 sterilization equipment (20.75%), examination light (14.37%), vacuum aspirator or Dilatation  
11 and Curettage D&C kit (7.51%), and manual vacuum extractor (5.31%).

12 **Medicines and commodities:** Regarding availability of essential medicines for delivery,  
13 injectable uterotonic (78.81%), skin disinfectant (61.10%), and injectable diazepam (55.23%)  
14 were highly reported. While intravenous fluids (48.15%), injectable magnesium sulfate (40.77%),  
15 injectable antibiotic (32.11%) were poorly reported. On the other hand, regarding essential  
16 medicines for newborn care, more than half of facilities reported availability of amoxicillin  
17 suspension (62.90%) and injectable ceftriaxone (56.69%) while less than one-third of facilities  
18 reported availability of injectable gentamicin (29.54%), antibiotic eye ointment (28.05%), and  
19 4% chlorhexidine (11.95%) (Table 3).

1 **Table 3 Percentage distribution of readiness indicators for providing Basic Emergency**  
 2 **Obstetric and Newborn Care services, TSPA 2014-2015 (N=905).**

| Variable                         | Frequency (n)<br>weighted | Percent [95% CI]    |
|----------------------------------|---------------------------|---------------------|
| <b>Staff and training</b>        |                           |                     |
| Presence of guidelines           | 270                       | 29.80 [26.16-33.70] |
| Availability of trained staff    | 206                       | 22.75 [19.39-26.50] |
| <b>Equipment and supplies</b>    |                           |                     |
| Emergency transport              | 567                       | 62.54 [58.05-66.82] |
| Sterilization equipment          | 188                       | 20.75 [18.06-23.74] |
| Examination light                | 130                       | 14.37 [11.80-17.39] |
| Delivery pack                    | 760                       | 84.05 [80.33-87.19] |
| Suction apparatus                | 209                       | 23.14 [19.76-26.91] |
| Manual vacuum extractor          | 48                        | 5.31 [4.04-6.95]    |
| Vacuum aspirator or D&C kit      | 68                        | 7.51 [6.07-9.27]    |
| Neonatal bag and mask            | 692                       | 76.48 [72.94-79.68] |
| Delivery bed                     | 890                       | 98.35 [96.53-99.23] |
| Partograph                       | 520                       | 57.51 [53.11-61.79] |
| Gloves                           | 780                       | 86.24 [82.89-89.01] |
| <b>Medicines and commodities</b> |                           |                     |
| Essential medicines for delivery |                           |                     |
| Injectable antibiotic            | 291                       | 32.11 [28.04-36.47] |
| Injectable uterotonic            | 713                       | 78.81 [74.66-82.44] |
| Injectable magnesium sulfate     | 368                       | 40.77 [36.62-45.04] |
| Injectable diazepam              | 500                       | 55.23 [50.81-59.57] |
| Intravenous fluids               | 436                       | 48.15 [43.56-52.78] |
| Skin disinfectant                | 553                       | 61.10 [56.50-65.51] |
| Essential medicines for newborns |                           |                     |
| Antibiotic eye ointment          | 254                       | 28.05 [24.32-32.11] |
| 4% chlorhexidine                 | 108                       | 11.95 [9.43-15.04]  |
| Injectable gentamicin            | 267                       | 29.54 [25.69-33.71] |
| Injectable ceftriaxone           | 513                       | 56.69 [52.08-61.19] |
| Amoxicillin suspension           | 569                       | 62.90 [58.29-67.28] |

3

4

## 1 **Facility readiness to provide BEmONC services**

2 Figure 1 shows the mean percentage score corresponding to the three domains and the  
3 overall index of facility readiness to provide BEmONC. Each of the three domains had a mean  
4 percentage score of less than 50% based on the indicators suggested by WHO-SARA tool, that  
5 yield overall mean percentage score (SD) of 40.3 (17.6)%. However, 267 (29.50%) of all health  
6 facilities had overall percentage readiness score of 50% or more, therefore, were considered  
7 ready to provide BEmONC services.

## 8 **Overall BEmONC readiness score according to the type of facility and managing authority**

9 The overall readiness score was found to differ significantly according to the type of  
10 facility, with a higher score at hospitals level than at dispensaries ( $P<0.001$ ). However, there was  
11 no difference in the overall readiness score according to the managing authority at each level of  
12 facility type ( $P>0.05$ ) (Figure 2).

## 13 **Factors associated with facility readiness to provide BEmONC services**

14 Table 4 presents the results of the bivariate and multivariate analysis. In bivariate analysis,  
15 all explanatory variables showed association with outcome variable “BEmONC service readiness”  
16 at  $P<0.05$ , therefore, were selected and included in multiple regression models by using objective  
17 criterion-based methods to predict their association with readiness to provide BEmONC services.  
18 The results of multiple regression analysis showed that the readiness of facility to provide  
19 BEmONC services was higher at health centres (11.54 percentage points better than dispensary  
20 and clinics), at facilities which performed quality assurance (5.45 percentage points better than  
21 those not performed), at facilities reported regular reviewing maternal, newborn deaths or “near-  
22 misses” (6.49 percentage points better than those not reviewed), at facilities that reviewed clients  
23 opinion about health facility or its services (4.29 percentage points better than those not reviewed



1 clients opinions), and facility with more delivery beds (2.44 percentage points for each doubling  
 2 of bed per facility).

3 **Table 4 Results of unadjusted and adjusted multiple regression models of factors**  
 4 **associated with readiness to provide Basic Emergency Obstetric and Newborn Care**  
 5 **services, TSPA 2014-2015 (N=905).**

| Variable                                                                | Unadjusted |           | Adjusted          |           |
|-------------------------------------------------------------------------|------------|-----------|-------------------|-----------|
|                                                                         | Coef       | Std error | Coef <sup>@</sup> | Std error |
| <b>Facility location</b> (ref: Rural)                                   |            |           |                   |           |
| Urban                                                                   | 8.64**     | 2.29      | 0.20              | 2.08      |
| <b>Facility type</b> (ref: clinic/dispensary)                           |            |           |                   |           |
| Health center                                                           | 18.15**    | 1.24      | <b>11.54**</b>    | 2.02      |
| Hospital                                                                | 26.09**    | 2.54      | 8.06              | 4.15      |
| <b>Managing authority</b> (ref: Public)                                 |            |           |                   |           |
| Private                                                                 | 8.46**     | 1.90      | 3.56              | 1.87      |
| <b>Duty schedule for 24 hours</b> (ref: No)                             |            |           |                   |           |
| Yes                                                                     | 12.28**    | 1.62      | 0.52              | 2.13      |
| <b>Quality assurance</b> (ref: Not performed)                           |            |           |                   |           |
| Performed                                                               | 14.24**    | 2.36      | <b>5.45*</b>      | 2.44      |
| <b>Maternal/newborn deaths</b> (ref: Not reviewed)                      |            |           |                   |           |
| Reviewed                                                                | 14.76**    | 1.76      | <b>6.49**</b>     | 1.89      |
| <b>Clients' opinions reviewed</b> (ref: No)                             |            |           |                   |           |
| Yes                                                                     | 9.90**     | 1.74      | <b>4.29*</b>      | 1.68      |
| <b>Number of staffs per facility</b><br>(as continuous variable)        | 0.09**     | 0.04      | -0.001            | 0.013     |
| <b>Number of delivery beds per facility</b><br>(as continuous variable) | 6.28**     | 0.58      | <b>2.44*</b>      | 0.83      |

6 \*  $P < 0.05$ ; \*\*  $P < 0.001$ .

7 **Coef: Coefficient; Std: Standard error.**

8 **<sup>@</sup>Adjusted coefficient; it has been adjusted by all variables in the table.**

## 1 DISCUSSION

2 This study used a nationally representative data from Tanzania as an example of low-  
3 resource country to assess the availability and readiness of health facilities to provide BEmONC  
4 services among health facilities. The study found a relatively low average score of facilities to  
5 provide BEmONC services. Furthermore, it found that type of the facility, performing quality  
6 assurance, regular reviewing of maternal, newborn deaths or near-miss cases, reviewing clients'  
7 opinion, and the number of delivery beds per facility were significantly associated with higher  
8 readiness to provide BEmONC services.

9 Availability of seven signal functions for BEmONC is crucial to reduce maternal and  
10 neonatal mortality.<sup>39</sup> The current study found disparities in the availability of these seven signal  
11 functions according to the type of facility and managing authority. Despite the fact that private  
12 facilities consistently reported the higher availability of the seven signal functions compared to  
13 public facilities, only three signal functions; parental administration of the antibiotic, parental  
14 administration of anticonvulsants, and neonatal resuscitation were significantly more reported in  
15 privately owned than publicly owned facilities. Similarly, hospitals were found to report  
16 significantly more availability of the signal functions than lower-level facilities (health centres  
17 and dispensaries). These findings are in agreement with the findings of a study conducted in  
18 Haiti in 2014.<sup>40</sup> The similarity of the findings of these studies might be due to the similar  
19 methodology used; both studies used data from the national representative sample collected by  
20 DHS program. Therefore, the questionnaire used for the interviews were nearly similar. Also,  
21 similar in socio-economic determinants as all these two countries are under the group of LMICs.  
22 Furthermore, the current study found that availability of parental administration of  
23 anticonvulsants is still a challenge and as a result it compromises the provision of BEmONC in

1  
2  
3 1 Tanzania particularly in public and lower-level health facilities. The similar finding has been  
4  
5 2 reported in another region with a low-resource setting.<sup>41</sup> Lack of this important component of  
6  
7 3 BEmONC, might led to unnecessary delays to prevent or intervene pre-eclampsia/eclampsia that  
8  
9 4 is one of the three leading causes of maternal morbidity and mortality.<sup>42</sup> Together with other  
10  
11 5 suboptimal availability of parental administration of antibiotic, manual removal of placenta and  
12  
13 6 retained products of conception suggesting that, despite the increased coverage of antenatal care,  
14  
15 7 facility deliveries, births assisted by skilled provider and postnatal care, these efforts alone can  
16  
17 8 not reduce MMR and NMR without improving the availability of BEmONC services.<sup>38,43</sup> The  
18  
19 9 explanation of the low availability of seven signal functions in the public and lower-level  
20  
21 10 facilities in Tanzania might be due to the current long process of ordering and delivering of drugs  
22  
23 11 and medical supplies that use a new system called Integrated Logistic System (ILS). With this  
24  
25 12 system, facility places its order through District Medical Officer's (DMO) office to the Medical  
26  
27 13 Department Store (MSD), a body that operates under Ministry of Health responsible for  
28  
29 14 managing all the procurement and supply of medical items concerning public facilities.<sup>44</sup> Hence,  
30  
31 15 any faults or delays in one of this channel of the ordering system, may result into the low  
32  
33 16 availability of items or services in the facilities. This may compromise the efforts towards  
34  
35 17 achieving the target set by Tanzanian government that requires, all hospitals and at least 70% of  
36  
37 18 health centres and dispensaries to provide BEmONC services at the end of 2020.<sup>22</sup>  
38  
39  
40  
41  
42  
43  
44

45 19 Facility service readiness is an important aspect of facilities' commitment to ensuring  
46  
47 20 cumulative availability of components required to provide a specific service<sup>31</sup>. The current study  
48  
49 21 found a relatively low average score of readiness of facilities to provide BEmONC services. A  
50  
51 22 similar finding has been observed in the study conducted in Nigeria.<sup>45</sup> The similarity of the  
52  
53 23 finding between these studies might be due to similar socio-economic background between these  
54  
55  
56  
57  
58  
59  
60

1 two countries which are located in sub-Saharan Africa. Additionally, the current study found no  
2 difference in overall readiness of facility to provide BEmONC services between public and  
3 private facilities. However, the study found the significant difference of BEmONC readiness  
4 according to the type of facility, in which higher-level facilities (hospitals) were found to have  
5 high readiness score compared to lower-level facilities (dispensaries/clinics). The suboptimal  
6 readiness observed in the lower-level facilities might be due to inadequate availability of  
7 essential components for providing BEmONC i.e out of seven signal functions, only two  
8 functions were reported available in more than half within lower-level health facilities, while the  
9 remaining five were poorly reported in these facilities. The finding is in agreement with the  
10 previous study conducted in Kenya.<sup>30</sup>

11 In agreement with the fact that quality assurance guaranteeing and maintaining a high  
12 standard of the service provided within the healthcare systems.<sup>46</sup> The current study found that  
13 facilities that reported performing quality assurance were more likely to be ready to provide  
14 BEmONC services than facilities reported not performing quality assurance. This might be due  
15 to the fact that, quality assurance matched with continuous monitoring and persistent feedback  
16 for the purpose of improving services offered.<sup>47</sup> Therefore, based on recommendations from  
17 quality assurance teams, these facilities are more likely to improve the availability of services  
18 that may result in their high readiness score. However, the performance of quality assurance is  
19 still a problem in Tanzanian health system in which minority of health facilities regularly  
20 performing it.<sup>48</sup>

21 Each maternal or newborn death has a story to tell,<sup>36</sup> therefore, reviewing of these deaths  
22 is recognized as a widely recommended tool to improve obstetric and neonatal care.<sup>49</sup> In  
23 agreement with this previous fact, the current study found that facilities which performed

1  
2  
3 1 maternal and newborn deaths reviews were more likely to be ready to provide BEmONC  
4  
5 2 services than facilities that reported not performing these reviews. This might be due to the fact  
6  
7 3 that the facilities that performing deaths reviews, used information obtained from the reviews as  
8  
9 4 the prerequisite for improving BEmONC service availability and readiness. Also, clients'  
10  
11 5 opinions are the most beneficial parameter for judging the availability and readiness of the  
12  
13 6 facility to provide specific services. The current study indicated that the likelihood of facility  
14  
15 7 readiness to provide BEmONC were higher among facilities that reviewed clients' opinions than  
16  
17 8 those that did not. This might be explained by the fact that clients' opinions not only reflects the  
18  
19 9 satisfaction with service received but also provide positive and negative feedback towards  
20  
21 10 services provided by facility or health providers.<sup>50</sup> This feedback may be used to correct the  
22  
23 11 shortcomings highlighted by patients, hence improve the availability of services that are  
24  
25 12 important aspect to assess the readiness of the facility to provide services.  
26  
27  
28  
29  
30

31  
32 13 The availability of delivery bed is very important in the health facility as it creates a  
33  
34 14 better birth environment for both mother and health provider to support the childbirth process  
35  
36 15 and labor progress.<sup>51,52</sup> Therefore, facilities having delivery beds express their commitment  
37  
38 16 towards the provision of BEmONC. The current study provides evidence that facilities with  
39  
40 17 many numbers of delivery beds were more likely to be ready to provide BEmONC than those  
41  
42 18 without or with the fewer number of delivery beds. However, the unreliability of delivery beds  
43  
44 19 and other medical supplies within health facilities in Tanzania have been highlighted as among  
45  
46 20 the barriers of timely provision of BEmONC. This might be contributed by inadequate allocated  
47  
48 21 budget from central government, insufficient ordering of BEmONC supplies, out of stock at  
49  
50 22 MSD, and lack of accountability within the supply system.<sup>38</sup>  
51  
52  
53  
54  
55  
56  
57  
58  
59  
60

1  
2  
3 1 The strength of the current study is that it analyzed the data with a nationwide  
4  
5 2 representative sample of health facilities in Tanzania as an example of the low-resource country.  
6  
7 3 The use of such dataset suggests that the findings from this study accurately reflect the current  
8  
9 4 situation regarding availability and readiness of facilities to provide BEmONC in the study  
10  
11 5 setting. Since TSPA survey employed the complex sampling procedures, the estimates were  
12  
13 6 adjusted for clustering effect and weighted to correct for non- response and disproportionate  
14  
15 7 sampling. However, the study has some limitations, being a cross-sectional in nature, the causal  
16  
17 8 relationship could not be assessed, therefore, the results should be interpreted with caution. Also,  
18  
19 9 the study is subjected to misclassification bias as a result of arbitrary cut-off point set at 50%,  
20  
21 10 this might misclassified readiness of health facilities to provide BEmONC services. Though, the  
22  
23 11 effect of this bias has been minimized by include many indicators as suggested by WHO to  
24  
25 12 assess the level of facility readiness.  
26  
27  
28  
29  
30

31  
32 13 In summary, the current study found the disparities in the availability of seven signal  
33  
34 14 functions and readiness to provide BEmONC services among health facilities in Tanzania. It also  
35  
36 15 highlighted the gaps in the availability of important supportive items such as refresher training  
37  
38 16 and guidelines for the provision of BEmONC. The study recommends that the higher authorities  
39  
40 17 (government) through ministry of health to emphasizes the health facilities to perform service  
41  
42 18 quality assurance and maternal and newborns deaths audits on regular basis, also, to consider a  
43  
44 19 fair distribution through ‘push’ system of clinical guidelines, essential medicines, equipment  
45  
46 20 refresher training so that to improve BEmONC services. Furthermore, it suggests other studies to  
47  
48 21 be conducted to identify what hinders the effective implementation of government policies  
49  
50 22 regarding the readiness of health facilities to provide BEmONC services.  
51  
52  
53  
54  
55  
56  
57  
58  
59  
60

## 1 **Authors' contributions**

2 DB conceptualized and designed the study, performed statistical analysis and wrote the first and  
3 revised draft of the manuscript. AE involved in the interpretation of data, revised and edited the  
4 manuscript. BCM provided advice on statistical analysis, interpretation of data, and edited the  
5 manuscript; All authors read and approved the final manuscript.

## 6 **Acknowledgment**

7 We would like to acknowledge ICF International, Rockville, Maryland, USA, through DHS  
8 program for giving us permission to access the Tanzania SPA 2014-2015 dataset.

## 9 **Funding**

10 This research received no specific grant from any funding agency in the public, commercial or  
11 not-for-profit sectors.

## 12 **Competing interest**

13 None to declare.

## 14 **Provenance and peer review**

15 Not commissioned; externally peer reviewed.

## 16 **A data sharing statement**

17 The datasets generated during the current study are available from within the Demographic and  
18 Health Survey Program repository: <http://dhsprogram.com/data/available-datasets.cfm>

19

## 1 REFERENCES

- 2 1 World Health Organization (WHO). Trends in Maternal Mortality : 1990 to 2015:  
3 Estimates by WHO, UNICEF, UNFPA, The World Bank and the United Nations  
4 Population Division. WHO. 2015. doi:ISBN 978 92 4 156514 1
- 5 2 Wang H, Bhutta ZA, Coates MM, *et al.* Global, regional, national, and selected  
6 subnational levels of stillbirths, neonatal, infant, and under-5 mortality, 1980–2015: a  
7 systematic analysis for the Global Burden of Disease Study 2015. *Lancet* 2016;**388**:1725–  
8 74. doi:10.1016/S0140-6736(16)31575-6
- 9 3 Wang H, Liddell CA, Coates MM, *et al.* Global, regional, and national levels of neonatal,  
10 infant, and under-5 mortality during 1990–2013: a systematic analysis for the Global  
11 Burden of Disease Study 2013. *Lancet* 2014;**384**:957–79. doi:10.1016/S0140-  
12 6736(14)60497-9
- 13 4 World Health Organization (WHO). Maternal mortality fact sheet. 2015. Available from:  
14 <http://www.who.int/mediacentre/factsheets/fs348/en/> Accessed 5 March 2018.
- 15 5 Say L, Chou D, Gemmill A, *et al.* Global causes of maternal death: a WHO systematic  
16 analysis. *Lancet Glob Heal* 2014;**2**:e323–33. doi:10.1016/S2214-109X(14)70227-X
- 17 6 Lawn JE, Cousens S, Zupan J. 4 million neonatal deaths: When? Where? Why? *Lancet*  
18 2005;**365**:891–900. doi:10.1016/S0140-6736(05)71048-5
- 19 7 Alkema L, Chou D, Hogan D, *et al.* Global , regional , and national levels and trends in  
20 maternal mortality between 1990 and 2015 , with scenario-based projections to 2030 : a  
21 systematic analysis by the UN Maternal Mortality Estimation Inter-Agency Group. *Lancet*



- 1  
2  
3 1 2015;**6736**:1–13. doi:10.1016/S0140-6736(15)00838-7  
4  
5  
6 2 8 Lawn J, Mongi P, Cousens S. Opportunities for Africa’s Newborns: Africa’s newborns –  
7  
8 3 counting them and making them count. 2006. doi:10.1016/S0140-6736(06)91254-7  
9  
10  
11 4 9 National Bureau of Statistics (NBS) [Tanzania] and ICF Macro. 2011. Tanzania  
12  
13 Demographic and Health Survey 2010. Dar es Salaam, Tanzania: NBS and ICF Macro.  
14  
15 Available form:  
16  
17 6  
18 7 <https://dhsprogram.com/pubs/pdf/FR243/FR243%5B24June2011%5D.pdf> Accessed 5  
19  
20 8 March 2018.  
21  
22  
23  
24 9 10 Ministry of Health, Community Development, Gender, Elderly and Children  
25  
26 10 (MoHCDGEC) [Tanzania Mainland], Ministry of Health (MoH) [Zanzibar], National  
27  
28 11 Bureau of Statistics (NBS), Office of the Chief Government Statistician (OCGS), and ICF.  
29  
30 12 2016. *Tanzania Demographic and Health Survey and Malaria Indicator Survey (TDHS-*  
31  
32 13 *MIS) 2015-16*. Dar es Salaam, Tanzania, and Rockville, Maryland, USA: MoHCDGEC,  
33  
34 14 MoH, NBS, OCGS, and ICF; 2016. <https://dhsprogram.com/pubs/pdf/FR321/FR321.pdf>  
35  
36 15 Accessed 5 March 2018.  
37  
38  
39  
40  
41 16 11 Ministry of Health and Social Welfare (MoHSW). The National Road Map Strategic Plan  
42  
43 17 to Accelerate Reduction of Maternal, Newborn and Child Deaths in Tanzania (2008-15).  
44  
45 18 2008. Available from: <http://www.who.int/pmnch/countries/tanzaniamapstrategic.pdf>  
46  
47 19 Accessed 5 March 2018.  
48  
49  
50  
51 20 12 United Nations. *The Sustainable Development Goals Report 2016*. United Nations 2016.  
52  
53 21 doi:10.18356/3405d09f-en  
54  
55  
56  
57  
58  
59  
60

- 1  
2  
3 1 13 Salam RA, Mansoor T, Mallick D, *et al*. Essential childbirth and postnatal interventions  
4  
5 for improved maternal and neonatal health. *Reprod Health* 2014;**11**:S3. doi:10.1186/1742-  
6 2  
7 4755-11-S1-S3  
8 3  
9  
10  
11 4 14 Paxton A, Maine D, Freedman L, *et al*. The evidence for emergency obstetric care.  
12  
13 Published Online First: 2005. doi:10.1016/j.ijgo.2004.11.026  
14 5  
15  
16 6 15 Pearson L, Shoo R. Availability and use of emergency obstetric services : Kenya ,  
17  
18 Rwanda , Southern Sudan , and Uganda. 2005;:208–15. doi:10.1016/j.ijgo.2004.09.027  
19 7  
20  
21 8 16 World Health Organization (WHO), UNFPA, UNICEF and Mailman School of Public  
22  
23 Health. Averting Maternal Death and Disability (AMDD). Monitoring emergency  
24 9  
25 obstetric care: a handbook. WHO. 2009. Available from:  
26 10  
27 <http://www.who.int/reproductivehealth/publications/monitoring/9789241547734/en/>  
28 11  
29 Accessed 5 March 2018.  
30  
31  
32  
33  
34 13 17 Bhandari T, Dangal G. Emergency Obstetric Care: Strategy for Reducing Maternal  
35  
36 Mortality in Developing Countries. *Nepal J Obstet Gynaecol* 2014;**9**:8–16.  
37 14  
38 doi:10.3126/njog.v9i1.11179  
39 15  
40  
41  
42 16 18 Holmer H, Oyerinde K, Meara JG, *et al*. The global met need for emergency obstetric  
43  
44 care : a systematic review. 2015;:183–90. doi:10.1111/1471-0528.13230  
45 17  
46  
47 18 19 Ueno E, Adegoke AA. Skilled Birth Attendants in Tanzania : A Descriptive Study of  
48  
49 Cadres and Emergency Obstetric Care Signal Functions Performed. Published Online  
50 19  
51 First: 2014. doi:10.1007/s10995-014-1506-z  
52 20  
53  
54  
55 21 20 Banke-thomas A, Wright K, Sonoiki O, *et al*. Assessing emergency obstetric care  
56  
57

- 1  
2  
3 1 provision in low- and middle-income countries : a systematic review of the application of  
4  
5 2 global guidelines. 2016;**1**:1–13.  
6  
7  
8 3 21 United Republic of Tanzania (URT). National Emergency Obstetric and Newborn Care  
9  
10 4 (EmONC) Assessment. RCHS, Directorate of Preventive Services, United Republic of  
11  
12 5 Tanzania, Dar es Salaam. 2015.  
13  
14  
15  
16 6 22 Ministry of Health Community Development Gender Elderly and Children  
17  
18 7 (MOHCDGEC). The National Road Map Strategic Plan to Improve Reproductive,  
19  
20 8 Maternal, Newborn, Child and Adolescent Health in Tanzania (2016 - 2020) (One Plan II).  
21  
22 9 2016. Available from:  
23  
24 10 [http://globalfinancingfacility.org/sites/gff\\_new/files/documents/Tanzania\\_One\\_Plan\\_II.pdf](http://globalfinancingfacility.org/sites/gff_new/files/documents/Tanzania_One_Plan_II.pdf)  
25  
26 11 f Accessed 5 March 2018.  
27  
28  
29  
30  
31 12 23 Mkoka DA, Kiwara A, Goicolea I, *et al*. Governing the implementation of Emergency  
32  
33 13 Obstetric Care: experiences of Rural District Health Managers, Tanzania. *BMC Health*  
34  
35 14 *Serv Res* 2014;**14**:333. doi:10.1186/1472-6963-14-333  
36  
37  
38  
39 15 24 Koblinsky M, Moyer CA, Calvert C, *et al*. Quality maternity care for every woman,  
40  
41 16 everywhere: a call to action. *Lancet* 2016;**388**:2307–20. doi:10.1016/S0140-  
42  
43 17 6736(16)31333-2  
44  
45  
46  
47 18 25 Otolorin E, Gomez P, Currie S, *et al*. Essential basic and emergency obstetric and  
48  
49 19 newborn care: From education and training to service delivery and quality of care. *Int J*  
50  
51 20 *Gynecol Obstet* 2015;**130**:S46–53. doi:10.1016/j.ijgo.2015.03.007  
52  
53  
54 21 26 Echoka E, Kombe Y, Dubourg D, *et al*. Existence and functionality of emergency  
55  
56  
57  
58  
59  
60

- 1  
2  
3 1 obstetric care services at district level in Kenya: theoretical coverage versus reality. *BMC*  
4  
5 2 *Health Serv Res* 2013;**13**:113. doi:10.1186/1472-6963-13-113  
6  
7  
8 3 27 Alam M-U, Wichaidit W, Unicomb L, *et al*. Availability and Quality of Emergency  
9  
10 4 Obstetric and Newborn Care in Bangladesh. *Am J Trop Med Hyg* 2016;**95**:298–306.  
11  
12 5 doi:10.4269/ajtmh.15-0350  
13  
14  
15  
16 6 28 Roy L, Biswas TK, Chowdhury ME. Emergency obstetric and newborn care signal  
17  
18 7 functions in public and private facilities in Bangladesh. *PLoS One* 2017;**12**:e0187238.  
19  
20 8 doi:10.1371/journal.pone.0187238  
21  
22  
23  
24 9 29 Tecla SJ, Franklin B, David A, *et al*. Assessing facility readiness to offer basic emergency  
25  
26 10 obstetrics and neonatal care ( BEmONC ) services in health care facilities of west Pokot  
27  
28 11 county , Kenya. *J Clin Simul Res* 2017;**7**:25–39.  
29  
30  
31  
32 12 30 Measure Evaluation PIMA. Health Facility Readiness to Provide Emergency Obstetric  
33  
34 13 and Newborn Care in Kenya: Results of a 2014 Assessment of 13 Kenyan Counties with  
35  
36 14 High Maternal Mortality. Nairobi, Kenya: MEASURE Evaluation PIMA, University of  
37  
38 15 North Carolina at Chapel Hill. 2016. Available from:  
39  
40 16 <https://www.measureevaluation.org/resources/publications/tr-16-123> Accessed 5 March  
41  
42 17 2018.  
43  
44  
45  
46 18 31 Health Statistics and Information Systems, World Health Organization (WHO). Service  
47  
48 19 Availability and Readiness Assessment (SARA): an annual monitoring system for service  
49  
50 20 delivery: Reference Manual, Version 2.2. 2014. Available from:  
51  
52 21 [http://www.who.int/healthinfo/systems/sara\\_reference\\_manual/en/](http://www.who.int/healthinfo/systems/sara_reference_manual/en/) Accessed 5 March  
53  
54 22 2018.  
55  
56  
57  
58  
59  
60

- 1  
2  
3 1 32 Ministry of Health and Social Welfare (MoHSW) [Tanzania Mainland], Ministry of  
4  
5 2 Health (MoH) [Zanzibar], National Bureau of Statistics (NBS), Office of the Chief  
6  
7 3 Government Statistician (OCGS), and ICF International 2015. Tanzania Service Provision  
8  
9 Assessm. 2015. Available from: <https://dhsprogram.com/pubs/pdf/SPA22/SPA22.pdf>  
10 4  
11 Accessed 5 March 2018.  
12 5  
13  
14  
15 6 33 Bintabara D, Nakamura K, Seino K. Determinants of facility readiness for integration of  
16  
17 7 family planning with HIV testing and counseling services: evidence from the Tanzania  
18  
19 8 service provision assessment survey, 2014–2015. *BMC Health Serv Res* 2017;**17**:844.  
20  
21 doi:10.1186/s12913-017-2809-8  
22 9  
23  
24  
25 10 34 Bintabara D, Mpondo BCT. Preparedness of lower-level health facilities and the  
26  
27 11 associated factors for the outpatient primary care of hypertension: Evidence from  
28  
29 12 Tanzanian national survey. *PLoS One* 2018;**13**:e0192942.  
30  
31 doi:10.1371/journal.pone.0192942  
32 13  
33  
34  
35 14 35 Maithe E. Fowler. Quality assurance: Definition and Importance. *Plast Surg Nurs*  
36  
37 15 1990;**10**:94–6.  
38  
39  
40  
41 16 36 Lewis G. Beyond the Numbers: reviewing maternal deaths and complications to make  
42  
43 17 pregnancy safer. *Br Med Bull* 2003;**67**:27–37. doi:10.1093/bmb/ldg009  
44  
45  
46 18 37 Renfrew MJ, McFadden A, Bastos MH, *et al*. Midwifery and quality care: findings from a  
47  
48 19 new evidence-informed framework for maternal and newborn care. *Lancet*  
49  
50 2014;**384**:1129–45. doi:10.1016/S0140-6736(14)60789-3  
51 20  
52  
53  
54 21 38 Mkoka DA, Goicolea I, Kiwara A, *et al*. Availability of drugs and medical supplies for  
55  
56  
57  
58  
59  
60

- 1  
2  
3 1 emergency obstetric care: experience of health facility managers in a rural District of  
4  
5 2 Tanzania. *BMC Pregnancy Childbirth* 2014;**14**:108. doi:10.1186/1471-2393-14-108  
6  
7  
8 3 39 World Health Organization (WHO). Trends in Maternal Mortality: 1990 to 2013:  
9  
10 4 Estimates by WHO, UNICEF, UNFPA, World Bank Group and the United Nations  
11  
12 5 Population Division. WHO. 2013. doi: ISBN: 978 92 4 150722 6  
13  
14  
15  
16 6 40 Wang W. Influence of Service Readiness on Us of Facility Delivery Care: A Study  
17  
18 7 Linking Health Facility Data and Population in Haiti [WP114]. *DHS Work Pap No 114*  
19  
20 8 2014.  
21  
22  
23  
24 9 41 Roy L, Biswas TK, Chowdhury ME. Emergency obstetric and newborn care signal  
25  
26 10 functions in public and private facilities in Bangladesh. *PLoS One* 2017;**12**:e0187238.  
27  
28 11 doi:10.1371/journal.pone.0187238  
29  
30  
31  
32 12 42 Ghulmiyyah L, Sibai B. Maternal Mortality From Preeclampsia/Eclampsia. *Semin*  
33  
34 13 *Perinatol* 2012;**36**:56–9. doi:10.1053/j.semperi.2011.09.011  
35  
36  
37 14 43 Mselle LT, Moland KM, Mvungi A, *et al*. Why give birth in health facility? Users' and  
38  
39 15 providers' accounts of poor quality of birth care in Tanzania. *BMC Health Serv Res*  
40  
41 16 2013;**13**:174. doi:10.1186/1472-6963-13-174  
42  
43  
44  
45 17 44 Sikika. Medicines and medical supplies availability report. Using absorbent gauze  
46  
47 18 availability survey as an entry point. A case of 71 districts and 30 health facilities across  
48  
49 19 mainland Tanzania. Sikika. 2011. Available from: [http://sikika.or.tz/wp-](http://sikika.or.tz/wp-content/uploads/2013/09/medicines-and-medical-and-supply-availability-report.pdf)  
50  
51 20 [content/uploads/2013/09/medicines-and-medical-and-supply-availability-report.pdf](http://sikika.or.tz/wp-content/uploads/2013/09/medicines-and-medical-and-supply-availability-report.pdf)  
52  
53 21 Accessed 5 March 2018.  
54  
55  
56  
57  
58  
59  
60

- 1  
2  
3 1 45 Gage AJ, Ilombu O, Akinyemi AI. Service readiness, health facility management practices,  
4 and delivery care utilization in five states of Nigeria: a cross-sectional analysis. *BMC*  
5  
6 2  
7  
8 3  
9  
10  
11 4 46 Busari J. Comparative analysis of quality assurance in health care delivery and higher  
12  
13 5  
14  
15  
16 6 47 de Jonge V, Nicolaas JS, van Leerdam ME, *et al.* Overview of the quality assurance  
17  
18 7  
19 movement in health care. *Best Pract Res Clin Gastroenterol* 2011;**25**:337–47.  
20  
21 8  
22  
23  
24 9 48 Ministry of Health and Social Welfare (MoHSW). in-Depth Assessment of the Medicines  
25  
26 10  
27 Supply System in Tanzania. WHO. 2008. Available from:  
28  
29 11  
30  
31  
32  
33  
34 13 49 Kongnyuy EJ, van den Broek N. The difficulties of conducting maternal death reviews in  
35  
36 14  
37 Malawi. *BMC Pregnancy Childbirth* 2008;**8**:42. doi:10.1186/1471-2393-8-42  
38  
39  
40 15 50 Gupta KS, Rokade V. Importance of Quality in Health Care Sector. *J Health Manag*  
41  
42 16  
43 2016;**18**:84–94. doi:10.1177/0972063415625527  
44  
45 17 51 Stark MA, Remyse M, Zwelling E. Importance of the Birth Environment to Support  
46  
47 18  
48 Physiologic Birth. *J Obstet Gynecol Neonatal Nurs* 2016;**45**:285–94.  
49  
50 19  
51  
52  
53 20 52 Zwelling E, Phillips CR. Family-centered maternity care in the new millennium: is it real  
54  
55 21  
56  
57  
58  
59  
60

1  
2  
3 **1 Figure titles/legend**  
4  
5

6 **2 Title; Figure 1 Percentage mean score of the three domains of readiness to provide Basic**  
7

8 **3 Emergency Obstetric and Newborn Care services**  
9

10  
11  
12 **4 Legend 1 Note: numbers in brackets “( )” are corresponding standard deviations of the**  
13

14 **5 mean values**  
15  
16

17 **6 Title; Figure 2 Overall readiness score for providing Basic Emergency Obstetric and**  
18

19 **7 Newborn Care according to type of facility and managing authority**  
20  
21

22 **8 Legend 2 Box shows the limits of 25 and 75% percentile. Horizontal line inside the box**  
23

24 **9 shows the median value. The bar shows the low and upper limits of 95% confidence**  
25  
26

27 **10 interval. The dots show outliers**  
28  
29

30 **11**

31 **12**

32 **13**

33 **14**

34 **15**  
35  
36  
37  
38  
39  
40  
41  
42  
43  
44  
45  
46  
47  
48  
49  
50  
51  
52  
53  
54  
55  
56  
57  
58  
59  
60



1  
2  
3  
4  
5  
6  
7  
8  
9  
10  
11  
12  
13  
14  
15  
16  
17  
18  
19  
20  
21  
22  
23  
24  
25  
26  
27  
28  
29  
30  
31  
32  
33  
34  
35  
36  
37  
38  
39  
40  
41  
42  
43  
44  
45  
46  
47  
48  
49  
50  
51  
52  
53  
54  
55  
56  
57  
58  
59  
60

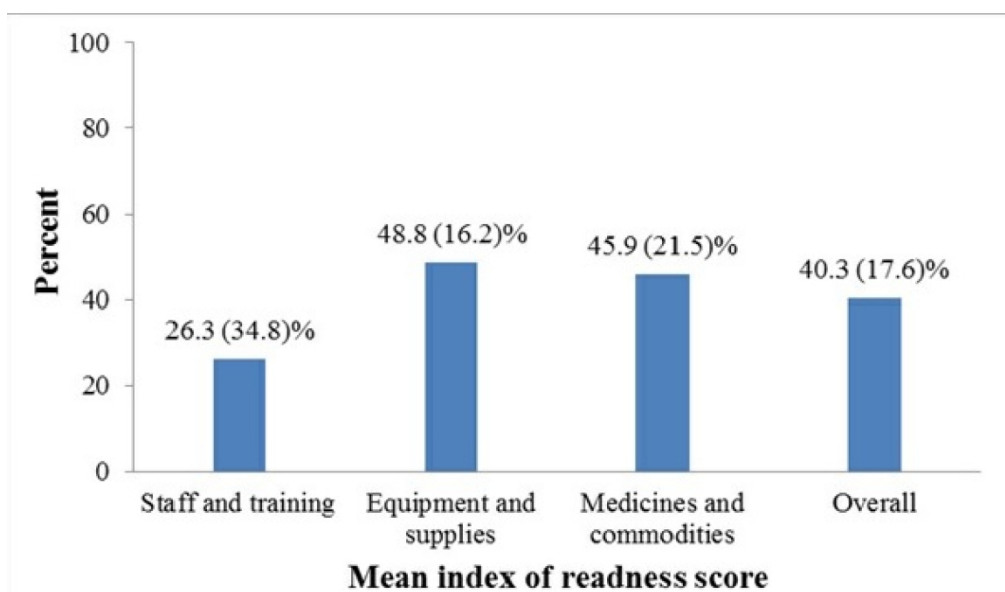

101x59mm (300 x 300 DPI)

1  
2  
3  
4  
5  
6  
7  
8  
9  
10  
11  
12  
13  
14  
15  
16  
17  
18  
19  
20  
21  
22  
23  
24  
25  
26  
27  
28  
29  
30  
31  
32  
33  
34  
35  
36  
37  
38  
39  
40  
41  
42  
43  
44  
45  
46  
47  
48  
49  
50  
51  
52  
53  
54  
55  
56  
57  
58  
59  
60

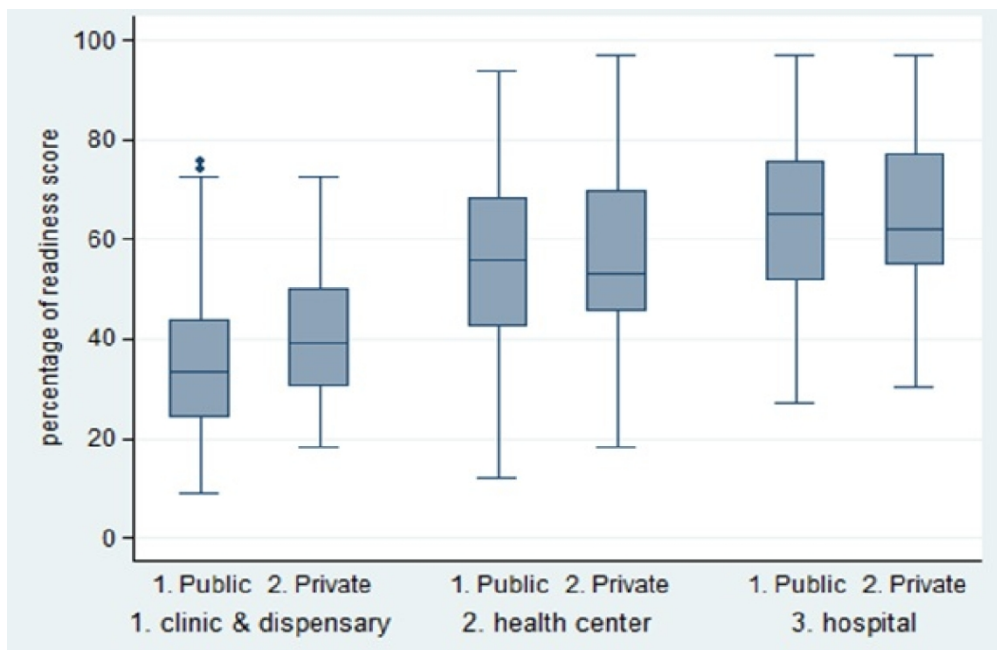

101x65mm (300 x 300 DPI)

**STROBE 2007 (v4) Statement—Checklist of items that should be included in reports of *cross-sectional studies***

| Section/Topic             | Item # | Recommendation                                                                                                                                                                       | Reported on page # |
|---------------------------|--------|--------------------------------------------------------------------------------------------------------------------------------------------------------------------------------------|--------------------|
| <b>Title and abstract</b> | 1      | (a) Indicate the study’s design with a commonly used term in the title or the abstract                                                                                               | Page 1, and 2      |
|                           |        | (b) Provide in the abstract an informative and balanced summary of what was done and what was found                                                                                  | Page 2             |
| <b>Introduction</b>       |        |                                                                                                                                                                                      |                    |
| Background/rationale      | 2      | Explain the scientific background and rationale for the investigation being reported                                                                                                 | Page 5-6           |
| Objectives                | 3      | State specific objectives, including any prespecified hypotheses                                                                                                                     | Page 6             |
| <b>Methods</b>            |        |                                                                                                                                                                                      |                    |
| Study design              | 4      | Present key elements of study design early in the paper                                                                                                                              | Page 7             |
| Setting                   | 5      | Describe the setting, locations, and relevant dates, including periods of recruitment, exposure, follow-up, and data collection                                                      | Page 7-8           |
| Participants              | 6      | (a) Give the eligibility criteria, and the sources and methods of selection of participants                                                                                          | Page 7             |
| Variables                 | 7      | Clearly define all outcomes, exposures, predictors, potential confounders, and effect modifiers. Give diagnostic criteria, if applicable                                             | Page 8-10          |
| Data sources/ measurement | 8*     | For each variable of interest, give sources of data and details of methods of assessment (measurement). Describe comparability of assessment methods if there is more than one group | Page 8-10          |
| Bias                      | 9      | Describe any efforts to address potential sources of bias                                                                                                                            | Page 11-2          |
| Study size                | 10     | Explain how the study size was arrived at                                                                                                                                            | Page 7             |
| Quantitative variables    | 11     | Explain how quantitative variables were handled in the analyses. If applicable, describe which groupings were chosen and why                                                         | Page 11            |
| Statistical methods       | 12     | (a) Describe all statistical methods, including those used to control for confounding                                                                                                | Page 11-2          |
|                           |        | (b) Describe any methods used to examine subgroups and interactions                                                                                                                  | Page 11-2          |
|                           |        | (c) Explain how missing data were addressed                                                                                                                                          | N/A                |
|                           |        | (d) If applicable, describe analytical methods taking account of sampling strategy                                                                                                   | Page 11            |
|                           |        | (e) Describe any sensitivity analyses                                                                                                                                                | N/A                |
| <b>Results</b>            |        |                                                                                                                                                                                      |                    |

|                          |     |                                                                                                                                                                                                              |                     |
|--------------------------|-----|--------------------------------------------------------------------------------------------------------------------------------------------------------------------------------------------------------------|---------------------|
| Participants             | 13* | (a) Report numbers of individuals at each stage of study—eg numbers potentially eligible, examined for eligibility, confirmed eligible, included in the study, completing follow-up, and analysed            | Page 12 and Table 1 |
|                          |     | (b) Give reasons for non-participation at each stage                                                                                                                                                         | N/A                 |
|                          |     | (c) Consider use of a flow diagram                                                                                                                                                                           | N/A                 |
| Descriptive data         | 14* | (a) Give characteristics of study participants (eg demographic, clinical, social) and information on exposures and potential confounders                                                                     | Page 12 and Table 1 |
|                          |     | (b) Indicate number of participants with missing data for each variable of interest                                                                                                                          | N/A                 |
| Outcome data             | 15* | Report numbers of outcome events or summary measures                                                                                                                                                         | Page 14-8           |
| Main results             | 16  | (a) Give unadjusted estimates and, if applicable, confounder-adjusted estimates and their precision (eg, 95% confidence interval). Make clear which confounders were adjusted for and why they were included | Page 18 and Table 4 |
|                          |     | (b) Report category boundaries when continuous variables were categorized                                                                                                                                    | Table 1             |
|                          |     | (c) If relevant, consider translating estimates of relative risk into absolute risk for a meaningful time period                                                                                             | N/A                 |
| Other analyses           | 17  | Report other analyses done—eg analyses of subgroups and interactions, and sensitivity analyses                                                                                                               | N/A                 |
| <b>Discussion</b>        |     |                                                                                                                                                                                                              |                     |
| Key results              | 18  | Summarise key results with reference to study objectives                                                                                                                                                     | Page 20-3           |
| Limitations              | 19  | Discuss limitations of the study, taking into account sources of potential bias or imprecision. Discuss both direction and magnitude of any potential bias                                                   | Page 24             |
| Interpretation           | 20  | Give a cautious overall interpretation of results considering objectives, limitations, multiplicity of analyses, results from similar studies, and other relevant evidence                                   | Page 24             |
| Generalisability         | 21  | Discuss the generalisability (external validity) of the study results                                                                                                                                        | Page 24             |
| <b>Other information</b> |     |                                                                                                                                                                                                              |                     |
| Funding                  | 22  | Give the source of funding and the role of the funders for the present study and, if applicable, for the original study on which the present article is based                                                | N/A                 |

\*Give information separately for cases and controls in case-control studies and, if applicable, for exposed and unexposed groups in cohort and cross-sectional studies.

**Note:** An Explanation and Elaboration article discusses each checklist item and gives methodological background and published examples of transparent reporting. The STROBE checklist is best used in conjunction with this article (freely available on the Web sites of PLoS Medicine at <http://www.plosmedicine.org/>, Annals of Internal Medicine at <http://www.annals.org/>, and Epidemiology at <http://www.epidem.com/>). Information on the STROBE Initiative is available at [www.strobe-statement.org](http://www.strobe-statement.org).

# BMJ Open

## Health facility service availability and readiness to provide basic emergency obstetric and newborn care in a low-resource setting: evidence from a Tanzania national survey

|                                 |                                                                                                                                                                                                  |
|---------------------------------|--------------------------------------------------------------------------------------------------------------------------------------------------------------------------------------------------|
| Journal:                        | <i>BMJ Open</i>                                                                                                                                                                                  |
| Manuscript ID                   | bmjopen-2017-020608.R2                                                                                                                                                                           |
| Article Type:                   | Research                                                                                                                                                                                         |
| Date Submitted by the Author:   | 05-Jun-2018                                                                                                                                                                                      |
| Complete List of Authors:       | Bintabara, Deogratus; The University of Dodoma, Public Health Ernest, Alex; The University of Dodoma, Obstetrics and Gynecology Mpondo, Bonaventura; The University of Dodoma, Internal Medicine |
| <b>Primary Subject Heading</b>: | Health services research                                                                                                                                                                         |
| Secondary Subject Heading:      | Health services research                                                                                                                                                                         |
| Keywords:                       | Availability and readiness, Obstetric and newborn care, Low-income countries                                                                                                                     |
|                                 |                                                                                                                                                                                                  |

SCHOLARONE™  
Manuscripts

1  
2  
3 1 **Health facility service availability and readiness to provide basic emergency obstetric and**  
4  
5 2 **newborn care in a low-resource setting: evidence from a Tanzania national survey**  
6  
7

8  
9 3 Deogratus Bintabara<sup>1\*</sup>, Alex Ernest<sup>2</sup>, Bonaventura C. Mpondo<sup>3</sup>

10  
11 4 <sup>1</sup>Department of Public Health, College of Health Sciences, The University of Dodoma,

12  
13 5 <sup>2</sup>Department of Obstetrics and Gynecology, College of Health Sciences, The University of

14  
15 6 Dodoma, <sup>3</sup>Department of Internal Medicine, College of Health Sciences, The University of

16  
17  
18 7 Dodoma

19  
20 8 **Deogratus Bintabara, M.D.** (Corresponding author)

21  
22 9 Department of Public Health, College of Health Sciences,

23  
24  
25 10 The University of Dodoma, Dodoma, Tanzania

26  
27 11 Phone: (255) 767 966 114, Email: bintabaradeo@gmail.com  
28  
29

30  
31 12 **Alex Ernest, M.D.**

32  
33 13 Department of Obstetrics and Gynecology, College of Health Sciences,

34  
35 14 The University of Dodoma, Dodoma, Tanzania

36  
37 15 Phone: (255) 767 625 828, Email: ibolinga@gmail.com  
38  
39

40  
41 16 **Bonaventura C. Mpondo, M.D.**

42  
43 17 Department of Internal Medicine, College of Health Sciences,

44  
45 18 The University of Dodoma, Dodoma, Tanzania

46  
47 19 Phone: (255) 688 530 690, Email: boniempondo@gmail.com  
48  
49

50  
51 20 **Keywords:** Availability and readiness, Obstetric and newborn care, Low-income countries  
52

53  
54 21 **Word count:** 4798; Abstract 287  
55  
56  
57 22

## 1 ABSTRACT

2 **Objective:** This study used a nationally-representative sample from Tanzania as an example of  
3 low-resource setting with a high burden of maternal and newborn deaths, to assess the  
4 availability and readiness of health facilities to provide Basic Emergency Obstetric and Newborn  
5 Care (BEmONC) and its associated factors.

6 **Design:** Health facility-based cross-sectional survey

7 **Setting:** We analyzed data for obstetric and newborn care services obtained from the 2014-2015  
8 Tanzania Service Provision Assessment survey, using World Health Organization-Service  
9 Availability and Readiness Assessment tool.

10 **Primary and secondary outcome measures:** Availability of seven signal functions were  
11 measured based on the provision of "parental administration of antibiotic," "parental  
12 administration of oxytocic," "parental administration of anticonvulsants," "assisted vaginal  
13 delivery," "manual removal of placenta," "manual removal of retained products of conception,"  
14 and 'neonatal resuscitation.'" Readiness was a composite variable measured based on the  
15 availability of supportive items categorized into three domains; staff training, diagnostic  
16 equipment, and basic medicines.

17 **Results:** Out of 1188 facilities, 905 (76.2%) reported to provide obstetric and newborn care  
18 services and therefore were included in the analysis of the current study. Overall availability of  
19 seven signal functions and average readiness score were consistently higher among hospitals  
20 than health centres and dispensaries ( $P<0.001$ ). Furthermore, the type of facility, performing  
21 quality assurance, regular reviewing of maternal and newborn deaths, reviewing clients' opinion,

1 and number of delivery beds per facility were significantly associated with readiness to provide  
2 BEmONC.

3 **Conclusion:** The study findings show disparities in the availability and readiness to provide  
4 BEmONC among health facilities in Tanzania. The Tanzanian Ministry of Health should  
5 emphasize quality assurance efforts and systematic maternal and newborn death audits. Health  
6 leadership should fairly distribute clinical guidelines, essential medicines, equipment, and  
7 refresher trainings to improve availability and quality BEmONC.

### 8 **Strengths and limitations of this study**

- 9 ➤ This is the first study in this region to identify factors associated with readiness to  
10 provide Basic Emergency Obstetric and Newborn Care using the recommended World  
11 Health Organization service readiness indicators, and data obtained from a nationally-  
12 representative sample.
- 13 ➤ By using a nationally-representative sample, this suggests that our findings accurately  
14 reflect the current situation regarding availability and readiness to provide Basic  
15 Emergency Obstetric and Newborn Care in low-resource setting such as Tanzania.
- 16 ➤ The findings were adjusted for clustering effect and weighted to correct for complex  
17 sampling procedure and non- response and disproportionate sampling respectively.
- 18 ➤ Being a cross-sectional in nature, the causal relationship could not be established.  
19 Therefore, the results should be interpreted with caution.
- 20 ➤ Misclassification bias, as a result of arbitrary cut-off point set at 50%, this might  
21 misclassify readiness of health facilities to provide BEmONC.



## 1 INTRODUCTION

2 Despite a global reduction of maternal and neonatal mortality over the past two  
3 decades,<sup>1,2</sup> approximately 800 women and 7700 newborns still die every day due to  
4 complications related to pregnancy, childbirth and postpartum.<sup>3,4</sup> It is estimated that 99% of  
5 these deaths occur in low and middle-income countries (LMICs),<sup>4</sup> while 85% are contributed by  
6 low-income countries (LICs) alone.<sup>5,6</sup> Tanzania is among the LICs that continuous to experience  
7 a high burden of maternal and newborn deaths. This is despite increased coverage of antenatal  
8 care provided by skilled providers (96 to 98%), facility delivery (50 to 63%), and births assisted  
9 by skilled providers (51 to 64%) between 2010 to 2016.<sup>7-10</sup> Recent reports showed a remarkable  
10 increase of Maternal Mortality Ratio (MMR) [from 454 to 556 maternal deaths per 100,000 live  
11 births], while Neonatal Mortality Ratio (NMR) remained unchanged [26-25 deaths per 1,000  
12 live births] between 2010 to 2016.<sup>9,10</sup> These estimates remain far from operational targets set by  
13 the Tanzanian Ministry of Health through the National Road Map Strategic Plan of 2008. This  
14 plan aimed to accelerate the reduction in maternal deaths to 193 per 100,000 live-births and  
15 neonatal deaths to 19 per 1000 live births in Tanzania by the end of 2015.<sup>11</sup> Given recent MMR  
16 estimates, one wonders whether Tanzania will be able to achieve targets for Sustainable  
17 Development Goal (SDG-3) to reduce maternal deaths to less than 70 in 100,000 live births and  
18 neonatal deaths to less than 12 per 1,000 live births at the end of 2030.<sup>12</sup>

19 This slow pace of MMR and NMR reduction observed in LIC including Tanzania, led the  
20 World Health Organization (WHO) to develop and recommend the availability of Basic  
21 Emergency Obstetric and Newborn Care (BEmONC) services in each health facility as key  
22 strategy to narrow disparities in global maternal and newborn deaths.<sup>4,13-15</sup> BEmONC is an  
23 integrated strategy that aims to equip health facilities to deal with major causes of direct obstetric

1  
2  
3 1 emergencies which account for the vast majority of maternal and newborn deaths, particularly in  
4  
5 2 high mortality countries.<sup>16,17</sup> This strategy comprises a package of seven key obstetric services or  
6  
7 “signal functions” including: 1) the ability of the facility to administer parenteral antibiotics, 2)  
8  
9 3 administer uterotonic drugs (parenteral oxytocin), 3) administer parenteral anticonvulsants (e.g  
10  
11 4 magnesium sulphate), 4) perform manual removal of placenta, 5) perform removal of retained  
12  
13 5 products of conception, 6) perform assisted vaginal delivery and 7) perform basic neonatal  
14  
15 6 resuscitation. Evidence has demonstrated that provision of BEmONC by skilled personnel results  
16  
17 7 in better maternal and newborn outcomes<sup>18</sup> and Tanzania and other LICs have partially  
18  
19 8 implemented this strategy. However, the majority of health facilities lack some or all seven  
20  
21 9 signal functions of BEmONC.<sup>18–20</sup> For example in Tanzania, national BEmONC assessment  
22  
23 10 survey of 2015 revealed that 13% of dispensaries, 28% of all health centres and 62% of hospitals  
24  
25 11 were capable of performing all seven signal functions.<sup>21</sup> These estimates are below the target that  
26  
27 12 require all hospitals and at least 70% of health centres and dispensaries to provide BEmONC  
28  
29 13 services.<sup>22</sup> Furthermore, it is contrary to the effort made by Tanzanian government on improving  
30  
31 14 maternal and newborn health such as developing number of policies and guidelines, as a  
32  
33 15 response from international and regional policies and agreements (Delhi Declaration of 2005),  
34  
35 16 that targets to reduce MMR and NMR.<sup>11,22,23</sup>

36  
37  
38  
39  
40  
41  
42  
43 18 Countries with low availability of BEmONC services also experienced a higher burden of  
44  
45 19 maternal and newborn deaths.<sup>1,24</sup> This correlation has been documented by previous studies and  
46  
47 20 many researchers have identified critical gaps on BEmONC that if addressed could reduce the  
48  
49 21 burden of high MMR and NMR in those countries.<sup>18,25</sup> However, the majority of previous studies  
50  
51 22 have concentrated on the assessment of services availability and few have assessed the readiness  
52  
53 23 of the facilities to provide BEmONC services.<sup>26–30</sup> In addition, these studies found low readiness  
54  
55  
56  
57  
58  
59  
60

1 of the facilities to provide BEmONC. Hence, there is little information regarding factors  
2 associated with low readiness of facilities to provide BEmONC in Tanzania. Better  
3 understanding of the factors associated with facility readiness to provide BEmONC is crucial  
4 area of study to support maternal and newborn health system improvements.

5 To that end, this study used a nationally-representative sample from Tanzania to assess  
6 the current extent of availability and readiness of health facilities to provide BEmONC services.  
7 Associated factors were also examined according to the type of facility and managing authority  
8 by using WHO Service Availability and Readiness Assessment (SARA) manual<sup>31</sup> with  
9 modification to some questions to fit the study setting.<sup>31</sup> The findings from this study will  
10 provide a crucial guidance on important factors that need to be addressed to strengthen the  
11 BEmONC services for policy-makers, administrators, and researchers in Tanzania and other  
12 LICs.

## 1       2 3       1    **METHODS**

### 4 5 6       2    **Data source**

7               The analyzed data of the current study was drawn from 2014-2015 Tanzania Service  
8  
9       4    Provision Assessment (TSPA) survey dataset. The 2014-2015 TSPA was undertaken by  
10  
11       5    Tanzania's National Bureau of Statistics (NBS) in collaboration with the Office of the Chief  
12  
13       6    Government Statistician (OCGS), Zanzibar, the Ministry of Health and Social Welfare  
14  
15       7    (MoHSW), Tanzania Mainland, and the Ministry of Health (MOH), Zanzibar. Technical support  
16  
17       8    for the survey was provided by ICF International under the Demographic and Health Survey  
18  
19       9    (DHS) program. The survey assessed the facilities regarding availability and readiness of  
20  
21       10   providing basic and essential health services, including the presence and function of components  
22  
23       11   essential for the delivery of quality service for all aspects including maternal, newborn and child  
24  
25       12   health care, family planning, and reproductive health services.

### 26 27       13   **Sample and Sampling procedure**

28  
29       14    The sampling procedure used in TSPA survey is reported elsewhere.<sup>32</sup> A random  
30  
31       15   stratified sampling of health facilities according to facility type, managing authority, and regions  
32  
33       16   was used to select a nationally-representative sample of 1200 facilities from the national master  
34  
35       17   facility list contains 7102 health facilities. The selection of desirable health facilities was  
36  
37       18   achieved after excluding seven facilities that refused to participate, four had closed on the  
38  
39       19   interview days, and one that could not be reached because of poor infrastructure. Then, a total of  
40  
41       20   1188 health facilities were assessed in 2014-2015 TSPA survey. However, after excluding 283  
42  
43       21   facilities that did not meet inclusion criteria (not providing any services related to maternal and  
44  
45       22   newborn health), a total of 905 health facilities were included in the current analysis.

## 1 **Data collection methods**

2           The 2014-2015 TSPA used four main types of questionnaires during data collection. The  
3 current analysis used data collected by the *Facility Inventory Questionnaire* and one variable  
4 regarding staff training from *Health Provider Questionnaire*. After pre-testing of the  
5 questionnaires, the finalized and corrected versions were used in the main 2014-2015 TSPA  
6 survey data collection between October 20, 2014 – February 21, 2015. Additional, visits of  
7 some facilities that were not covered previously were conducted from March 2-13, 2015. The  
8 data collection was performed by 67 nurses who were trained for four weeks and were qualified  
9 by a series of practical tests and examinations to be interviewers. Following the training, 20  
10 teams were formed (2 for Zanzibar and 18 for Tanzania Mainland). Each team consisted of a  
11 team leader, 3 interviewers and a driver. On average, the data collection process lasted one day at  
12 a small facility (dispensary clinics and some health centres) and two or three days for large  
13 facilities (mostly hospitals). All collected data regarding the health facility service availability  
14 and readiness were provided by the manager, the person-in-charge of the facility, or the most  
15 senior health worker responsible for the client services present at the facility. The interviewers  
16 observed and verified the presence of valid or functioning reported services or supplies.

## 17 **Measurement of variables**

18           Based on our research questions; the current study identified two outcome variables  
19 which were “BEmONC services availability” and “BEmONC services readiness”. These  
20 variables were measured by using the WHO methods of assessing facility service availability and  
21 readiness. Hence, “BEmONC services availability” in this study is defined as “physical presence  
22 of the services related with provision of BEmONC. This was measured based on whether the  
23 following seven signal functions have ever been carried out by providers as part of their work

1 within facility at least once during the past 3 months: “parental administration of antibiotic,”  
2 “parental administration of oxytocic,” “parental administration of anticonvulsants,” “assisted  
3 vaginal delivery,” “manual removal of placenta,” “manual removal of retained products of  
4 conception,” and ‘neonatal resuscitation.’”

5 “BEmONC services readiness” in this study is defined as the willingness or preparedness  
6 of the facility to provided BEmONC. This was measured based on the availability and  
7 functioning of supportive items categorized into three domains (groups) as follows; the first  
8 domain was staff training that had two indicators which were the presence of guidelines and at  
9 least one staff who had received any formal or structured in-service training (refresher training)  
10 related to the services offered in the 24 months preceding the assessment. The second domain  
11 was diagnostic equipment which had eleven indicators i.e presence of “emergency transport,”  
12 “sterilization equipment,” “examination light,” “delivery pack,” “suction apparatus,” “manual  
13 vacuum extractor,” “vacuum aspirator or D&C kit,” “neonatal bag and mask,” “delivery bed,”  
14 “Partograph,” and “gloves.” The third domain was basic medicine and commodities which had  
15 eleven indicators contains essential medicines for delivery and newborn i.e “injectable  
16 antibiotic,” “injectable uterotonic,” “injectable magnesium sulfate,” “injectable diazepam,”  
17 “intravenous fluids,” “skin disinfectant,” “antibiotic eye ointment,” “4% chlorhexidine,”  
18 “injectable gentamicin,” “injectable ceftriaxone,” and “amoxicillin suspension.” The BEmOC  
19 service readiness was then created as a composite score by adding the presence of each indicator,  
20 with equal weight given to each of the domains and each of the indicators within the domains. As  
21 the expected target was 100%, each domain accounted for 33.3% (100%/3) of the total score.  
22 The percent for each indicator within the domain was equal to 33.3% divided by the number of  
23 indicators in that domain. The BEmONC service readiness score for each facility was then

1  
2  
3 1 calculated by adding the percentages. Given that the readiness score is a relative measurement,  
4  
5 2 then facilities that scored 50% or more were considered to be ready to provide BEmONC  
6  
7 3 services than those scored less than 50% in BEmONC readiness score. This cut-off point of 50%  
8  
9 4 was also used in previous studies.<sup>33,34</sup>  
10  
11  
12

13 5 The outcome variables were examined against selected potential explanatory variables  
14  
15 6 that we proposed as key variables that influence the availability or readiness of the health facility  
16  
17 7 to provide BEmONC services. These variables were: facility location was coded as "0" for urban  
18  
19 8 and "1" for Rural. The facility type was coded as "0" for clinic or dispensary, "1" for a health  
20  
21 9 centre, and "2" for a Hospital. Managing authority was coded as "0" for a public facility and "1"  
22  
23 10 for the private facility. Duty schedule for 24 hours was coded as "Yes" for the facility that had a  
24  
25 11 duty schedule or call list for 24 hours staff assignment, otherwise, the facility was coded as "No."  
26  
27 12 Quality assurance was coded as "performed" for facility reported to perform quality assurance at  
28  
29 13 least once per year, otherwise the facility was coded as "not performed." Maternal or newborn  
30  
31 14 deaths were coded as "reviewed" for the facility that conducted regular reviews of maternal or  
32  
33 15 newborn deaths or near-misses, otherwise, the facility was coded as "not reviewed." Clients'  
34  
35 16 opinions was coded as "reviewed" for facility reported having a system of determining and  
36  
37 17 reviewing clients' opinion, otherwise, the facility was coded as "not reviewed." A number of  
38  
39 18 staffs and number of beds per facility remained as discrete quantitative variables.  
40  
41  
42  
43  
44  
45

## 46 19 **Statistical analysis**

47  
48 20 Data were analyzed using Stata 14 (StataCorp, College Texas). For all the analyses, the  
49  
50 21 "svy" set command in Stata was used to adjust for the complex sampling design employed by  
51  
52 22 TSPA survey. Moreover, as the facilities sampled were not evenly distributed and the response  
53  
54 23 rate might be very different by regions or facility type, then over and under-sampled in the  
55  
56  
57  
58  
59  
60

1 regions with fewer and more facilities respectively were performed before data collection.  
2  
3  
4  
5  
6  
7  
8  
9  
10  
11  
12  
13  
14  
15  
16  
17  
18  
19  
20  
21  
22  
23  
24  
25  
26  
27  
28  
29  
30  
31  
32  
33  
34  
35  
36  
37  
38  
39  
40  
41  
42  
43  
44  
45  
46  
47  
48  
49  
50  
51  
52  
53  
54  
55  
56  
57  
58  
59  
60

1 regions with fewer and more facilities respectively were performed before data collection.  
2 Therefore, before analysis, facility weight was used to restore the actual representativeness of the  
3 facilities sampled.

4 In the descriptive analysis, continuous variables were summarized using either mean  
5 (SD) for normally distributed variables or median (IQR) for non-normal distributed variables.  
6 All categorical variables were summarized using proportions and then presented in tables and  
7 graphs. Bivariate and multivariate regression models were fitted to assess the existence of the  
8 association between the outcome variable (BEmONC service readiness) and the explanatory  
9 variables. As the aim was to fit a final model that predicts well the association, the objective  
10 criterion-based method was used to include or exclude variable in the multiple regression  
11 models. A *t*-test for each of the coefficient in multiple regression model was calculated and used  
12 to test for the association. A *P*-value of less than 0.05 was considered indicative of statistically  
13 significant difference.

14 Normality of the residuals, this was assessed by using “swilk test,” which based on the  
15 assumption that the distribution of the residuals is normal. Although it gave a *P*-value < 0.05, the  
16 violation of this assumption in a large sample size (e.g., where the number of observations per  
17 variable is > 10) like the one used in this analysis often do not noticeably impact results.<sup>35</sup> A  
18 multicollinearity, the term refers to the condition when the explanatory variables are correlated to  
19 each other in multiple regression models while in fact they are supposed to be independent has  
20 been assessed. The generalized variance inflation factor (VIF) was performed to test for  
21 multicollinearity, which usually should not exceed 5.<sup>36</sup> In this analysis each variable presented  
22 with VIF<2.0, suggesting the absence of multicollinearity in the final model. The homogeneity  
23 of variance of the residuals (homoscedasticity) was checked by using “Breusch-Pagan test”



1 which test that the null hypothesis of the variance of the residuals is homogenous. As the test  
2 gave a *P*-value of 0.31, we accepted the null hypothesis that the variance was homogenous.

### 3 **Ethics statement**

4 This study was based on an analysis of existing public domain survey data sets that are  
5 freely available online with all identifier information detached. The survey was approved by the  
6 Ethics Committee of the ICF Macro at Calverton in the USA and by the National Institute of  
7 Medical Research Ethics Committee in Tanzania. Informed consent was requested and obtained  
8 from participants before the interview.

### 9 **Patient and Public Involvement Statement**

10 Patient and public were not involved in the analysis of this study.

## 11 **RESULTS**

### 12 **General characteristics of surveyed facilities**

13 Table 1 presents a summary of the general characteristics of the included health facilities.  
14 Out of 1188 facilities involved in the TSPA survey, 905 (76.18%) reported to provide delivery  
15 and newborns care services and therefore were included in the analysis of the current study.  
16 More than 80% of the facilities were located in rural area and publicly owned. Less than 30% of  
17 the facilities regularly reviewed maternal and newborn deaths or "near-misses" cases that  
18 occurred within the facility. Overall, the number of staffs per facility was low with a median  
19 (IQR) of 3 (2 - 6).

1 **Table 1 Percent distribution of surveyed facilities according to background characteristics,**  
 2 **TSPA 2014-2015 (N=905).**

| Variable                                    | n (%)       |
|---------------------------------------------|-------------|
| <b>Facility location</b>                    |             |
| Rural                                       | 773 (85.41) |
| Urban                                       | 132 (14.59) |
| <b>Facility type</b>                        |             |
| Clinic & dispensary                         | 751 (82.98) |
| Health center                               | 110 (12.16) |
| Hospital                                    | 44 (4.86)   |
| <b>Managing authority</b>                   |             |
| Public                                      | 756 (83.54) |
| Private                                     | 149 (16.46) |
| <b>Duty schedule for 24 hours</b>           |             |
| Yes                                         | 256 (28.29) |
| No                                          | 649 (71.71) |
| <b>Quality assurance</b>                    |             |
| Performed                                   | 149 (16.46) |
| Not performed                               | 756 (83.54) |
| <b>Maternal/newborn deaths</b>              |             |
| Reviewed                                    | 182 (20.11) |
| Not reviewed                                | 723 (79.89) |
| <b>Clients' opinions</b>                    |             |
| Reviewed                                    | 272 (30.06) |
| Not reviewed                                | 633 (69.94) |
| <b>Number of staffs per facility</b>        |             |
| Median (IQR)                                | 3 (2,6)     |
| <b>Number of delivery beds per facility</b> |             |
| Mean (SD)                                   | 1.41 (1.02) |

3 **IQR: Interquartile range; SD: Standard deviation**

## 1 **Seven signal functions for BEmONC by type of facility and managing authority**

2 Table 2, shows the distribution of the availability of seven signal function for BEmONC  
3 by type of facility and managing authority. Overall availability of these seven signal functions  
4 (parental administration of the antibiotic, parental administration of oxytocic, parental  
5 administration of anticonvulsant, assisted vaginal delivery, manual removal of placenta, manual  
6 removal of retained products of conception, and neonatal resuscitation) were consistently higher  
7 among hospitals than health centers and dispensaries ( $P<0.001$ ). Despite the fact that private  
8 facilities consistently reported the higher availability of these seven signal functions compared to  
9 public facilities, only parental administration of the antibiotic, parental administration of  
10 anticonvulsants, and neonatal resuscitation were significantly higher in private facilities  
11 ( $P<0.001$ ). Regardless of facility type and managing authority, majority of the facilities reported  
12 high availability of parental administration of oxytocic (83.61%), assisted vaginal delivery  
13 (69.60%), and neonatal resuscitations (52.14%) while less than half of all facilities reported  
14 availability of manual removal of retained products of conception (35.36%), parental  
15 administration of antibiotic (34.01%), manual removal of placenta (33.95%), and parental  
16 administration of anticonvulsants (13.35%).

1  
2  
3 **Table 2 Percentage distribution of seven signal functions for Basic Emergency Obstetric and Newborn Care services by type of**  
4  
5 **facility and managing authority, TSPA 2014-2015 (N=905).**  
6

| Variable                                                   | Facility type               |                        |                   | Managing authority |                  | Total<br>n (%) |
|------------------------------------------------------------|-----------------------------|------------------------|-------------------|--------------------|------------------|----------------|
|                                                            | Dispensary/<br>Clinic n (%) | Health centre<br>n (%) | Hospital<br>n (%) | Public<br>n (%)    | Private<br>n (%) |                |
| Parental administration of antibiotic                      | 205 (27.32)                 | 66 (60.01)             | 37 (83.95)*       | 242 (32.04)        | 66 (44.03)*      | 308 (34.01)    |
| Parental administration of oxytocin                        | 614 (81.77)                 | 100 (90.94)            | 42 (96.86)*       | 633 (83.69)        | 123 (83.16)      | 756 (83.61)    |
| Parental administration of<br>anticonvulsants              | 52 (6.96)                   | 35 (31.59)             | 34 (77.56)*       | 83 (10.93)         | 38 (25.63)*      | 121 (13.35)    |
| Assisted vaginal delivery                                  | 511 (68.00)                 | 80 (72.85)             | 39 (88.94)*       | 525 (69.50)        | 104 (70.11)      | 629 (69.60)    |
| Manual removal of placenta                                 | 227 (30.22)                 | 50 (45.34)             | 30 (69.66)*       | 248 (32.87)        | 59 (39.46)       | 307 (33.95)    |
| Manual removal of retained products<br>of conception       | 234 (31.10)                 | 56 (51.35)             | 30 (68.56)*       | 264 (34.88)        | 56 (37.79)       | 320 (35.36)    |
| Neonatal resuscitation                                     | 352 (46.78)                 | 80 (73.05)             | 40 (92.03)*       | 383 (50.64)        | 89 (59.76)*      | 472 (52.14)    |
| Number of facilities providing<br>normal delivery services | 751                         | 110                    | 44                | 756                | 149              | 905            |

28  
29  
30  
31  
32  
33  
34  
35  
36  
37  
38  
39  
40  
41  
42  
43  
44  
45  
46  
47

3 \* = *P*-value <0.001

## 1 **Availability of important supportive items for delivery and newborns care services**

2 **Human resources (staff training):** Only (206, 22.75%) facilities reported having at least  
3 one staff who had received refresher training in delivery and newborn care. Also about one-third  
4 (270, 29.80%) of facilities reported having recommended guidelines related to delivery and  
5 newborn care.

6 **Essential equipment and supplies:** Overall, the majority (890, 98.35%) of facilities  
7 reported dedicating at least one bed for delivery purposes, (780, 86.24%) had sterile gloves, (760,  
8 84.05%) had delivery packs, and (692, 76.48%) had a neonatal bags and masks for resuscitation.  
9 However, less than a quarter of facilities reported having suction apparatus (23.14%),  
10 sterilization equipment (20.75%), examination light (14.37%), vacuum aspirator or dilatation and  
11 curettage D&C kit (7.51%), or manual vacuum extractor (5.31%).

12 **Medicines and commodities:** Regarding availability of essential medicines for delivery,  
13 injectable uterotonic (78.81%), skin disinfectant (61.10%), and injectable diazepam (55.23%)  
14 were highly reported. While intravenous fluids (48.15%), injectable magnesium sulfate (40.77%),  
15 injectable antibiotic (32.11%) were not widely available. On the other hand, regarding essential  
16 medicines for newborn care, more than half of facilities reported availability of amoxicillin  
17 suspension (62.90%) and injectable ceftriaxone (56.69%) while less than one-third of facilities  
18 reported availability of injectable gentamicin (29.54%), antibiotic eye ointment (28.05%), and  
19 4% chlorhexidine (11.95%) (Table 3).

1 **Table 3 Percentage distribution of readiness indicators for providing Basic Emergency**  
 2 **Obstetric and Newborn Care services, TSPA 2014-2015 (N=905).**

| Variable                         | n (%)       |
|----------------------------------|-------------|
| <b>Staff and training</b>        |             |
| Presence of guidelines           | 270 (29.80) |
| Availability of trained staff    | 206 (22.75) |
| <b>Equipment and supplies</b>    |             |
| Emergency transport              | 567 (62.54) |
| Sterilization equipment          | 188 (20.75) |
| Examination light                | 130 (14.37) |
| Delivery pack                    | 760 (84.05) |
| Suction apparatus                | 209 (23.14) |
| Manual vacuum extractor          | 48 (5.31)   |
| Vacuum aspirator or D&C kit      | 68 (7.51)   |
| Neonatal bag and mask            | 692 (76.48) |
| Delivery bed                     | 890 (98.35) |
| Partograph                       | 520 (57.51) |
| Gloves                           | 780 (86.24) |
| <b>Medicines and commodities</b> |             |
| Essential medicines for delivery |             |
| Injectable antibiotic            | 291 (32.11) |
| Injectable uterotonic            | 713 (78.81) |
| Injectable magnesium sulfate     | 368 (40.77) |
| Injectable diazepam              | 500 (55.23) |
| Intravenous fluids               | 436 (48.15) |
| Skin disinfectant                | 553 (61.10) |
| Essential medicines for newborns |             |
| Antibiotic eye ointment          | 254 (28.05) |
| 4% chlorhexidine                 | 108 (11.95) |
| Injectable gentamicin            | 267 (29.54) |
| Injectable ceftriaxone           | 513 (56.69) |
| Amoxicillin suspension           | 569 (62.90) |

3

4

## 1 **Facility readiness to provide BEmONC services**

2 Figure 1 shows the readiness score corresponding to the three domains and the overall  
3 index of facility readiness to provide BEmONC. Each of the three domains had an average  
4 readiness score of less than 50% based on the indicators suggested by WHO-SARA manual, that  
5 yield overall mean readiness score (SD) of 40.3 (17.6)%. However, 267 (29.50%) of all health  
6 facilities had overall percentage readiness score of 50% or more, therefore, were considered  
7 ready to provide BEmONC services.

## 8 **Overall BEmONC readiness score according to the type of facility and managing authority**

9 The overall readiness score was found to differ significantly according to the type of  
10 facility, with a higher score among hospitals compared to dispensaries ( $P<0.001$ ). However,  
11 there was no difference in the overall readiness score according to the managing authority at  
12 each level of facility type ( $P>0.05$ ) (Figure 2).

## 13 **Factors associated with facility readiness to provide BEmONC services**

14 Table 4 presents the results of the bivariate and multivariate analysis. In bivariate analysis,  
15 all explanatory variables showed association with outcome variable “BEmONC service readiness”  
16 at  $P<0.05$ , therefore, were selected and included in multiple regression models by using objective  
17 criterion-based methods to predict their association with readiness to provide BEmONC services.  
18 The results of multiple regression analysis showed that the readiness of facility to provide  
19 BEmONC services was higher at health centres (11.54 percentage points better than dispensary  
20 and clinics), at facilities which performed quality assurance (5.45 percentage points better than  
21 those not performed), at facilities reported regular reviewing maternal, newborn deaths or “near-  
22 misses” (6.49 percentage points better than those not reviewed), at facilities that reviewed clients  
23 opinion about health facility or its services (4.29 percentage points better than those not reviewed

1 clients opinions), and facility with more delivery beds (2.44 percentage points for each doubling  
 2 of bed per facility).

3 **Table 4 Results of unadjusted and adjusted multiple regression models of factors**  
 4 **associated with readiness to provide Basic Emergency Obstetric and Newborn Care**  
 5 **services, TSPA 2014-2015 (N=905).**

| Variable                                                                | Unadjusted |           | Adjusted          |           |
|-------------------------------------------------------------------------|------------|-----------|-------------------|-----------|
|                                                                         | Coef       | Std error | Coef <sup>A</sup> | Std error |
| <b>Facility location</b> (ref: Rural)                                   |            |           |                   |           |
| Urban                                                                   | 8.64**     | 2.29      | 0.20              | 2.08      |
| <b>Facility type</b> (ref: clinic/dispensary)                           |            |           |                   |           |
| Health center                                                           | 18.15**    | 1.24      | <b>11.54**</b>    | 2.02      |
| Hospital                                                                | 26.09**    | 2.54      | 8.06              | 4.15      |
| <b>Managing authority</b> (ref: Public)                                 |            |           |                   |           |
| Private                                                                 | 8.46**     | 1.90      | 3.56              | 1.87      |
| <b>Duty schedule for 24 hours</b> (ref: No)                             |            |           |                   |           |
| Yes                                                                     | 12.28**    | 1.62      | 0.52              | 2.13      |
| <b>Quality assurance</b> (ref: Not performed)                           |            |           |                   |           |
| Performed                                                               | 14.24**    | 2.36      | <b>5.45*</b>      | 2.44      |
| <b>Maternal/newborn deaths</b> (ref: Not reviewed)                      |            |           |                   |           |
| Reviewed                                                                | 14.76**    | 1.76      | <b>6.49**</b>     | 1.89      |
| <b>Clients' opinions reviewed</b> (ref: No)                             |            |           |                   |           |
| Yes                                                                     | 9.90**     | 1.74      | <b>4.29*</b>      | 1.68      |
| <b>Number of staffs per facility</b><br>(as continuous variable)        | 0.09**     | 0.04      | -0.001            | 0.013     |
| <b>Number of delivery beds per facility</b><br>(as continuous variable) | 6.28**     | 0.58      | <b>2.44*</b>      | 0.83      |

6 \*  $P < 0.05$ ; \*\*  $P < 0.001$ .

7 **Coef: Coefficient; Std: Standard error.**

8 <sup>A</sup>**Adjusted coefficient: Each variable in the model has been adjusted by all variables.**



## 1 DISCUSSION

2 This study used a nationally-representative data from Tanzania as an example of low-  
3 resource country to assess the availability and readiness of health facilities to provide BEmONC  
4 services among health facilities. The study findings indicate a relatively poor readiness of  
5 Tanzanian health facilities to provide BEmONC services. The observed scarcity of human  
6 resource (trained providers), essential diagnostic equipment, and basic medicine resulted into  
7 poor readiness of the facilities to provide BEmONC. The observed poor facility readiness to  
8 provide BEmONC in this study, extend the findings from other studies across different regions  
9 of LICs.<sup>37,38</sup> These findings continuous to highlight essential gaps in delivery maternal and  
10 newborn services that are obstacles to universal access to health services.<sup>39</sup> Therefore, the  
11 findings have greater implications for the improvement of emergency obstetric care in Tanzania  
12 and other LICs.

13 Availability of seven signal functions for BEmONC is crucial to reduce maternal and  
14 neonatal mortality.<sup>40</sup> The current study found disparities in the availability of these seven signal  
15 functions according to the type of facility and managing authority. Despite the fact that private  
16 facilities consistently reported the higher availability of the seven signal functions compared to  
17 public facilities, only three signal functions; parental administration of the antibiotic, parental  
18 administration of anticonvulsants, and neonatal resuscitation were significantly more reported in  
19 privately owned than publicly owned facilities. Similarly, hospitals were found to report  
20 significantly more availability of the signal functions than lower-level facilities (health centres  
21 and dispensaries). These findings are in agreement with the findings of a study conducted in  
22 Haiti in 2014.<sup>41</sup> The similarity of the findings of these studies might be due to the similar  
23 methodology used; both studies used data from the national representative sample collected by

1  
2  
3 1 DHS program. Therefore, the questionnaire used for the interviews were nearly similar. Also,  
4  
5 2 Tanzania and Haiti share socio-economic determinants as these two countries are both LICs.  
6  
7

8  
9 3 Furthermore, our results indicate that availability of parental administration of  
10  
11 4 anticonvulsants (magnesium sulfate) is still a challenge and as a result, it compromises the  
12  
13 5 provision of BEmONC in Tanzania particularly in public and lower-level health facilities. The  
14  
15 6 similar finding has been reported in another low-resource setting.<sup>42</sup> Inadequate availability of this  
16  
17 7 important component of BEmONC, might led to unnecessary delays to prevent or intervene pre-  
18  
19 8 eclampsia/eclampsia that is one of the three leading causes of maternal morbidity and  
20  
21 9 mortality.<sup>43</sup> Together with other suboptimal availability of parental administration of antibiotic,  
22  
23 10 manual removal of placenta and retained products of conception suggesting that, despite the  
24  
25 11 increased coverage of antenatal care, facility deliveries, and postnatal care, these efforts alone  
26  
27 12 can not reduce MMR and NMR without improving the availability of BEmONC services.<sup>44,45</sup>  
28  
29 13 The low availability of seven signal functions in the public and lower-level facilities in Tanzania  
30  
31 14 is further impacted by the current long process of ordering and delivering of drugs and medical  
32  
33 15 supplies through a system called Integrated Logistic System (ILS). With this system, facility  
34  
35 16 places its order through District Medical Officer's (DMO) office to the Medical Department  
36  
37 17 Store (MSD), a body that operates under Ministry of Health responsible for managing all the  
38  
39 18 procurement and supply of medical items concerning public facilities.<sup>46</sup> Hence, any faults or  
40  
41 19 delays in the ordering system may result in the low availability of items or services in the  
42  
43 20 facilities. These delays will compromise efforts towards achieving targets set by the Tanzanian  
44  
45 21 government that all hospitals and at least 70% of health centres and dispensaries be able to  
46  
47 22 provide BEmONC services at the end of 2020.<sup>22</sup>  
48  
49  
50  
51  
52  
53  
54  
55  
56  
57  
58  
59  
60

1  
2  
3 1 Facility readiness is an important aspect that demonstrate facility's commitment to  
4  
5 2 ensuring cumulative availability of components required to provide a specific service.<sup>31</sup> Our  
6  
7 3 analysis identified the significant difference of BEmONC readiness according to the type of  
8  
9 4 facility, in which higher-level facilities (hospitals) were found to have high readiness score  
10  
11 5 compared to lower-level facilities (dispensaries/clinics). The suboptimal readiness observed in  
12  
13 6 the lower-level facilities might be due to unclear formula on how to allocate funds in these  
14  
15 7 facilities that may contribute to insufficiencies and inequities in the distribution of medical  
16  
17 8 supplies.<sup>46</sup> The strengthening of the lower-level facilities which are usually located in the rural  
18  
19 9 areas and serve about 75% of Tanzanian population is highly needed to address the increasing  
20  
21 10 burden of maternal and neonatal deaths. The finding is in agreement with the previous study  
22  
23 11 conducted in Kenya.<sup>30</sup>

24  
25  
26  
27  
28  
29 12 Quality assurance is a process that aims to promote a high standard of the service  
30  
31 13 provision within healthcare systems.<sup>47</sup> The results of this study show that facilities that  
32  
33 14 performed quality assurance were more likely to be ready to provide BEmONC services  
34  
35 15 compared to facilities not engaged in quality assurance activities. This might be due to the fact  
36  
37 16 that, quality assurance involves continuous monitoring and persistent feedback to improve  
38  
39 17 services offered.<sup>48</sup> Therefore, based on recommendations from quality assurance teams, these  
40  
41 18 facilities are more likely to improve the availability of services that may result in their high  
42  
43 19 readiness score. However, the uptake of quality improvement and quality assurance activities  
44  
45 20 remains low within the Tanzanian health system as a small number of health facilities regular  
46  
47 21 perform such activities.<sup>49</sup>

48  
49  
50  
51  
52  
53 22 Each maternal or newborn death has a story to tell,<sup>50</sup> therefore, review of these deaths is  
54  
55 23 widely recognized as a recommended tool to improve obstetric and neonatal care.<sup>51</sup> Our results

1  
2  
3 1 show that facilities which perform maternal and newborn death reviews were more likely to be  
4  
5 2 ready to provide BEmONC services compared to facilities that did not perform these reviews. It  
6  
7 3 may be that facilities that perform death reviews use that information to improve BEmONC  
8  
9 4 service availability and readiness. Despite the maternal death reviews have been imposed over  
10  
11 5 the past two decades as the national policy to improve the quality of BEmONC services the  
12  
13 6 results show that majority of Tanzania health facilities do not regularly perform such kind of  
14  
15 7 reviews.<sup>52</sup> Therefore, the number of facilities miss the opportunity of reflection and direct  
16  
17 8 feedback to improve the BEmONC services.<sup>53,54</sup>  
18  
19  
20  
21

22 9 Also, clients' opinions are beneficial parameter for judging the availability and readiness  
23  
24 10 of the facility to provide specific services. The results of this study indicate that facilities which  
25  
26 11 review clients' opinion were more likely to be ready to provide BEmONC services. This might  
27  
28 12 be explained by the fact that clients' opinions not only reflects the satisfaction with service  
29  
30 13 received but also provide positive and negative feedback towards services provided by facility or  
31  
32 14 health providers.<sup>55</sup> This feedback may be used to correct the shortcomings highlighted by  
33  
34 15 patients, hence improve the availability of services that are important aspect to assess the  
35  
36 16 readiness of the facility to provide services. However, we also found low number of health  
37  
38 17 facilities that regularly collect and review clients' opinion regarding the provision of maternal  
39  
40 18 and newborn services.  
41  
42  
43  
44  
45

46 19 The availability of delivery beds is very important in the health facility for both mother  
47  
48 20 and health provider to support the childbirth.<sup>56,57</sup> Therefore, facilities having delivery beds  
49  
50 21 express their commitment towards the provision of BEmONC. The current study provides  
51  
52 22 evidence that facilities with many numbers of delivery beds were more likely to be ready to  
53  
54 23 provide BEmONC than those without or with the fewer number of delivery beds. However, the  
55  
56  
57  
58  
59  
60

1  
2  
3 1 unreliability of delivery beds and other medical supplies within health facilities in Tanzania have  
4  
5 2 been highlighted as among the barriers of timely provision of BEmONC. This might be related to  
6  
7 3 inadequate budgeting from central government, insufficient ordering of BEmONC supplies,  
8  
9 4 stock outages at MSD, and lack of accountability within the supply system.<sup>45</sup>  
10  
11  
12

13 5 The strength of the current study is that it analyzed a nationally-representative sample of  
14  
15 6 health facilities in Tanzania, providing key insight into the BEmONC availability and readiness  
16  
17 7 in the LICs with higher MMR and NMR. It provides important information about the current  
18  
19 8 situation regarding availability and readiness of facilities to provide BEmONC in a resource-  
20  
21 9 constrained environment. Since TSPA survey employed complex sampling procedures, the  
22  
23 10 estimates were adjusted for clustering effect and weighted to correct for non-response and  
24  
25 11 disproportionate sampling. However, the study has some limitations. As it was a cross-sectional  
26  
27 12 survey, the causal relationship could not be assessed. Therefore, the results should be interpreted  
28  
29 13 with caution. Also, the study is subjected to misclassification bias as a result of arbitrary cut-off  
30  
31 14 point set at 50%; this might be misclassified readiness of health facilities to provide BEmONC  
32  
33 15 services. Though, the effect of this bias has been minimized by inclusion of many indicators as  
34  
35 16 suggested by WHO to assess the level of facility readiness.  
36  
37  
38  
39  
40

41 17 In summary, the results of this study indicate disparities in the availability of seven signal  
42  
43 18 functions and readiness to provide BEmONC services among health facilities in Tanzania. It also  
44  
45 19 highlighted the gaps in the availability of important supportive items such as refresher training  
46  
47 20 and clinical guidelines for the provision of BEmONC. To improve the quality of BEmONC  
48  
49 21 services, there are key steps that government authorities might consider. These includes:- the  
50  
51 22 emphasis on quality assurance and quality improvement activities and implementation of regular  
52  
53 23 maternal and newborn death audits. In order to improve BEmONC services, the health system  
54  
55  
56  
57

1  
2  
3  
4  
5  
6  
7  
8  
9  
10  
11  
12  
13  
14  
15  
16  
17  
18  
19  
20  
21  
22  
23  
24  
25  
26  
27  
28  
29  
30  
31  
32  
33  
34  
35  
36  
37  
38  
39  
40  
41  
42  
43  
44  
45  
46  
47  
48  
49  
50  
51  
52  
53  
54  
55  
56  
57  
58  
59  
60

1 leaders should implement strategies to better ensure fair distribution of clinical guidelines,  
2 essential medicines, equipment, and refresher training. Additional studies may be useful to  
3 ensure effective implementation of government policies to support the readiness of health  
4 facilities to provide BEmONC services.

5

For peer review only

## 1 **Authors' contributions**

2 DB conceptualized and designed the study, performed statistical analysis and wrote the first and  
3 revised draft of the manuscript. AE involved in the interpretation of data revised and edited the  
4 manuscript. BCM provided advice on statistical analysis, interpretation of data, and edited the  
5 manuscript; All authors read and approved the final manuscript.

## 6 **Acknowledgment**

7 We would like to acknowledge ICF International, Rockville, Maryland, USA, through DHS  
8 program for permitting us to access the Tanzania SPA 2014-2015 dataset.

## 9 **Funding**

10 This research received no specific grant from any funding agency in the public, commercial or  
11 not-for-profit sectors.

## 12 **Competing interest**

13 None to declare.

## 14 **Provenance and peer review**

15 Not commissioned; externally peer reviewed.

## 16 **A data sharing statement**

17 The datasets generated during the current study are available from within the Demographic and  
18 Health Survey Program repository: <http://dhsprogram.com/data/available-datasets.cfm>

19

## 1 REFERENCES

- 2 1 World Health Organization (WHO). Trends in Maternal Mortality : 1990 to 2015:  
3 Estimates by WHO, UNICEF, UNFPA, The World Bank and the United Nations  
4 Population Division. WHO. 2015. doi:ISBN 978 92 4 156514 1
- 5 2 Wang H, Bhutta ZA, Coates MM, *et al.* Global, regional, national, and selected  
6 subnational levels of stillbirths, neonatal, infant, and under-5 mortality, 1980–2015: a  
7 systematic analysis for the Global Burden of Disease Study 2015. *Lancet* 2016;**388**:1725–  
8 74. doi:10.1016/S0140-6736(16)31575-6
- 9 3 Wang H, Liddell CA, Coates MM, *et al.* Global, regional, and national levels of neonatal,  
10 infant, and under-5 mortality during 1990–2013: a systematic analysis for the Global  
11 Burden of Disease Study 2013. *Lancet* 2014;**384**:957–79. doi:10.1016/S0140-  
12 6736(14)60497-9
- 13 4 World Health Organization (WHO). Maternal mortality fact sheet. 2015. Available from:  
14 <http://www.who.int/mediacentre/factsheets/fs348/en/> Accessed 5 March 2018.
- 15 5 Say L, Chou D, Gemmill A, *et al.* Global causes of maternal death: a WHO systematic  
16 analysis. *Lancet Glob Heal* 2014;**2**:e323–33. doi:10.1016/S2214-109X(14)70227-X
- 17 6 Lawn JE, Cousens S, Zupan J. 4 million neonatal deaths: When? Where? Why? *Lancet*  
18 2005;**365**:891–900. doi:10.1016/S0140-6736(05)71048-5
- 19 7 Alkema L, Chou D, Hogan D, *et al.* Global , regional , and national levels and trends in  
20 maternal mortality between 1990 and 2015 , with scenario-based projections to 2030 : a  
21 systematic analysis by the UN Maternal Mortality Estimation Inter-Agency Group. *Lancet*



- 1  
2  
3 1 2015;**6736**:1–13. doi:10.1016/S0140-6736(15)00838-7  
4  
5  
6 2 8 Lawn J, Mongi P, Cousens S. Opportunities for Africa’s Newborns: Africa’s newborns –  
7  
8 3 counting them and making them count. 2006. doi:10.1016/S0140-6736(06)91254-7  
9  
10  
11 4 9 National Bureau of Statistics (NBS) [Tanzania] and ICF Macro. 2011. Tanzania  
12  
13 Demographic and Health Survey 2010. Dar es Salaam, Tanzania: NBS and ICF Macro.  
14  
15 Available form:  
16  
17 6  
18 7 <https://dhsprogram.com/pubs/pdf/FR243/FR243%5B24June2011%5D.pdf> Accessed 5  
19  
20 8 March 2018.  
21  
22  
23  
24 9 10 Ministry of Health, Community Development, Gender, Elderly and Children  
25  
26 10 (MoHCDGEC) [Tanzania Mainland], Ministry of Health (MoH) [Zanzibar], National  
27  
28 11 Bureau of Statistics (NBS), Office of the Chief Government Statistician (OCGS), and ICF.  
29  
30 12 2016. *Tanzania Demographic and Health Survey and Malaria Indicator Survey (TDHS-*  
31  
32 13 *MIS) 2015-16*. Dar es Salaam, Tanzania, and Rockville, Maryland, USA: MoHCDGEC,  
33  
34 14 MoH, NBS, OCGS, and ICF; 2016. <https://dhsprogram.com/pubs/pdf/FR321/FR321.pdf>  
35  
36 15 Accessed 5 March 2018.  
37  
38  
39  
40  
41 16 11 Ministry of Health and Social Welfare (MoHSW). The National Road Map Strategic Plan  
42  
43 17 to Accelerate Reduction of Maternal, Newborn and Child Deaths in Tanzania (2008-15).  
44  
45 18 2008. Available from: <http://www.who.int/pmnch/countries/tanzaniamapstrategic.pdf>  
46  
47 19 Accessed 5 March 2018.  
48  
49  
50  
51 20 12 United Nations. *The Sustainable Development Goals Report 2016*. United Nations 2016.  
52  
53 21 doi:10.18356/3405d09f-en  
54  
55  
56  
57  
58  
59  
60

- 1  
2  
3 1 13 Salam RA, Mansoor T, Mallick D, *et al.* Essential childbirth and postnatal interventions  
4  
5 for improved maternal and neonatal health. *Reprod Health* 2014;**11**:S3. doi:10.1186/1742-  
6 2  
7 4755-11-S1-S3  
8 3  
9  
10  
11 4 14 Paxton A, Maine D, Freedman L, *et al.* The evidence for emergency obstetric care.  
12  
13 Published Online First: 2005. doi:10.1016/j.ijgo.2004.11.026  
14 5  
15  
16 6 15 Pearson L, Shoo R. Availability and use of emergency obstetric services : Kenya ,  
17  
18 Rwanda , Southern Sudan , and Uganda. 2005;:208–15. doi:10.1016/j.ijgo.2004.09.027  
19 7  
20  
21 8 16 World Health Organization (WHO), UNFPA, UNICEF and Mailman School of Public  
22  
23 Health. Averting Maternal Death and Disability (AMDD). Monitoring emergency  
24 9  
25 obstetric care: a handbook. WHO. 2009. Available from:  
26 10  
27 <http://www.who.int/reproductivehealth/publications/monitoring/9789241547734/en/>  
28 11  
29 Accessed 5 March 2018.  
30  
31  
32  
33  
34 13 17 Bhandari T, Dangal G. Emergency Obstetric Care: Strategy for Reducing Maternal  
35  
36 Mortality in Developing Countries. *Nepal J Obstet Gynaecol* 2014;**9**:8–16.  
37 14  
38 doi:10.3126/njog.v9i1.11179  
39 15  
40  
41  
42 16 18 Holmer H, Oyerinde K, Meara JG, *et al.* The global met need for emergency obstetric  
43  
44 care : a systematic review. 2015;:183–90. doi:10.1111/1471-0528.13230  
45 17  
46  
47 18 19 Ueno E, Adegoke AA. Skilled Birth Attendants in Tanzania : A Descriptive Study of  
48  
49 Cadres and Emergency Obstetric Care Signal Functions Performed. Published Online  
50 19  
51 First: 2014. doi:10.1007/s10995-014-1506-z  
52 20  
53  
54  
55 21 20 Banke-thomas A, Wright K, Sonoiki O, *et al.* Assessing emergency obstetric care  
56  
57

- 1  
2  
3 1 provision in low- and middle-income countries : a systematic review of the application of  
4  
5 2 global guidelines. 2016;**1**:1–13.  
6  
7  
8 3 21 United Republic of Tanzania (URT). National Emergency Obstetric and Newborn Care  
9  
10 4 (EmONC) Assessment. RCHS, Directorate of Preventive Services, United Republic of  
11  
12 5 Tanzania, Dar es Salaam. 2015.  
13  
14  
15  
16 6 22 Ministry of Health Community Development Gender Elderly and Children  
17  
18 7 (MOHCDGEC). The National Road Map Strategic Plan to Improve Reproductive,  
19  
20 8 Maternal, Newborn, Child and Adolescent Health in Tanzania (2016 - 2020) (One Plan II).  
21  
22 9 2016. Available from:  
23  
24 10 [http://globalfinancingfacility.org/sites/gff\\_new/files/documents/Tanzania\\_One\\_Plan\\_II.pdf](http://globalfinancingfacility.org/sites/gff_new/files/documents/Tanzania_One_Plan_II.pdf)  
25  
26 11 f Accessed 5 March 2018.  
27  
28  
29  
30  
31 12 23 Mkoka DA, Kiwara A, Goicolea I, *et al*. Governing the implementation of Emergency  
32  
33 13 Obstetric Care: experiences of Rural District Health Managers, Tanzania. *BMC Health*  
34  
35 14 *Serv Res* 2014;**14**:333. doi:10.1186/1472-6963-14-333  
36  
37  
38  
39 15 24 Koblinsky M, Moyer CA, Calvert C, *et al*. Quality maternity care for every woman,  
40  
41 16 everywhere: a call to action. *Lancet* 2016;**388**:2307–20. doi:10.1016/S0140-  
42  
43 17 6736(16)31333-2  
44  
45  
46 18 25 Otolorin E, Gomez P, Currie S, *et al*. Essential basic and emergency obstetric and  
47  
48 19 newborn care: From education and training to service delivery and quality of care. *Int J*  
49  
50 20 *Gynecol Obstet* 2015;**130**:S46–53. doi:10.1016/j.ijgo.2015.03.007  
51  
52  
53  
54 21 26 Echoka E, Kombe Y, Dubourg D, *et al*. Existence and functionality of emergency  
55  
56  
57  
58  
59  
60

- 1  
2  
3 1 obstetric care services at district level in Kenya: theoretical coverage versus reality. *BMC*  
4  
5 2 *Health Serv Res* 2013;**13**:113. doi:10.1186/1472-6963-13-113  
6  
7  
8 3 27 Alam M-U, Wichaidit W, Unicomb L, *et al.* Availability and Quality of Emergency  
9  
10 4 Obstetric and Newborn Care in Bangladesh. *Am J Trop Med Hyg* 2016;**95**:298–306.  
11  
12 5 doi:10.4269/ajtmh.15-0350  
13  
14  
15  
16 6 28 Roy L, Biswas TK, Chowdhury ME. Emergency obstetric and newborn care signal  
17  
18 7 functions in public and private facilities in Bangladesh. *PLoS One* 2017;**12**:e0187238.  
19  
20 8 doi:10.1371/journal.pone.0187238  
21  
22  
23  
24 9 29 Tecla SJ, Franklin B, David A, *et al.* Assessing facility readiness to offer basic emergency  
25  
26 10 obstetrics and neonatal care ( BEmONC ) services in health care facilities of west Pokot  
27  
28 11 county , Kenya. *J Clin Simul Res* 2017;**7**:25–39.  
29  
30  
31  
32 12 30 Measure Evaluation PIMA. Health Facility Readiness to Provide Emergency Obstetric  
33  
34 13 and Newborn Care in Kenya: Results of a 2014 Assessment of 13 Kenyan Counties with  
35  
36 14 High Maternal Mortality. Nairobi, Kenya: MEASURE Evaluation PIMA, University of  
37  
38 15 North Carolina at Chapel Hill. 2016. Available from:  
39  
40 16 <https://www.measureevaluation.org/resources/publications/tr-16-123> Accessed 5 March  
41  
42 17 2018.  
43  
44  
45  
46 18 31 Health Statistics and Information Systems, World Health Organization (WHO). Service  
47  
48 19 Availability and Readiness Assessment (SARA): an annual monitoring system for service  
49  
50 20 delivery: Reference Manual, Version 2.2. 2014. Available from:  
51  
52 21 [http://www.who.int/healthinfo/systems/sara\\_reference\\_manual/en/](http://www.who.int/healthinfo/systems/sara_reference_manual/en/) Accessed 5 March  
53  
54 22 2018.  
55  
56  
57  
58  
59  
60

- 1  
2  
3 1 32 Ministry of Health and Social Welfare (MoHSW) [Tanzania Mainland], Ministry of  
4 Health (MoH) [Zanzibar], National Bureau of Statistics (NBS), Office of the Chief  
5 Government Statistician (OCGS), and ICF International 2015. Tanzania Service Provision  
6 Assessm. 2015. Available from: <https://dhsprogram.com/pubs/pdf/SPA22/SPA22.pdf>  
7 Accessed 5 March 2018.
- 8  
9  
10 6 33 Bintabara D, Nakamura K, Seino K. Determinants of facility readiness for integration of  
11 family planning with HIV testing and counseling services: evidence from the Tanzania  
12 service provision assessment survey, 2014–2015. *BMC Health Serv Res* 2017;**17**:844.  
13 doi:10.1186/s12913-017-2809-8
- 14  
15  
16 10 34 Bintabara D, Mpondo BCT. Preparedness of lower-level health facilities and the  
17 associated factors for the outpatient primary care of hypertension: Evidence from  
18 Tanzanian national survey. *PLoS One* 2018;**13**:e0192942.  
19 doi:10.1371/journal.pone.0192942
- 20  
21  
22 14 35 Schmidt AF, Finan C. Linear regression and the normality assumption. *J Clin Epidemiol*  
23 2018;**98**:146–51. doi:10.1016/j.jclinepi.2017.12.006
- 24  
25  
26 16 36 Kutner MH, Nachtsheim CJ, Neter J, *et al.* *Applied Linear Statistical Models*. 2004.
- 27  
28  
29 17 37 Gage AJ, Ilombu O, Akinyemi AI. Service readiness, health facility management practices,  
30 and delivery care utilization in five states of Nigeria: a cross-sectional analysis. *BMC*  
31 *Pregnancy Childbirth* 2016;**16**:297. doi:10.1186/s12884-016-1097-3
- 32  
33  
34 20 38 Kozuki N, Oseni L, Mtimuni A, *et al.* Health facility service availability and readiness for  
35 intrapartum and immediate postpartum care in Malawi: A cross-sectional survey. *PLoS*

- 1  
2  
3 1 *One* 2017;**12**:e0172492. doi:10.1371/journal.pone.0172492  
4  
5  
6 2 39 O'Neill K, Takane M, Sheffel A, *et al.* Monitoring service delivery for universal health  
7  
8 coverage: the Service Availability and Readiness Assessment. *Bull World Health Organ*  
9 3  
10 2013;**91**:923–31. doi:10.2471/BLT.12.116798  
11 4  
12  
13  
14 5 40 World Health Organization (WHO). Trends in Maternal Mortality: 1990 to 2013:  
15  
16 Estimates by WHO, UNICEF, UNFPA, World Bank Group and the United Nations  
17 6  
18 Population Division. WHO. 2013. doi: ISBN: 978 92 4 150722 6  
19 7  
20  
21  
22 8 41 Wang W. Influence of Service Readiness on Us of Facility Delivery Care: A Study  
23  
24 Linking Health Facility Data and Population in Haiti [WP114]. *DHS Work Pap No 114*  
25  
26 10 2014.  
27  
28  
29 11 42 Roy L, Biswas TK, Chowdhury ME. Emergency obstetric and newborn care signal  
30  
31 functions in public and private facilities in Bangladesh. *PLoS One* 2017;**12**:e0187238.  
32 12  
33 doi:10.1371/journal.pone.0187238  
34 13  
35  
36  
37 14 43 Ghulmiyyah L, Sibai B. Maternal Mortality From Preeclampsia/Eclampsia. *Semin*  
38  
39 *Perinatol* 2012;**36**:56–9. doi:10.1053/j.semperi.2011.09.011  
40 15  
41  
42  
43 16 44 Mselle LT, Moland KM, Mvungi A, *et al.* Why give birth in health facility? Users' and  
44  
45 providers' accounts of poor quality of birth care in Tanzania. *BMC Health Serv Res*  
46  
47 18 2013;**13**:174. doi:10.1186/1472-6963-13-174  
48  
49  
50 19 45 Mkoka DA, Goicolea I, Kiwara A, *et al.* Availability of drugs and medical supplies for  
51  
52 emergency obstetric care: experience of health facility managers in a rural District of  
53 20  
54 Tanzania. *BMC Pregnancy Childbirth* 2014;**14**:108. doi:10.1186/1471-2393-14-108  
55 21  
56  
57

- 1  
2  
3 1 46 Sikika. Medicines and medical supplies availability report. Using absorbent gauze  
4  
5 2 availability survey as an entry point. A case of 71 districts and 30 health facilities across  
6  
7 3 mainland Tanzania. Sikika. 2011. Available from: [http://sikika.or.tz/wp-](http://sikika.or.tz/wp-content/uploads/2013/09/medicines-and-medical-and-supply-availability-report.pdf)  
8  
9 4 content/uploads/2013/09/medicines-and-medical-and-supply-availability-report.pdf  
10  
11 5 Accessed 5 March 2018.  
12  
13  
14  
15 6 47 Busari J. Comparative analysis of quality assurance in health care delivery and higher  
16  
17 7 medical education. *Adv Med Educ Pract* 2012;:121. doi:10.2147/AMEP.S38166  
18  
19  
20  
21 8 48 de Jonge V, Nicolaas JS, van Leerdam ME, *et al*. Overview of the quality assurance  
22  
23 9 movement in health care. *Best Pract Res Clin Gastroenterol* 2011;25:337–47.  
24  
25 10 doi:10.1016/j.bpg.2011.05.001  
26  
27  
28  
29 11 49 Ministry of Health and Social Welfare (MoHSW). in-Depth Assessment of the Medicines  
30  
31 12 Supply System in Tanzania. WHO. 2008. Available from:  
32  
33 13 <http://apps.who.int/medicinedocs/documents/s16503e/s16503e.pdf> Accessed 5 March  
34  
35 14 2018.  
36  
37  
38  
39 15 50 Lewis G. Beyond the Numbers: reviewing maternal deaths and complications to make  
40  
41 16 pregnancy safer. *Br Med Bull* 2003;67:27–37. doi:10.1093/bmb/ldg009  
42  
43  
44 17 51 Kongnyuy EJ, van den Broek N. The difficulties of conducting maternal death reviews in  
45  
46 18 Malawi. *BMC Pregnancy Childbirth* 2008;8:42. doi:10.1186/1471-2393-8-42  
47  
48  
49  
50 19 52 Ministry of Health and Social Welfare (MoHSW). The National Road Map Strategic Plan  
51  
52 20 To Accelerate Reduction of Maternal, Newborn and Child Deaths in Tanzania 2008 -  
53  
54 21 2015. 2008. <http://www.who.int/pmnch/countries/tanzaniamapstrategic.pdf> Accessed 5  
55  
56  
57  
58  
59  
60

- 1  
2  
3 1 March 2018.  
4  
5  
6 2 53 Wagaarachchi PT, Graham WJ, Penney GC, *et al.* Holding up a mirror: changing obstetric  
7  
8 practice through criterion-based clinical audit in developing countries. *Int J Gynecol*  
9 3  
10 *Obstet* 2001;**74**:119–30. doi:10.1016/S0020-7292(01)00427-1  
11 4  
12  
13  
14 5 54 Sorensen BL, Elsass P, Nielsen BB, *et al.* Substandard emergency obstetric care - a  
15  
16 confidential enquiry into maternal deaths at a regional hospital in Tanzania. *Trop Med Int*  
17 6  
18 *Heal* 2010;**15**:894–900. doi:10.1111/j.1365-3156.2010.02554.x  
19 7  
20  
21  
22 8 55 Gupta KS, Rokade V. Importance of Quality in Health Care Sector. *J Health Manag*  
23  
24 9  
25 2016;**18**:84–94. doi:10.1177/0972063415625527  
26  
27  
28 10 56 Stark MA, Remyense M, Zwelling E. Importance of the Birth Environment to Support  
29  
30 11  
31 Physiologic Birth. *J Obstet Gynecol Neonatal Nurs* 2016;**45**:285–94.  
32 12  
33 doi:10.1016/j.jogn.2015.12.008  
34  
35  
36 13 57 Zwelling E, Phillips CR. Family-centered maternity care in the new millennium: is it real  
37  
38 14  
39 or is it imagined? *J Perinat Neonatal Nurs* 2001;**15**:1–12.  
40  
41  
42  
43  
44 15  
45  
46  
47  
48  
49  
50  
51  
52  
53  
54  
55  
56  
57  
58  
59  
60



1  
2  
3 **1 Figure titles/legend**  
4  
5

6 **2 Title; Figure 1 Percentage score of the three domains of readiness to provide Basic**  
7  
8  
9 **3 Emergency Obstetric and Newborn Care services**  
10

11  
12 **4 Title; Figure 2 Overall readiness score for providing Basic Emergency Obstetric and**  
13  
14 **5 Newborn Care according to the type of facility and managing authority**  
15

16  
17 **6 Legend 2 Box shows the limits of 25 and 75% percentile. Horizontal line inside the box**  
18  
19 **7 shows the median value. The bar shows the low and upper limits of 95% confidence**  
20  
21 **8 interval. The dots show outliers**  
22  
23

24 9

25  
26 10  
27

28  
29 11  
30

31 12  
32

33 13  
34

35  
36 14  
37  
38  
39  
40  
41  
42  
43  
44  
45  
46  
47  
48  
49  
50  
51  
52  
53  
54  
55  
56  
57  
58  
59  
60

1  
2  
3  
4  
5  
6  
7  
8  
9  
10  
11  
12  
13  
14  
15  
16  
17  
18  
19  
20  
21  
22  
23  
24  
25  
26  
27  
28  
29  
30  
31  
32  
33  
34  
35  
36  
37  
38  
39  
40  
41  
42  
43  
44  
45  
46  
47  
48  
49  
50  
51  
52  
53  
54  
55  
56  
57  
58  
59  
60

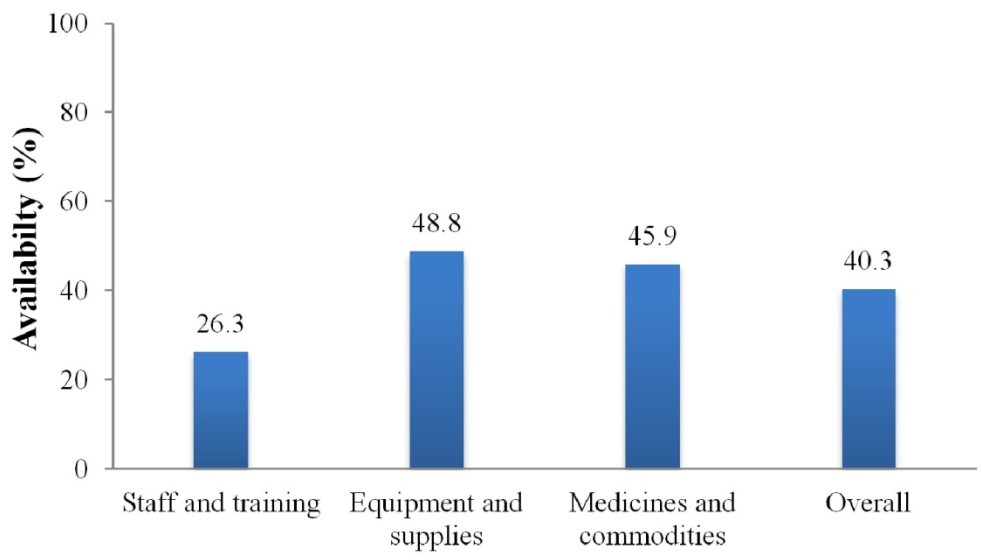

**Reported items in each domain**

127x76mm (300 x 300 DPI)

1  
2  
3  
4  
5  
6  
7  
8  
9  
10  
11  
12  
13  
14  
15  
16  
17  
18  
19  
20  
21  
22  
23  
24  
25  
26  
27  
28  
29  
30  
31  
32  
33  
34  
35  
36  
37  
38  
39  
40  
41  
42  
43  
44  
45  
46  
47  
48  
49  
50  
51  
52  
53  
54  
55  
56  
57  
58  
59  
60

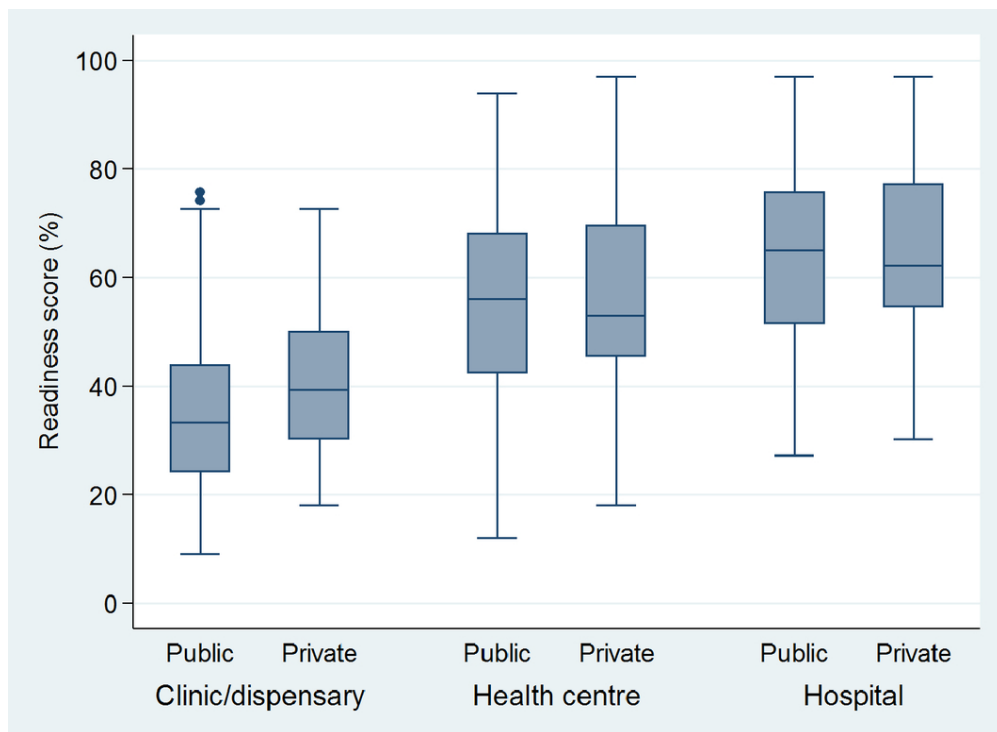

89x65mm (300 x 300 DPI)

**STROBE 2007 (v4) Statement—Checklist of items that should be included in reports of *cross-sectional studies***

| Section/Topic             | Item # | Recommendation                                                                                                                                                                       | Reported on page # |
|---------------------------|--------|--------------------------------------------------------------------------------------------------------------------------------------------------------------------------------------|--------------------|
| <b>Title and abstract</b> | 1      | (a) Indicate the study’s design with a commonly used term in the title or the abstract                                                                                               | Page 1, and 2      |
|                           |        | (b) Provide in the abstract an informative and balanced summary of what was done and what was found                                                                                  | Page 2             |
| <b>Introduction</b>       |        |                                                                                                                                                                                      |                    |
| Background/rationale      | 2      | Explain the scientific background and rationale for the investigation being reported                                                                                                 | Page 5-6           |
| Objectives                | 3      | State specific objectives, including any prespecified hypotheses                                                                                                                     | Page 6             |
| <b>Methods</b>            |        |                                                                                                                                                                                      |                    |
| Study design              | 4      | Present key elements of study design early in the paper                                                                                                                              | Page 7             |
| Setting                   | 5      | Describe the setting, locations, and relevant dates, including periods of recruitment, exposure, follow-up, and data collection                                                      | Page 7-8           |
| Participants              | 6      | (a) Give the eligibility criteria, and the sources and methods of selection of participants                                                                                          | Page 7             |
| Variables                 | 7      | Clearly define all outcomes, exposures, predictors, potential confounders, and effect modifiers. Give diagnostic criteria, if applicable                                             | Page 8-10          |
| Data sources/ measurement | 8*     | For each variable of interest, give sources of data and details of methods of assessment (measurement). Describe comparability of assessment methods if there is more than one group | Page 8-10          |
| Bias                      | 9      | Describe any efforts to address potential sources of bias                                                                                                                            | Page 11-2          |
| Study size                | 10     | Explain how the study size was arrived at                                                                                                                                            | Page 7             |
| Quantitative variables    | 11     | Explain how quantitative variables were handled in the analyses. If applicable, describe which groupings were chosen and why                                                         | Page 11            |
| Statistical methods       | 12     | (a) Describe all statistical methods, including those used to control for confounding                                                                                                | Page 11-2          |
|                           |        | (b) Describe any methods used to examine subgroups and interactions                                                                                                                  | Page 11-2          |
|                           |        | (c) Explain how missing data were addressed                                                                                                                                          | N/A                |
|                           |        | (d) If applicable, describe analytical methods taking account of sampling strategy                                                                                                   | Page 11            |
|                           |        | (e) Describe any sensitivity analyses                                                                                                                                                | N/A                |
| <b>Results</b>            |        |                                                                                                                                                                                      |                    |

|                          |     |                                                                                                                                                                                                              |                     |
|--------------------------|-----|--------------------------------------------------------------------------------------------------------------------------------------------------------------------------------------------------------------|---------------------|
| Participants             | 13* | (a) Report numbers of individuals at each stage of study—eg numbers potentially eligible, examined for eligibility, confirmed eligible, included in the study, completing follow-up, and analysed            | Page 12 and Table 1 |
|                          |     | (b) Give reasons for non-participation at each stage                                                                                                                                                         | N/A                 |
|                          |     | (c) Consider use of a flow diagram                                                                                                                                                                           | N/A                 |
| Descriptive data         | 14* | (a) Give characteristics of study participants (eg demographic, clinical, social) and information on exposures and potential confounders                                                                     | Page 12 and Table 1 |
|                          |     | (b) Indicate number of participants with missing data for each variable of interest                                                                                                                          | N/A                 |
| Outcome data             | 15* | Report numbers of outcome events or summary measures                                                                                                                                                         | Page 14-8           |
| Main results             | 16  | (a) Give unadjusted estimates and, if applicable, confounder-adjusted estimates and their precision (eg, 95% confidence interval). Make clear which confounders were adjusted for and why they were included | Page 18 and Table 4 |
|                          |     | (b) Report category boundaries when continuous variables were categorized                                                                                                                                    | Table 1             |
|                          |     | (c) If relevant, consider translating estimates of relative risk into absolute risk for a meaningful time period                                                                                             | N/A                 |
| Other analyses           | 17  | Report other analyses done—eg analyses of subgroups and interactions, and sensitivity analyses                                                                                                               | N/A                 |
| <b>Discussion</b>        |     |                                                                                                                                                                                                              |                     |
| Key results              | 18  | Summarise key results with reference to study objectives                                                                                                                                                     | Page 20-3           |
| Limitations              | 19  | Discuss limitations of the study, taking into account sources of potential bias or imprecision. Discuss both direction and magnitude of any potential bias                                                   | Page 24             |
| Interpretation           | 20  | Give a cautious overall interpretation of results considering objectives, limitations, multiplicity of analyses, results from similar studies, and other relevant evidence                                   | Page 24             |
| Generalisability         | 21  | Discuss the generalisability (external validity) of the study results                                                                                                                                        | Page 24             |
| <b>Other information</b> |     |                                                                                                                                                                                                              |                     |
| Funding                  | 22  | Give the source of funding and the role of the funders for the present study and, if applicable, for the original study on which the present article is based                                                | N/A                 |

\*Give information separately for cases and controls in case-control studies and, if applicable, for exposed and unexposed groups in cohort and cross-sectional studies.

**Note:** An Explanation and Elaboration article discusses each checklist item and gives methodological background and published examples of transparent reporting. The STROBE checklist is best used in conjunction with this article (freely available on the Web sites of PLoS Medicine at <http://www.plosmedicine.org/>, Annals of Internal Medicine at <http://www.annals.org/>, and Epidemiology at <http://www.epidem.com/>). Information on the STROBE Initiative is available at [www.strobe-statement.org](http://www.strobe-statement.org).

# BMJ Open

## Health facility service availability and readiness to provide basic emergency obstetric and newborn care in a low-resource setting: evidence from a Tanzania national survey

|                                 |                                                                                                                                                                                                  |
|---------------------------------|--------------------------------------------------------------------------------------------------------------------------------------------------------------------------------------------------|
| Journal:                        | <i>BMJ Open</i>                                                                                                                                                                                  |
| Manuscript ID                   | bmjopen-2017-020608.R3                                                                                                                                                                           |
| Article Type:                   | Research                                                                                                                                                                                         |
| Date Submitted by the Author:   | 11-Nov-2018                                                                                                                                                                                      |
| Complete List of Authors:       | Bintabara, Deogratus; The University of Dodoma, Public Health Ernest, Alex; The University of Dodoma, Obstetrics and Gynecology Mpondo, Bonaventura; The University of Dodoma, Internal Medicine |
| <b>Primary Subject Heading</b>: | Health services research                                                                                                                                                                         |
| Secondary Subject Heading:      | Health services research                                                                                                                                                                         |
| Keywords:                       | Availability and readiness, Obstetric and newborn care, Low-income countries                                                                                                                     |
|                                 |                                                                                                                                                                                                  |

SCHOLARONE™  
Manuscripts

1  
2  
3 1 **Health facility service availability and readiness to provide basic emergency obstetric and**  
4  
5 2 **newborn care in a low-resource setting: evidence from a Tanzania national survey**  
6  
7

8  
9 3 Deogratius Bintabara<sup>1\*</sup>, Alex Ernest<sup>2</sup>, Bonaventura C. Mpondo<sup>3</sup>

10  
11 4 <sup>1</sup>Department of Public Health, College of Health Sciences, The University of Dodoma,

12  
13 5 <sup>2</sup>Department of Obstetrics and Gynecology, College of Health Sciences, The University of

14  
15 6 Dodoma, <sup>3</sup>Department of Internal Medicine, College of Health Sciences, The University of

16  
17  
18 7 Dodoma

19  
20 8 **Deogratius Bintabara, M.D.** (Corresponding author)

21  
22 9 Department of Public Health, College of Health Sciences,

23  
24  
25 10 The University of Dodoma, Dodoma, Tanzania

26  
27 11 Phone: (255) 767 966 114, Email: bintabaradeo@gmail.com

28  
29  
30 12 **Alex Ernest, M.D.**

31  
32 13 Department of Obstetrics and Gynecology, College of Health Sciences,

33  
34  
35 14 The University of Dodoma, Dodoma, Tanzania

36  
37 15 Phone: (255) 767 625 828, Email: ibolinga@gmail.com

38  
39  
40 16 **Bonaventura C. Mpondo, M.D.**

41  
42 17 Department of Internal Medicine, College of Health Sciences,

43  
44  
45 18 The University of Dodoma, Dodoma, Tanzania

46  
47 19 Phone: (255) 688 530 690, Email: boniempondo@gmail.com

48  
49  
50 20 **Keywords:** Availability and readiness, Obstetric and newborn care, Low-income countries

51  
52  
53 21 **Word count:** 4500; Abstract 285

## 1 ABSTRACT

2 **Objective:** This study used a nationally-representative sample from Tanzania as an example of  
3 low-resource setting with a high burden of maternal and newborn deaths, to assess the  
4 availability and readiness of health facilities to provide Basic Emergency Obstetric and Newborn  
5 Care (BEmONC) and its associated factors.

6 **Design:** Health facility-based cross-sectional survey

7 **Setting:** We analyzed data for obstetric and newborn care services obtained from the 2014-2015  
8 Tanzania Service Provision Assessment survey, using World Health Organization-Service  
9 Availability and Readiness Assessment tool.

10 **Primary and secondary outcome measures:** Availability of seven signal functions was  
11 measured based on the provision of “parental administration of antibiotic,” “parental  
12 administration of oxytocic,” “parental administration of anticonvulsants,” “assisted vaginal  
13 delivery,” “manual removal of placenta,” “manual removal of retained products of conception,”  
14 and “neonatal resuscitation.” Readiness was a composite variable measured based on the  
15 availability of supportive items categorized into three domains; staff training, diagnostic  
16 equipment, and basic medicines.

17 **Results:** Out of 1188 facilities, 905 (76.2%) were reported to provide obstetric and newborn care  
18 services and therefore were included in the analysis of the current study. Overall availability of  
19 seven signal functions and average readiness score were consistently higher among hospitals  
20 than health centres and dispensaries ( $P<0.001$ ). Furthermore, the type of facility, performing  
21 quality assurance, regular reviewing of maternal and newborn deaths, reviewing clients' opinion,



1 and number of delivery beds per facility were significantly associated with readiness to provide  
2 BEmONC.

3 **Conclusion:** The study findings show disparities in the availability and readiness to provide  
4 BEmONC among health facilities in Tanzania. The Tanzanian Ministry of Health should  
5 emphasize quality assurance efforts and systematic maternal and newborn death audits. Health  
6 leadership should fairly distribute clinical guidelines, essential medicines, equipment, and  
7 refresher trainings to improve availability and quality BEmONC.

### 8 **Strengths and limitations of this study**

- 9 ➤ This is the first study in this region to identify factors associated with readiness to  
10 provide Basic Emergency Obstetric and Newborn Care using the recommended World  
11 Health Organization service readiness indicators, and data obtained from a nationally-  
12 representative sample.
- 13 ➤ By using a nationally-representative sample, this suggests that our findings accurately  
14 reflect the current situation regarding availability and readiness to provide Basic  
15 Emergency Obstetric and Newborn Care in low-resource setting such as Tanzania.
- 16 ➤ The findings were adjusted for clustering effect and weighted to correct for complex  
17 sampling procedure and non- response and disproportionate sampling respectively.
- 18 ➤ Being a cross-sectional study, causal relationship could not be established. Therefore, the  
19 results should be interpreted with caution.
- 20 ➤ Misclassification bias, as a result of arbitrary cut-off point set at 50%, this might  
21 misclassify readiness of health facilities to provide BEmONC.

## 1 INTRODUCTION

2 Despite a global reduction of maternal and neonatal mortality over the past two  
3 decades,<sup>1,2</sup> approximately 800 women and 7700 newborns still die every day due to  
4 complications related to pregnancy, childbirth and postpartum.<sup>3,4</sup> It is estimated that 99% of  
5 these deaths occur in low and middle-income countries (LMICs),<sup>4</sup> while 85% are contributed by  
6 low-income countries (LICs) alone.<sup>5,6</sup> Tanzania is among the LICs that continuous to experience  
7 a high burden of maternal and newborn deaths. This is despite increased coverage of antenatal  
8 care provided by skilled providers (96 to 98%), facility delivery (50 to 63%), and births assisted  
9 by skilled providers (51 to 64%) between 2010 to 2016.<sup>7-10</sup> Recent reports showed a remarkable  
10 increase of Maternal Mortality Ratio (MMR) [from 454 to 556 maternal deaths per 100,000 live  
11 births], while Neonatal Mortality Ratio (NMR) remained unchanged [26-25 deaths per 1,000  
12 live births] between 2010 to 2016.<sup>9,10</sup> These estimates remain far from operational targets set by  
13 the Tanzanian Ministry of Health through the National Road Map Strategic Plan of 2008. This  
14 plan aimed to accelerate the reduction in maternal deaths to 193 per 100000 live-births and  
15 neonatal deaths to 19 per 1000 live births in Tanzania by the end of 2015.<sup>11</sup> Given recent MMR  
16 estimates, one wonders whether Tanzania will be able to achieve targets for Sustainable  
17 Development Goal (SDG-3) to reduce maternal deaths to less than 70 in 100,000 live births and  
18 neonatal deaths to less than 12 per 1,000 live births at the end of 2030.<sup>12</sup>

19 This slow pace of MMR and NMR reduction observed in LIC including Tanzania, led the  
20 World Health Organization (WHO) to develop and recommend the availability of Basic  
21 Emergency Obstetric and Newborn Care (BEmONC) services in each health facility as a key  
22 strategy to narrow disparities in global maternal and newborn deaths.<sup>4,13-15</sup> BEmONC is an  
23 integrated strategy that aims to equip health facilities to deal with major causes of direct obstetric

1  
2  
3 1 emergencies which account for the vast majority of maternal and newborn deaths, particularly in  
4  
5 2 high mortality countries.<sup>16,17</sup> This strategy comprises a package of seven key obstetric services or  
6  
7 “signal functions” including: 1) the ability of the facility to administer parenteral antibiotics, 2)  
8  
9 3 administer uterotonic drugs (parenteral oxytocin), 3) administer parenteral anticonvulsants (e.g  
10  
11 4 magnesium sulphate), 4) perform manual removal of placenta, 5) perform removal of retained  
12  
13 5 products of conception, 6) perform assisted vaginal delivery and 7) perform basic neonatal  
14  
15 6 resuscitation. Evidence has demonstrated that provision of BEmONC by skilled personnel results  
16  
17 7 in better maternal and newborn outcomes<sup>18</sup> and Tanzania and other LICs have partially  
18  
19 8 implemented this strategy. However, the majority of health facilities lack some or all seven  
20  
21 9 signal functions of BEmONC.<sup>18–20</sup> For example in Tanzania, national BEmONC assessment  
22  
23 10 survey of 2015 revealed that 13% of dispensaries, 28% of all health centres and 62% of hospitals  
24  
25 11 were capable of performing all seven signal functions.<sup>21</sup> These estimates are below the target that  
26  
27 12 require all hospitals and at least 70% of health centres and dispensaries to provide BEmONC  
28  
29 13 services.<sup>22</sup> Furthermore, it is contrary to the effort made by Tanzanian government on improving  
30  
31 14 maternal and newborn health such as developing number of policies and guidelines, as a  
32  
33 15 response from international and regional policies and agreements (Delhi Declaration of 2005),  
34  
35 16 that targets to reduce MMR and NMR.<sup>11,22,23</sup>  
36  
37  
38  
39  
40  
41  
42

43 18 Countries with low availability of BEmONC services also experienced a high burden of  
44  
45 19 maternal and newborn deaths.<sup>1,24</sup> This correlation has been documented by previous studies and  
46  
47 20 many researchers have identified critical gaps on BEmONC that if addressed could reduce the  
48  
49 21 burden of high MMR and NMR in those countries.<sup>18,25</sup> However, the majority of previous studies  
50  
51 22 have concentrated on the assessment of services availability and few have assessed the readiness  
52  
53 23 of the facilities to provide BEmONC services.<sup>26–30</sup> In addition, these studies found low readiness  
54  
55  
56  
57  
58  
59  
60

1 of the facilities to provide BEmONC. Hence, there is little information regarding factors  
2 associated with low readiness of facilities to provide BEmONC in Tanzania. Better  
3 understanding of the factors associated with facility readiness to provide BEmONC is crucial to  
4 support maternal and newborn health system improvements.

5 To that end, this study used a nationally-representative sample from Tanzania to assess  
6 the current extent of availability and readiness of health facilities to provide BEmONC services.  
7 Associated factors were also examined according to the type of facility and managing authority  
8 by using WHO Service Availability and Readiness Assessment (SARA) manual <sup>31</sup> with  
9 modification to some questions to fit the study setting.<sup>31</sup> The findings from this study will  
10 provide a crucial guidance on important factors that need to be addressed to strengthen the  
11 BEmONC services for policy-makers, administrators, and researchers in Tanzania and other  
12 LICs.

## 1       2 3       1    **METHODS**

### 4 5 6       2    **Data source**

7  
8           3           The analyzed data of the current study was drawn from 2014-2015 Tanzania Service  
9           4           Provision Assessment (TSPA) survey dataset. The 2014-2015 TSPA was undertaken by  
10          5           Tanzania's National Bureau of Statistics (NBS) in collaboration with the Office of the Chief  
11          6           Government Statistician (OCGS), Zanzibar, the Ministry of Health and Social Welfare  
12          7           (MoHSW), Tanzania Mainland, and the Ministry of Health (MOH), Zanzibar. Technical support  
13          8           for the survey was provided by ICF International under the Demographic and Health Survey  
14          9           (DHS) program. The survey assessed the facilities regarding availability and readiness of  
15          10          providing basic and essential health services, including the presence and function of components  
16          11          essential for the delivery of quality service for all aspects including maternal, newborn and child  
17          12          health care, family planning, and reproductive health services.

### 18 19 20       13   **Sample and Sampling procedure**

21           14          The sampling procedure used in TSPA survey is reported elsewhere.<sup>32</sup> A random  
22           15          stratified sampling of health facilities according to facility type, managing authority, and regions  
23           16          was used to select a nationally-representative sample of 1200 facilities from the national master  
24           17          facility list contains 7102 health facilities. The selection of desirable health facilities was  
25           18          achieved after excluding seven facilities that refused to participate, four had closed on the  
26           19          interview days, and one that could not be reached because of poor infrastructure. Then, a total of  
27           20          1188 health facilities were assessed in 2014-2015 TSPA survey. However, after excluding 283  
28           21          facilities that did not meet inclusion criteria (not providing any services related to maternal and  
29           22          newborn health), a total of 905 health facilities were included in the current analysis.

## 1 **Data collection methods**

2 The 2014-2015 TSPA used four main types of questionnaires during data collection. The  
3 current analysis used data collected by the *Facility Inventory Questionnaire* and one variable  
4 regarding staff training from *Health Provider Questionnaire*. After pre-testing of the  
5 questionnaires, the finalized and corrected versions were used in the main 2014-2015 TSPA  
6 survey data collection between October 20, 2014 – February 21, 2015. Additionally, visits of  
7 some facilities that were not covered previously were conducted from March 2-13, 2015. The  
8 data collection was performed by 67 nurses who were trained for four weeks and were qualified  
9 by a series of practical tests and examinations to be interviewers. Following the training, 20  
10 teams were formed (2 for Zanzibar and 18 for Tanzania Mainland). Each team consisted of a  
11 team leader, 3 interviewers and a driver. On average, the data collection process lasted one day at  
12 a small facility (dispensary clinics and some health centres) and two or three days for large  
13 facilities (mostly hospitals). All collected data regarding the health facility service availability  
14 and readiness were provided by the manager, the person-in-charge of the facility, or the most  
15 senior health worker responsible for the client services present at the facility. The interviewers  
16 observed and verified the presence of valid or functioning reported services or supplies.

## 17 **Measurement of variables**

18 Based on our research questions; the current study identified two outcome variables  
19 which were “BEmONC services availability” and “BEmONC services readiness”. These  
20 variables were measured by using the WHO methods of assessing facility service availability and  
21 readiness. Hence, “BEmONC services availability” in this study is defined as “physical presence  
22 of the services related with provision of BEmONC”. This was measured based on whether the  
23 following seven signal functions have ever been carried out by providers as part of their work

1 within facility at least once during the past 3 months: “parental administration of antibiotic,”  
2 “parental administration of oxytocic,” “parental administration of anticonvulsants,” “assisted  
3 vaginal delivery,” “manual removal of placenta,” “manual removal of retained products of  
4 conception,” and ‘neonatal resuscitation.’”

5 “BEmONC services readiness” in this study is defined as the willingness or preparedness  
6 of the facility to provided BEmONC. This was measured based on the availability and  
7 functioning of supportive items categorized into three domains (groups) as follows; the first  
8 domain was staff training which had two indicators - the presence of guidelines and at least one  
9 staff who has received any formal or structured in-service training (refresher training) related to  
10 the services offered in the last 24 months preceding the assessment. The second domain was  
11 diagnostic equipment which had eleven indicators i.e presence of “emergency transport,”  
12 “sterilization equipment,” “examination light,” “delivery pack,” “suction apparatus,” “manual  
13 vacuum extractor,” “vacuum aspirator or D&C kit,” “neonatal bag and mask,” “delivery bed,”  
14 “Partograph,” and “gloves.” The third domain was basic medicine and commodities which had  
15 eleven indicators contains essential medicines for delivery and newborn i.e “injectable  
16 antibiotic,” “injectable uterotonic,” “injectable magnesium sulfate,” “injectable diazepam,”  
17 “intravenous fluids,” “skin disinfectant,” “antibiotic eye ointment,” “4% chlorhexidine,”  
18 “injectable gentamicin,” “injectable ceftriaxone,” and “amoxicillin suspension.” The BEmOC  
19 service readiness was then created as a composite score by adding the presence of each indicator,  
20 with equal weight given to each of the domains and each of the indicators within the domains. As  
21 the expected target was 100%, each domain accounted for 33.3% (100%/3) of the total score.  
22 The proportion of each indicator within the domain was equal to 33.3% divided by the number of  
23 indicators in that domain. The BEmONC service readiness score for each facility was then

1  
2  
3 1 calculated by adding the proportions. Given that the readiness score is a relative measurement,  
4  
5 2 then facilities that scored 50% or more were considered to be ready to provide BEmONC  
6  
7 3 services than those scored less than 50% in BEmONC readiness score. This cut-off point of 50%  
8  
9 4 was also used in previous studies.<sup>33,34</sup>  
10  
11  
12

13 5 The outcome variables were examined against selected potential explanatory variables  
14  
15 6 that we proposed as key variables that may potentially influence the availability or readiness of  
16  
17 7 the health facility to provide BEmONC services. These variables were: facility location was  
18  
19 8 coded as "0" for urban and "1" for Rural. The facility type was coded as "0" for clinic or  
20  
21 9 dispensary, "1" for a health centre, and "2" for a Hospital. Managing authority was coded as "0"  
22  
23 10 for a public facility and "1" for the private facility. Duty schedule for 24 hours was coded as  
24  
25 11 "Yes" for the facility that had a duty schedule or call list for 24 hours staff assignment,  
26  
27 12 otherwise, the facility was coded as "No." Quality assurance was coded as "performed" for  
28  
29 13 facility reported to perform quality assurance at least once per year, otherwise the facility was  
30  
31 14 coded as "not performed." Maternal or newborn deaths were coded as "reviewed" for the facility  
32  
33 15 that conducted regular reviews of maternal or newborn deaths or near-misses, otherwise, the  
34  
35 16 facility was coded as "not reviewed." Clients' opinions was coded as "reviewed" for facility  
36  
37 17 reported having a system of determining and reviewing clients' opinion, otherwise, the facility  
38  
39 18 was coded as "not reviewed." A number of staff and number of beds per facility remained as  
40  
41 19 discrete quantitative variables.  
42  
43  
44  
45  
46  
47  
48

## 49 **Statistical analysis**

50  
51 21 Data were analyzed using Stata 14 (StataCorp, College Texas). For all the analyses, the  
52  
53 22 "svy" set command in Stata was used to adjust for the complex sampling design employed by  
54  
55 23 TSPA survey. Moreover, as the facilities sampled were not evenly distributed and the response  
56  
57  
58  
59  
60



1  
2  
3 1 rate might be very different by regions or facility type, then over and under-sampled in the  
4  
5 2 regions with fewer and more facilities respectively were performed before data collection.  
6  
7  
8 3 Therefore, before analysis, facility weight was used to restore the actual representativeness of the  
9  
10 4 facilities sampled.

11  
12  
13 5 In the descriptive analysis, continuous variables were summarized using either mean  
14  
15 6 (SD) for normally distributed variables or median (IQR) for non-normal distributed variables.  
16  
17  
18 7 All categorical variables were summarized using proportions and then presented in tables and  
19  
20 8 graphs. Bivariate and multivariable regression models were fitted to assess the existence of the  
21  
22 9 association between the outcome variable (BEmONC service readiness) and the explanatory  
23  
24 10 variables. As the aim was to fit a final model that predicts the association, the objective criterion-  
25  
26 11 based method was used to include or exclude variable in the multiple regression models. A *t*-test  
27  
28 12 for each of the coefficient in multiple regression model was calculated and used to test for the  
29  
30 13 association. A *P*-value of less than 0.05 was considered indicative of statistically significant  
31  
32 14 association.

### 33 34 35 36 37 15 **Ethics statement**

38  
39 16 This study was based on an analysis of existing public domain survey data sets that are  
40  
41 17 freely available online with all identifier information detached. The survey was approved by the  
42  
43 18 Ethics Committee of the ICF Macro at Calverton in the USA and by the National Institute of  
44  
45 19 Medical Research Ethics Committee in Tanzania. Informed consent was requested and obtained  
46  
47 20 from participants before the interview.  
48  
49  
50

### 51 52 21 **Patient and Public Involvement Statement**

53  
54 22 Patient and public were not involved in the analysis of this study.  
55  
56  
57

## 1 RESULTS

### 2 General characteristics of surveyed facilities

3 Table 1 presents a summary of the general characteristics of the included health facilities.

4 Out of 1188 facilities involved in the TSPA survey, 905 (76.18%) reported to provide delivery  
5 and newborns care services and therefore were included in the analysis of the current study.

6 More than 80% of the facilities were located in rural area and publicly owned. Less than 30% of  
7 the facilities regularly reviewed maternal and newborn deaths or "near-misses" cases that  
8 occurred within the facility. Overall, the number of staff per facility was low with a median  
9 (IQR) of 3 (2 - 6).

1 **Table 1 Percent distribution of surveyed facilities according to background characteristics,**  
 2 **TSPA 2014-2015 (N=905).**

| Variable                                    | n (%)       |
|---------------------------------------------|-------------|
| <b>Facility location</b>                    |             |
| Rural                                       | 773 (85.41) |
| Urban                                       | 132 (14.59) |
| <b>Facility type</b>                        |             |
| Clinic & dispensary                         | 751 (82.98) |
| Health center                               | 110 (12.16) |
| Hospital                                    | 44 (4.86)   |
| <b>Managing authority</b>                   |             |
| Public                                      | 756 (83.54) |
| Private                                     | 149 (16.46) |
| <b>Duty schedule for 24 hours</b>           |             |
| Yes                                         | 256 (28.29) |
| No                                          | 649 (71.71) |
| <b>Quality assurance</b>                    |             |
| Performed                                   | 149 (16.46) |
| Not performed                               | 756 (83.54) |
| <b>Maternal/newborn deaths</b>              |             |
| Reviewed                                    | 182 (20.11) |
| Not reviewed                                | 723 (79.89) |
| <b>Clients' opinions</b>                    |             |
| Reviewed                                    | 272 (30.06) |
| Not reviewed                                | 633 (69.94) |
| <b>Number of staffs per facility</b>        |             |
| Median (IQR)                                | 3 (2,6)     |
| <b>Number of delivery beds per facility</b> |             |
| Mean (SD)                                   | 1.41 (1.02) |

3 **IQR: Interquartile range; SD: Standard deviation**

## 1 **Seven signal functions for BEmONC by type of facility and managing authority**

2 Table 2, shows the distribution of the availability of seven signal function for BEmONC  
3 by type of facility and managing authority. Overall availability of these seven signal functions  
4 (parental administration of the antibiotic, parental administration of oxytocic, parental  
5 administration of anticonvulsant, assisted vaginal delivery, manual removal of placenta, manual  
6 removal of retained products of conception, and neonatal resuscitation) were consistently higher  
7 among hospitals than health centers and dispensaries ( $P<0.001$ ). Despite the fact that private  
8 facilities consistently reported the higher availability of these seven signal functions compared to  
9 public facilities, only parental administration of the antibiotic, parental administration of  
10 anticonvulsants, and neonatal resuscitation were significantly higher in private facilities  
11 ( $P<0.001$ ). Regardless of facility type and managing authority, majority of the facilities reported  
12 high availability of parental administration of oxytocic (83.61%), assisted vaginal delivery  
13 (69.60%), and neonatal resuscitations (52.14%) while less than half of all facilities reported  
14 availability of manual removal of retained products of conception (35.36%), parental  
15 administration of antibiotic (34.01%), manual removal of placenta (33.95%), and parental  
16 administration of anticonvulsants (13.35%).

1 **Table 2 Percentage distribution of seven signal functions for Basic Emergency Obstetric and Newborn Care services by type of**  
 2 **facility and managing authority, TSPA 2014-2015 (N=905).**

| Variable                                                   | Facility type                  |                        |                   | Managing authority |                  | Total<br>n (%) |
|------------------------------------------------------------|--------------------------------|------------------------|-------------------|--------------------|------------------|----------------|
|                                                            | Dispensary/<br>Clinic<br>n (%) | Health centre<br>n (%) | Hospital<br>n (%) | Public<br>n (%)    | Private<br>n (%) |                |
| Parental administration of antibiotic                      | 205 (27.32)                    | 66 (60.01)             | 37 (83.95)*       | 242 (32.04)        | 66 (44.03)*      | 308 (34.01)    |
| Parental administration of oxytocin                        | 614 (81.77)                    | 100 (90.94)            | 42 (96.86)*       | 633 (83.69)        | 123 (83.16)      | 756 (83.61)    |
| Parental administration of<br>anticonvulsants              | 52 (6.96)                      | 35 (31.59)             | 34 (77.56)*       | 83 (10.93)         | 38 (25.63)*      | 121 (13.35)    |
| Assisted vaginal delivery                                  | 511 (68.00)                    | 80 (72.85)             | 39 (88.94)*       | 525 (69.50)        | 104 (70.11)      | 629 (69.60)    |
| Manual removal of placenta                                 | 227 (30.22)                    | 50 (45.34)             | 30 (69.66)*       | 248 (32.87)        | 59 (39.46)       | 307 (33.95)    |
| Manual removal of retained products<br>of conception       | 234 (31.10)                    | 56 (51.35)             | 30 (68.56)*       | 264 (34.88)        | 56 (37.79)       | 320 (35.36)    |
| Neonatal resuscitation                                     | 352 (46.78)                    | 80 (73.05)             | 40 (92.03)*       | 383 (50.64)        | 89 (59.76)*      | 472 (52.14)    |
| Number of facilities providing<br>normal delivery services | 751                            | 110                    | 44                | 756                | 149              | 905            |

3 **Note : The availability of seven functions were based on whether the intervention has been carried out at least once during**  
 4 **the past 3 months.**

5 **: \* =  $P < 0.05$  according to type of facility.**

## 1 **Availability of important supportive items for delivery and newborns care services**

2 **Human resources (staff training):** Only (206, 22.75%) facilities reported having at least  
3 one staff who had received refresher training in delivery and newborn care. Also about one-third  
4 (270, 29.80%) of facilities reported having recommended guidelines related to delivery and  
5 newborn care.

6 **Essential equipment and supplies:** Overall, the majority (890, 98.35%) of facilities  
7 reported dedicating at least one bed for delivery purposes, (780, 86.24%) had sterile gloves, (760,  
8 84.05%) had delivery packs, and (692, 76.48%) had a neonatal bags and masks for resuscitation.  
9 However, less than a quarter of facilities reported having suction apparatus (23.14%),  
10 sterilization equipment (20.75%), examination light (14.37%), vacuum aspirator or dilatation and  
11 curettage D&C kit (7.51%), or manual vacuum extractor (5.31%).

12 **Medicines and commodities:** Regarding availability of essential medicines for delivery,  
13 injectable uterotonic (78.81%), skin disinfectant (61.10%), and injectable diazepam (55.23%)  
14 were often available, while intravenous fluids (48.15%), injectable magnesium sulfate (40.77%),  
15 injectable antibiotic (32.11%) were not widely available. On the other hand, regarding essential  
16 medicines for newborn care, more than half of facilities reported availability of amoxicillin  
17 suspension (62.90%) and injectable ceftriaxone (56.69%) while less than one-third of facilities  
18 reported availability of injectable gentamicin (29.54%), antibiotic eye ointment (28.05%), and  
19 4% chlorhexidine (11.95%) (Table 3).

1 **Table 3 Indicators of readiness to providing Basic Emergency Obstetric and Newborn Care**  
 2 **services, TSPA 2014-2015 (N=905).**

| Indicators                       | n (%) of facilities in which indicator is available |
|----------------------------------|-----------------------------------------------------|
| <b>Staff and training</b>        |                                                     |
| Presence of guidelines           | 270 (29.80)                                         |
| Availability of trained staff    | 206 (22.75)                                         |
| <b>Equipment and supplies</b>    |                                                     |
| Emergency transport              | 567 (62.54)                                         |
| Sterilization equipment          | 188 (20.75)                                         |
| Examination light                | 130 (14.37)                                         |
| Delivery pack                    | 760 (84.05)                                         |
| Suction apparatus                | 209 (23.14)                                         |
| Manual vacuum extractor          | 48 (5.31)                                           |
| Vacuum aspirator or D&C kit      | 68 (7.51)                                           |
| Neonatal bag and mask            | 692 (76.48)                                         |
| Delivery bed                     | 890 (98.35)                                         |
| Partograph                       | 520 (57.51)                                         |
| Gloves                           | 780 (86.24)                                         |
| <b>Medicines and commodities</b> |                                                     |
| Essential medicines for delivery |                                                     |
| Injectable antibiotic            | 291 (32.11)                                         |
| Injectable uterotonic            | 713 (78.81)                                         |
| Injectable magnesium sulfate     | 368 (40.77)                                         |
| Injectable diazepam              | 500 (55.23)                                         |
| Intravenous fluids               | 436 (48.15)                                         |
| Skin disinfectant                | 553 (61.10)                                         |
| Essential medicines for newborns |                                                     |
| Antibiotic eye ointment          | 254 (28.05)                                         |
| 4% chlorhexidine                 | 108 (11.95)                                         |
| Injectable gentamicin            | 267 (29.54)                                         |
| Injectable ceftriaxone           | 513 (56.69)                                         |
| Amoxicillin suspension           | 569 (62.90)                                         |

3

4

## 1 **Facility readiness to provide BEmONC services**

2 Figure 1 shows the readiness score corresponding to the three domains and the overall  
3 index of facility readiness to provide BEmONC. Each of the three domains had an average  
4 readiness score of less than 50% based on the indicators suggested by WHO-SARA manual, that  
5 yield overall mean readiness score (SD) of 40.3 (17.6)%. However, 267 (29.50%) of all health  
6 facilities had overall percentage readiness score of 50% or more, therefore, were considered  
7 ready to provide BEmONC services.

## 8 **Overall BEmONC readiness score according to the type of facility and managing authority**

9 The overall readiness score was found to differ significantly according to the type of  
10 facility, with a higher score among hospitals compared to dispensaries ( $P<0.001$ ). However,  
11 there was no difference in the overall readiness score according to the managing authority at  
12 each level of facility type ( $P>0.05$ ) (Figure 2).

## 13 **Factors associated with facility readiness to provide BEmONC services**

14 Table 4 presents the results of the bivariate and multivariate analysis. In bivariate analysis,  
15 all explanatory variables showed association with outcome variable “BEmONC service readiness”  
16 at  $P<0.05$ , therefore, were selected and included in multiple regression models by using objective  
17 criterion-based methods to predict their association with readiness to provide BEmONC services.  
18 The results of multiple regression analysis showed that the readiness of facility to provide  
19 BEmONC services was higher at health centres (11.54 percentage points better than dispensary  
20 and clinics), at facilities which performed quality assurance (5.45 percentage points better than  
21 those not performed), at facilities reported regular reviewing maternal, newborn deaths or “near-  
22 misses” (6.49 percentage points better than those not reviewed), at facilities that reviewed clients  
23 opinion about health facility or its services (4.29 percentage points better than those not reviewed



1 clients opinions), and facility with more delivery beds (2.44 percentage points for each doubling  
 2 of beds per facility).

3 **Table 4 Results of unadjusted and adjusted multiple regression models of factors**  
 4 **associated with readiness to provide Basic Emergency Obstetric and Newborn Care**  
 5 **services, TSPA 2014-2015 (N=905).**

| Variable                                                                | Unadjusted |           | Adjusted          |           |
|-------------------------------------------------------------------------|------------|-----------|-------------------|-----------|
|                                                                         | Coef       | Std error | Coef <sup>A</sup> | Std error |
| <b>Facility location</b> (ref: Rural)                                   |            |           |                   |           |
| Urban                                                                   | 8.64**     | 2.29      | 0.20              | 2.08      |
| <b>Facility type</b> (ref: clinic/dispensary)                           |            |           |                   |           |
| Health center                                                           | 18.15**    | 1.24      | <b>11.54**</b>    | 2.02      |
| Hospital                                                                | 26.09**    | 2.54      | 8.06              | 4.15      |
| <b>Managing authority</b> (ref: Public)                                 |            |           |                   |           |
| Private                                                                 | 8.46**     | 1.90      | 3.56              | 1.87      |
| <b>Duty schedule for 24 hours</b> (ref: No)                             |            |           |                   |           |
| Yes                                                                     | 12.28**    | 1.62      | 0.52              | 2.13      |
| <b>Quality assurance</b> (ref: Not performed)                           |            |           |                   |           |
| Performed                                                               | 14.24**    | 2.36      | <b>5.45*</b>      | 2.44      |
| <b>Maternal/newborn deaths</b> (ref: Not reviewed)                      |            |           |                   |           |
| Reviewed                                                                | 14.76**    | 1.76      | <b>6.49**</b>     | 1.89      |
| <b>Clients' opinions reviewed</b> (ref: No)                             |            |           |                   |           |
| Yes                                                                     | 9.90**     | 1.74      | <b>4.29*</b>      | 1.68      |
| <b>Number of staffs per facility</b><br>(as continuous variable)        | 0.09**     | 0.04      | -0.001            | 0.013     |
| <b>Number of delivery beds per facility</b><br>(as continuous variable) | 6.28**     | 0.58      | <b>2.44*</b>      | 0.83      |

6 \*  $P < 0.05$ ; \*\*  $P < 0.001$ .

7 **Coef: Coefficient; Std: Standard error.**

8 <sup>A</sup>**Adjusted coefficient: Each variable in the model has been adjusted by all variables.**

## 1 DISCUSSION

2 This study used a nationally-representative data from Tanzania as an example of low-  
3 resource country to assess the availability and readiness of health facilities to provide BEmONC  
4 services among health facilities. The study findings indicate a relatively poor readiness of  
5 Tanzanian health facilities to provide BEmONC services. The observed scarcity of human  
6 resource (trained providers), essential diagnostic equipment, and basic medicine resulted into  
7 poor readiness of the facilities to provide BEmONC. The observed poor facility readiness to  
8 provide BEmONC in this study, extend the findings from other studies across different regions  
9 of LICs.<sup>35,36</sup> These findings continue to highlight essential gaps in delivery maternal and  
10 newborn services that are obstacles to universal access to health services.<sup>37</sup> Therefore, the  
11 findings have greater implications for the improvement of emergency obstetric care in Tanzania  
12 and other LICs.

13 Availability of seven signal functions for BEmONC is crucial to reduce maternal and  
14 neonatal mortality.<sup>38</sup> The current study found disparities in the availability of these seven signal  
15 functions according to the type of facility and managing authority. Despite the fact that private  
16 facilities consistently reported higher availability of the seven signal functions compared to  
17 public facilities, only three signal functions; parental administration of the antibiotic, parental  
18 administration of anticonvulsants, and neonatal resuscitation were significantly more reported in  
19 privately owned than publicly owned facilities. Similarly, hospitals were found to report  
20 significantly greater availability of the signal functions than lower-level facilities (health centres  
21 and dispensaries). These findings are in agreement with a study conducted in Haiti in 2014.<sup>39</sup>  
22 The similarity of the findings of these studies might be due to the similar methodology used;  
23 both studies used data from the national representative sample collected by DHS program.

1  
2  
3 1 Therefore, the questionnaire used for the interviews were nearly similar. Also, Tanzania and  
4  
5 2 Haiti share socio-economic determinants as these two countries are both LICs.  
6  
7

8  
9 3 Furthermore, our results indicate that availability of parental administration of  
10  
11 4 anticonvulsants (magnesium sulfate) is still a challenge and as a result, it compromises the  
12  
13 5 provision of BEmONC in Tanzania particularly in public and lower-level health facilities. A  
14  
15 6 similar finding has been reported in another low-resource setting.<sup>40</sup> Inadequate availability of this  
16  
17 7 important component of BEmONC, might led to unnecessary delays to prevent or intervene pre-  
18  
19 8 eclampsia/eclampsia that is one of the three leading causes of maternal morbidity and  
20  
21 9 mortality.<sup>41</sup> Together with other suboptimal availability of parental administration of antibiotic,  
22  
23 10 manual removal of placenta and retained products of conception suggesting that, despite the  
24  
25 11 increased coverage of antenatal care, facility deliveries, and postnatal care, these efforts alone  
26  
27 12 can not reduce MMR and NMR without improving the availability of BEmONC services.<sup>42,43</sup>  
28  
29 13 The low availability of seven signal functions in the public and lower-level facilities in Tanzania  
30  
31 14 is further impacted by the current long process of ordering and delivering of drugs and medical  
32  
33 15 supplies through a system called Integrated Logistic System (ILS). With this system, facility  
34  
35 16 places its order through District Medical Officer's (DMO) office to the Medical Department  
36  
37 17 Store (MSD), a body that operates under Ministry of Health responsible for managing all the  
38  
39 18 procurement and supply of medical items concerning public facilities.<sup>44</sup> Hence, any faults or  
40  
41 19 delays in the ordering system may result in the low availability of items or services in the  
42  
43 20 facilities. These delays will compromise efforts towards achieving targets set by the Tanzanian  
44  
45 21 government that all hospitals and at least 70% of health centres and dispensaries be able to  
46  
47 22 provide BEmONC services at the end of 2020.<sup>22</sup>  
48  
49  
50  
51  
52  
53  
54  
55  
56  
57  
58  
59  
60

1  
2  
3 1 Facility readiness is an important aspect that demonstrates a facility's commitment to  
4  
5 2 ensuring cumulative availability of components required to provide a specific service.<sup>31</sup> Our  
6  
7 3 analysis identified the significant difference of BEmONC readiness according to the type of  
8  
9 4 facility, in which higher-level facilities (hospitals) were found to have high readiness score  
10  
11 5 compared to lower-level facilities (dispensaries/clinics). The suboptimal readiness observed in  
12  
13 6 the lower-level facilities might be due to unclear formula on how to allocate funds in these  
14  
15 7 facilities that may contribute to insufficiencies and inequities in the distribution of medical  
16  
17 8 supplies.<sup>44</sup> The strengthening of the lower-level facilities which are usually located in the rural  
18  
19 9 areas and serve about 75% of Tanzanian population is highly needed to address the increasing  
20  
21 10 burden of maternal and neonatal deaths. The finding is in agreement with the previous study  
22  
23 11 conducted in Kenya.<sup>30</sup>

24  
25  
26  
27  
28  
29 12 Quality assurance is a process that aims to promote a high standard of the service  
30  
31 13 provision within healthcare systems.<sup>45</sup> The results of this study show that facilities that  
32  
33 14 performed quality assurance were more likely to be ready to provide BEmONC services  
34  
35 15 compared to facilities not engaged in quality assurance activities. This might be due to the fact  
36  
37 16 that, quality assurance involves continuous monitoring and persistent feedback to improve  
38  
39 17 services offered.<sup>46</sup> Therefore, based on recommendations from quality assurance teams, these  
40  
41 18 facilities are more likely to improve the availability of services that may result in their high  
42  
43 19 readiness score. However, the uptake of quality improvement and quality assurance activities  
44  
45 20 remains low within the Tanzanian health system as a small number of health facilities regular  
46  
47 21 perform such activities.<sup>47</sup>

48  
49  
50  
51  
52  
53 22 Each maternal or newborn death has a story to tell,<sup>48</sup> therefore, review of these deaths is  
54  
55 23 widely recognized as a recommended tool to improve obstetric and neonatal care.<sup>49</sup> Our results

1  
2  
3 1 show that facilities which perform maternal and newborn death reviews were more likely to be  
4  
5 2 ready to provide BEmONC services compared to facilities that did not perform these reviews. It  
6  
7 3 may be that facilities that perform death reviews use that information to improve BEmONC  
8  
9 4 service availability and readiness. Despite the maternal death reviews have been imposed over  
10  
11 5 the past two decades as the national policy to improve the quality of BEmONC services the  
12  
13 6 results show that majority of Tanzania health facilities do not regularly perform such kind of  
14  
15 7 reviews.<sup>50</sup> Therefore, the number of facilities miss the opportunity of reflection and direct  
16  
17 8 feedback to improve the BEmONC services.<sup>51,52</sup>  
18  
19  
20  
21

22 9 Also, clients' opinions are beneficial parameter for judging the availability and readiness  
23  
24 10 of the facility to provide specific services. The results of this study indicate that facilities which  
25  
26 11 review clients' opinion were more likely to be ready to provide BEmONC services. This might  
27  
28 12 be explained by the fact that clients' opinions not only reflects the satisfaction with service  
29  
30 13 received but also provide positive and negative feedback towards services provided by facility or  
31  
32 14 health providers.<sup>53</sup> This feedback may be used to correct the shortcomings highlighted by  
33  
34 15 patients, hence improve the availability of services that are important aspect to assess the  
35  
36 16 readiness of the facility to provide services. However, we also found low number of health  
37  
38 17 facilities that regularly collect and review clients' opinion regarding the provision of maternal  
39  
40 18 and newborn services.  
41  
42  
43  
44  
45

46 19 Despite on-the-job training creates an opportunity of healthcare providers to receive the  
47  
48 20 up-to-date information and skills required to provide better healthcare.<sup>33</sup> The results of this study  
49  
50 21 indicated a low proportion of health facilities with at least one staff member trained in providing  
51  
52 22 delivery and newborn care services. This severe lack of trained staff together with shortage of  
53  
54 23 health workers in health facilities reported in previous studies, may compromise the readiness of  
55  
56  
57  
58  
59  
60

1 the facilities to provide BEmONC in Tanzania.<sup>54,55</sup> Although, the Tanzanian government made  
2 several efforts to deal with shortage of human resources and other challenges in the health system,  
3 yet its health budgets over decades remained consistently below Abuja target of 15%.<sup>55,56</sup> This  
4 might explain the observed low readiness of the facilities to provide BEmONC and that the  
5 MMR remains high if inadequate budgets are allocated to improve maternal and child health  
6 services.

7 The strength of the current study is that it analyzed a nationally-representative sample of  
8 health facilities in Tanzania, providing key insight into the BEmONC availability and readiness  
9 in the LICs with higher MMR and NMR. It provides important information about the current  
10 situation regarding availability and readiness of facilities to provide BEmONC in a resource-  
11 constrained environment. Since TSPA survey employed complex sampling procedures, the  
12 estimates were adjusted for clustering effect and weighted to correct for non-response and  
13 disproportionate sampling. However, this study had some limitations, being a cross-sectional  
14 study, causal relationship could not be established. Therefore, the results should be interpreted  
15 with caution. Also, the study is subjected to misclassification bias due to the use of arbitrary cut-  
16 off point set at 50%; this might be misclassified readiness of health facilities to provide  
17 BEmONC services. Though, the effect of this bias has been minimized by inclusion of many  
18 indicators as suggested by WHO to assess the level of facility readiness.

19 In summary, the results of this study indicate disparities in the availability of seven signal  
20 functions and readiness to provide BEmONC services among health facilities in Tanzania. It also  
21 highlighted the gaps in the availability of important supportive items such as refresher training  
22 and clinical guidelines for the provision of BEmONC. To improve the quality of BEmONC  
23 services, there are key steps that government authorities might consider. These include:- the

1  
2  
3 1 emphasis on quality assurance and quality improvement activities and implementation of regular  
4  
5 2 maternal and newborn death audits. In order to improve BEmONC services, the health system  
6  
7 3 leaders should implement strategies to better ensure fair distribution of clinical guidelines,  
8  
9 4 essential medicines, equipment, and refresher training. Additional studies may be useful to  
10  
11 5 ensure effective implementation of government policies to support the readiness of health  
12  
13 6 facilities to provide BEmONC services.  
14  
15  
16  
17  
18 7  
19  
20  
21  
22  
23  
24  
25  
26  
27  
28  
29  
30  
31  
32  
33  
34  
35  
36  
37  
38  
39  
40  
41  
42  
43  
44  
45  
46  
47  
48  
49  
50  
51  
52  
53  
54  
55  
56  
57  
58  
59  
60

## 1 **Authors' contributions**

2 DB conceptualized and designed the study, performed statistical analysis and wrote the first and  
3 revised draft of the manuscript. AE involved in the interpretation of data, revised and edited the  
4 manuscript. BCM provided advice on statistical analysis, interpretation of data, and edited the  
5 manuscript; All authors read and approved the final manuscript.

## 6 **Acknowledgment**

7 We would like to acknowledge ICF International, Rockville, Maryland, USA, through DHS  
8 program for permitting us to access the Tanzania SPA 2014-2015 dataset.

## 9 **Funding**

10 This research received no specific grant from any funding agency in the public, commercial or  
11 not-for-profit sectors.

## 12 **Competing interest**

13 None to declare.

## 14 **Provenance and peer review**

15 Not commissioned; externally peer reviewed.

## 16 **A data sharing statement**

17 The datasets generated during the current study are available from within the Demographic and  
18 Health Survey Program repository: <http://dhsprogram.com/data/available-datasets.cfm>



## 1 REFERENCES

- 1  
2  
3  
4  
5  
6  
7  
8  
9  
10  
11  
12  
13  
14  
15  
16  
17  
18  
19  
20  
21  
22  
23  
24  
25  
26  
27  
28  
29  
30  
31  
32  
33  
34  
35  
36  
37  
38  
39  
40  
41  
42  
43  
44  
45  
46  
47  
48  
49  
50  
51  
52  
53  
54  
55  
56  
57  
58  
59  
60
- 1 World Health Organization (WHO). Trends in Maternal Mortality : 1990 to 2015: Estimates by WHO, UNICEF, UNFPA, The World Bank and the United Nations Population Division. WHO. 2015. doi:ISBN 978 92 4 156514 1
  - 2 Wang H, Bhutta ZA, Coates MM, et al. Global, regional, national, and selected subnational levels of stillbirths, neonatal, infant, and under-5 mortality, 1980–2015: a systematic analysis for the Global Burden of Disease Study 2015. *Lancet* 2016;388:1725–74. doi:10.1016/S0140-6736(16)31575-6
  - 3 Wang H, Liddell CA, Coates MM, et al. Global, regional, and national levels of neonatal, infant, and under-5 mortality during 1990–2013: a systematic analysis for the Global Burden of Disease Study 2013. *Lancet* 2014;384:957–79. doi:10.1016/S0140-6736(14)60497-9
  - 4 World Health Organization (WHO). Maternal mortality fact sheet. 2015. Available from: <http://www.who.int/mediacentre/factsheets/fs348/en/> Accessed 10 Nov 2018.
  - 5 Say L, Chou D, Gemmill A, et al. Global causes of maternal death: a WHO systematic analysis. *Lancet Glob Heal* 2014;2:e323–33. doi:10.1016/S2214-109X(14)70227-X
  - 6 Lawn JE, Cousens S, Zupan J. 4 million neonatal deaths: When? Where? Why? *Lancet* 2005;365:891–900. doi:10.1016/S0140-6736(05)71048-5
  - 7 Alkema L, Chou D, Hogan D, et al. Global , regional , and national levels and trends in maternal mortality between 1990 and 2015 , with scenario-based projections to 2030 : a systematic analysis by the UN Maternal Mortality Estimation Inter-Agency Group. *Lancet*

- 1  
2  
3 1 2015;6736:1–13. doi:10.1016/S0140-6736(15)00838-7  
4  
5  
6 2 8 Lawn J, Mongi P, Cousens S. Opportunities for Africa’s Newborns: Africa’s newborns –  
7  
8 3 counting them and making them count. 2006. doi:10.1016/S0140-6736(06)91254-7  
9  
10  
11 4 9 National Bureau of Statistics (NBS) [Tanzania] and ICF Macro. 2011. Tanzania  
12  
13 Demographic and Health Survey 2010. Dar es Salaam, Tanzania: NBS and ICF Macro.  
14  
15 Available form:  
16  
17 6  
18 7 <https://dhsprogram.com/pubs/pdf/FR243/FR243%5B24June2011%5D.pdf> Accessed 10  
19  
20 8 Nov 2018.  
21  
22  
23  
24 9 10 Ministry of Health, Community Development, Gender, Elderly and Children  
25  
26 10 (MoHCDGEC) [Tanzania Mainland], Ministry of Health (MoH) [Zanzibar], National  
27  
28 Bureau of Statistics (NBS), Office of the Chief Government Statistician (OCGS), and ICF.  
29  
30 11 2016. Tanzania Demographic and Health Survey and Malaria Indicator Survey (TDHS-  
31  
32 12 MIS) 2015-16. Dar es Salaam, Tanzania, and Rockville, Maryland, USA: MoHCDGEC,  
33  
34 13 MoH, NBS, OCGS, and ICF; 2016. <https://dhsprogram.com/pubs/pdf/FR321/FR321.pdf>  
35  
36 14 Accessed 10 Nov 2018.  
37  
38  
39  
40  
41 16 11 Ministry of Health and Social Welfare (MoHSW). The National Road Map Strategic Plan  
42  
43 17 to Accelerate Reduction of Maternal, Newborn and Child Deaths in Tanzania (2008-15).  
44  
45 18 2008. Available from: <http://www.who.int/pmnch/countries/tanzaniamapstrategic.pdf>  
46  
47 19 Accessed 10 Nov 2018.  
48  
49  
50  
51 20 12 United Nations. The Sustainable Development Goals Report 2016. United Nations 2016.  
52  
53 21 doi:10.18356/3405d09f-en  
54  
55  
56  
57  
58  
59  
60

- 1  
2  
3 1 13 Salam RA, Mansoor T, Mallick D, et al. Essential childbirth and postnatal interventions  
4  
5 for improved maternal and neonatal health. *Reprod Health* 2014;11:S3. doi:10.1186/1742-  
6 2  
7 4755-11-S1-S3  
8 3  
9  
10  
11 4 14 Paxton A, Maine D, Freedman L, et al. The evidence for emergency obstetric care.  
12  
13 Published Online First: 2005. doi:10.1016/j.ijgo.2004.11.026  
14 5  
15  
16 6 15 Pearson L, Shoo R. Availability and use of emergency obstetric services : Kenya ,  
17  
18 Rwanda , Southern Sudan , and Uganda. 2005;:208–15. doi:10.1016/j.ijgo.2004.09.027  
19 7  
20  
21 8 16 World Health Organization (WHO), UNFPA, UNICEF and Mailman School of Public  
22  
23 Health. Averting Maternal Death and Disability (AMDD). Monitoring emergency  
24 9  
25 obstetric care: a handbook. WHO. 2009. Available from:  
26 10  
27 <http://www.who.int/reproductivehealth/publications/monitoring/9789241547734/en/>  
28 11  
29 Accessed 10 Nov 2018.  
30  
31  
32  
33  
34 13 17 Bhandari T, Dangal G. Emergency Obstetric Care: Strategy for Reducing Maternal  
35  
36 Mortality in Developing Countries. *Nepal J Obstet Gynaecol* 2014;9:8–16.  
37 14  
38 doi:10.3126/njog.v9i1.11179  
39 15  
40  
41  
42 16 18 Holmer H, Oyerinde K, Meara JG, et al. The global met need for emergency obstetric  
43  
44 care : a systematic review. 2015;:183–90. doi:10.1111/1471-0528.13230  
45 17  
46  
47 18 19 Ueno E, Adegoke AA. Skilled Birth Attendants in Tanzania : A Descriptive Study of  
48  
49 Cadres and Emergency Obstetric Care Signal Functions Performed. Published Online  
50 19  
51 First: 2014. doi:10.1007/s10995-014-1506-z  
52 20  
53  
54  
55 21 20 Banke-thomas A, Wright K, Sonoiki O, et al. Assessing emergency obstetric care  
56  
57

- 1  
2  
3 1 provision in low- and middle-income countries : a systematic review of the application of  
4  
5 2 global guidelines. 2016;1:1–13.  
6  
7  
8 3 21 United Republic of Tanzania (URT). National Emergency Obstetric and Newborn Care  
9  
10 4 (EmONC) Assessment. RCHS, Directorate of Preventive Services, United Republic of  
11  
12 5 Tanzania, Dar es Salaam. 2015.  
13  
14  
15  
16 6 22 Ministry of Health Community Development Gender Elderly and Children  
17  
18 7 (MOHCDGEC). The National Road Map Strategic Plan to Improve Reproductive,  
19  
20 8 Maternal, Newborn, Child and Adolescent Health in Tanzania (2016 - 2020) (One Plan II).  
21  
22 9 2016. Available from:  
23  
24 10 [http://globalfinancingfacility.org/sites/gff\\_new/files/documents/Tanzania\\_One\\_Plan\\_II.pdf](http://globalfinancingfacility.org/sites/gff_new/files/documents/Tanzania_One_Plan_II.pdf)  
25  
26 11 f Accessed 10 Nov 2018.  
27  
28  
29  
30  
31 12 23 Mkoka DA, Kiwara A, Goicolea I, et al. Governing the implementation of Emergency  
32  
33 13 Obstetric Care: experiences of Rural District Health Managers, Tanzania. BMC Health  
34  
35 14 Serv Res 2014;14:333. doi:10.1186/1472-6963-14-333  
36  
37  
38  
39 15 24 Koblinsky M, Moyer CA, Calvert C, et al. Quality maternity care for every woman,  
40  
41 16 everywhere: a call to action. Lancet 2016;388:2307–20. doi:10.1016/S0140-  
42  
43 17 6736(16)31333-2  
44  
45  
46  
47 18 25 Otolorin E, Gomez P, Currie S, et al. Essential basic and emergency obstetric and  
48  
49 19 newborn care: From education and training to service delivery and quality of care. Int J  
50  
51 20 Gynecol Obstet 2015;130:S46–53. doi:10.1016/j.ijgo.2015.03.007  
52  
53  
54  
55 21 26 Echoka E, Kombe Y, Dubourg D, et al. Existence and functionality of emergency  
56  
57  
58  
59  
60

- 1  
2  
3 1 obstetric care services at district level in Kenya: theoretical coverage versus reality. BMC  
4  
5 2 Health Serv Res 2013;13:113. doi:10.1186/1472-6963-13-113  
6  
7  
8 3 27 Alam M-U, Wichaidit W, Unicomb L, et al. Availability and Quality of Emergency  
9  
10 4 Obstetric and Newborn Care in Bangladesh. Am J Trop Med Hyg 2016;95:298–306.  
11  
12 5 doi:10.4269/ajtmh.15-0350  
13  
14  
15  
16 6 28 Roy L, Biswas TK, Chowdhury ME. Emergency obstetric and newborn care signal  
17  
18 7 functions in public and private facilities in Bangladesh. PLoS One 2017;12:e0187238.  
19  
20 8 doi:10.1371/journal.pone.0187238  
21  
22  
23  
24 9 29 Tecla SJ, Franklin B, David A, et al. Assessing facility readiness to offer basic emergency  
25  
26 10 obstetrics and neonatal care ( BEmONC ) services in health care facilities of west Pokot  
27  
28 11 county , Kenya. J Clin Simul Res 2017;7:25–39.  
29  
30  
31  
32 12 30 Measure Evaluation PIMA. Health Facility Readiness to Provide Emergency Obstetric  
33  
34 13 and Newborn Care in Kenya: Results of a 2014 Assessment of 13 Kenyan Counties with  
35  
36 14 High Maternal Mortality. Nairobi, Kenya: MEASURE Evaluation PIMA, University of  
37  
38 15 North Carolina at Chapel Hill. 2016. Available from:  
39  
40 16 <https://www.measureevaluation.org/resources/publications/tr-16-123> Accessed 10 Nov  
41  
42 17 2018.  
43  
44  
45  
46 18 31 Health Statistics and Information Systems, World Health Organization (WHO). Service  
47  
48 19 Availability and Readiness Assessment (SARA): an annual monitoring system for service  
49  
50 20 delivery: Reference Manual, Version 2.2. 2014. Available from:  
51  
52 21 [http://www.who.int/healthinfo/systems/sara\\_reference\\_manual/en/](http://www.who.int/healthinfo/systems/sara_reference_manual/en/) Accessed 10 Nov 2018.  
53  
54  
55  
56  
57  
58  
59  
60

- 1  
2  
3 1 32 Ministry of Health and Social Welfare (MoHSW) [Tanzania Mainland], Ministry of  
4 Health (MoH) [Zanzibar], National Bureau of Statistics (NBS), Office of the Chief  
5 Government Statistician (OCGS), and ICF International 2015. Tanzania Service Provision  
6 Assessm. 2015. Available from: <https://dhsprogram.com/pubs/pdf/SPA22/SPA22.pdf>  
7 Accessed 10 Nov 2018.
- 8  
9  
10 6 33 Bintabara D, Nakamura K, Seino K. Determinants of facility readiness for integration of  
11 family planning with HIV testing and counseling services: evidence from the Tanzania  
12 service provision assessment survey, 2014–2015. *BMC Health Serv Res* 2017;17:844.  
13 doi:10.1186/s12913-017-2809-8
- 14  
15  
16 10 34 Bintabara D, Mpondo BCT. Preparedness of lower-level health facilities and the  
17 associated factors for the outpatient primary care of hypertension: Evidence from  
18 Tanzanian national survey. *PLoS One* 2018;13:e0192942.  
19 doi:10.1371/journal.pone.0192942
- 20  
21  
22 14 35 Gage AJ, Ilombu O, Akinyemi AI. Service readiness, health facility management practices,  
23 and delivery care utilization in five states of Nigeria: a cross-sectional analysis. *BMC*  
24 *Pregnancy Childbirth* 2016;16:297. doi:10.1186/s12884-016-1097-3
- 25  
26  
27 17 36 Kozuki N, Oseni L, Mtimuni A, *et al.* Health facility service availability and readiness for  
28 intrapartum and immediate postpartum care in Malawi: A cross-sectional survey. *PLoS*  
29 *One* 2017;12:e0172492. doi:10.1371/journal.pone.0172492
- 30  
31  
32 20 37 O'Neill K, Takane M, Sheffel A, *et al.* Monitoring service delivery for universal health  
33 coverage: the Service Availability and Readiness Assessment. *Bull World Health Organ*  
34 2013;91:923–31. doi:10.2471/BLT.12.116798

- 1  
2  
3 1 38 World Health Organization (WHO). Trends in Maternal Mortality: 1990 to 2013:  
4  
5 2 Estimates by WHO, UNICEF, UNFPA, World Bank Group and the United Nations  
6  
7 3 Population Division. WHO. 2013. doi: ISBN: 978 92 4 150722 6  
8  
9  
10  
11 4 39 Wang W. Influence of Service Readiness on Us of Facility Delivery Care: A Study  
12  
13 5 Linking Health Facility Data and Population in Haiti [WP114]. *DHS Work Pap No 114*  
14  
15 6 2014.  
16  
17  
18 7 40 Roy L, Biswas TK, Chowdhury ME. Emergency obstetric and newborn care signal  
19  
20 8 functions in public and private facilities in Bangladesh. *PLoS One* 2017;**12**:e0187238.  
21  
22 9 doi:10.1371/journal.pone.0187238  
23  
24  
25  
26 10 41 Ghulmiyyah L, Sibai B. Maternal Mortality From Preeclampsia/Eclampsia. *Semin*  
27  
28 11 *Perinatol* 2012;**36**:56–9. doi:10.1053/j.semperi.2011.09.011  
29  
30  
31  
32 12 42 Mselle LT, Moland KM, Mvungi A, *et al*. Why give birth in health facility? Users' and  
33  
34 13 providers' accounts of poor quality of birth care in Tanzania. *BMC Health Serv Res*  
35  
36 14 2013;**13**:174. doi:10.1186/1472-6963-13-174  
37  
38  
39  
40 15 43 Mkoka DA, Goicolea I, Kiwara A, *et al*. Availability of drugs and medical supplies for  
41  
42 16 emergency obstetric care: experience of health facility managers in a rural District of  
43  
44 17 Tanzania. *BMC Pregnancy Childbirth* 2014;**14**:108. doi:10.1186/1471-2393-14-108  
45  
46  
47 18 44 Sikika. Medicines and medical supplies availability report. Using absorbent gauze  
48  
49 19 availability survey as an entry point. A case of 71 districts and 30 health facilities across  
50  
51 20 mainland Tanzania. Sikika. 2011. Available from: [http://sikika.or.tz/wp-](http://sikika.or.tz/wp-content/uploads/2013/09/medicines-and-medical-and-supply-availability-report.pdf)  
52  
53 [content/uploads/2013/09/medicines-and-medical-and-supply-availability-report.pdf](http://sikika.or.tz/wp-content/uploads/2013/09/medicines-and-medical-and-supply-availability-report.pdf)  
54  
55  
56  
57  
58  
59  
60

- 1  
2  
3 1 Accessed 10 Nov 2018.  
4  
5  
6 2 45 Busari J. Comparative analysis of quality assurance in health care delivery and higher  
7  
8  
9 3 medical education. *Adv Med Educ Pract* 2012;:121. doi:10.2147/AMEP.S38166  
10  
11  
12 4 46 de Jonge V, Nicolaas JS, van Leerdam ME, *et al*. Overview of the quality assurance  
13  
14 5 movement in health care. *Best Pract Res Clin Gastroenterol* 2011;25:337–47.  
15  
16 6 doi:10.1016/j.bpg.2011.05.001  
17  
18  
19 7 47 Ministry of Health and Social Welfare (MoHSW). in-Depth Assessment of the Medicines  
20  
21 8 Supply System in Tanzania. WHO. 2008. Available from:  
22  
23 9 <http://apps.who.int/medicinedocs/documents/s16503e/s16503e.pdf> Accessed 10 Nov 2018.  
24  
25  
26  
27 10 48 Lewis G. Beyond the Numbers: reviewing maternal deaths and complications to make  
28  
29 11 pregnancy safer. *Br Med Bull* 2003;67:27–37. doi:10.1093/bmb/ldg009  
30  
31  
32  
33 12 49 Kongnyuy EJ, van den Broek N. The difficulties of conducting maternal death reviews in  
34  
35 13 Malawi. *BMC Pregnancy Childbirth* 2008;8:42. doi:10.1186/1471-2393-8-42  
36  
37  
38 14 50 Ministry of Health and Social Welfare (MoHSW). The National Road Map Strategic Plan  
39  
40 15 To Accelerate Reduction of Maternal, Newborn and Child Deaths in Tanzania 2008 -  
41  
42 16 2015. 2008. Available from:  
43  
44 17 <http://www.who.int/pmnch/countries/tanzaniamapstrategic.pdf> Accessed 10 Nov 2018.  
45  
46  
47  
48 18 51 Wagaarachchi PT, Graham WJ, Penney GC, *et al*. Holding up a mirror: changing obstetric  
49  
50 19 practice through criterion-based clinical audit in developing countries. *Int J Gynecol*  
51  
52 20 *Obstet* 2001;74:119–30. doi:10.1016/S0020-7292(01)00427-1  
53  
54  
55  
56 21 52 Sorensen BL, Elsass P, Nielsen BB, *et al*. Substandard emergency obstetric care - a



- 1  
2  
3 1 confidential enquiry into maternal deaths at a regional hospital in Tanzania. *Trop Med Int*  
4  
5 2 *Heal* 2010;**15**:894–900. doi:10.1111/j.1365-3156.2010.02554.x  
6  
7  
8 3 53 Gupta KS, Rokade V. Importance of Quality in Health Care Sector. *J Health Manag*  
9  
10 4 2016;**18**:84–94. doi:10.1177/0972063415625527  
11  
12  
13  
14 5 54 Manzi F, Schellenberg JA, Hutton G, *et al.* Human resources for health care delivery in  
15  
16 6 Tanzania: a multifaceted problem. *Hum Resour Health* 2012;**10**:3. doi:10.1186/1478-  
17  
18 7 4491-10-3  
19  
20  
21  
22 8 55 Afnan-Holmes H, Magoma M, John T, *et al.* Tanzania’s Countdown to 2015: An analysis  
23  
24 9 of two decades of progress and gaps for reproductive, maternal, newborn, and child health,  
25  
26 10 to inform priorities for post-2015. *Lancet Glob Heal* 2015;**3**:e396–409.  
27  
28 11 doi:10.1016/S2214-109X(15)00059-5  
29  
30  
31  
32 12 56 Ministry of Health and Social Welfare (MoHSW). Health Sector Public Expenditure  
33  
34 13 Review, 2010/11. 2012. [https://www.hfgproject.org/health-sector-public-expenditure-](https://www.hfgproject.org/health-sector-public-expenditure-review-201011/)  
35  
36 14 [review-201011/](https://www.hfgproject.org/health-sector-public-expenditure-review-201011/) Accessed 10 Nov 2018.  
37  
38  
39  
40 15  
41  
42  
43  
44  
45  
46  
47  
48  
49  
50  
51  
52  
53  
54  
55  
56  
57  
58  
59  
60

1  
2  
3 **1 Figure titles/legend**  
4  
5

6 **2 Title; Figure 1 Percentage score of the three domains of readiness to provide Basic**  
7  
8 **3 Emergency Obstetric and Newborn Care services**  
9

10  
11  
12 **4 Title; Figure 2 Overall readiness score for providing Basic Emergency Obstetric and**  
13  
14 **5 Newborn Care according to the type of facility and managing authority**  
15

16  
17 **6 Legend 2 Box shows the limits of 25 and 75% percentile. Horizontal line inside the box**  
18  
19 **7 shows the median value. The bar shows the low and upper limits of 95% confidence**  
20  
21 **8 interval. The dots show outliers**  
22  
23

24 9

25  
26 10  
27

28  
29 11  
30

31 12  
32

33 13  
34

35  
36 14  
37  
38  
39  
40  
41  
42  
43  
44  
45  
46  
47  
48  
49  
50  
51  
52  
53  
54  
55  
56  
57  
58  
59  
60

1  
2  
3  
4  
5  
6  
7  
8  
9  
10  
11  
12  
13  
14  
15  
16  
17  
18  
19  
20  
21  
22  
23  
24  
25  
26  
27  
28  
29  
30  
31  
32  
33  
34  
35  
36  
37  
38  
39  
40  
41  
42  
43  
44  
45  
46  
47  
48  
49  
50  
51  
52  
53  
54  
55  
56  
57  
58  
59  
60



**Reported items in each domain**

127x76mm (300 x 300 DPI)

1  
2  
3  
4  
5  
6  
7  
8  
9  
10  
11  
12  
13  
14  
15  
16  
17  
18  
19  
20  
21  
22  
23  
24  
25  
26  
27  
28  
29  
30  
31  
32  
33  
34  
35  
36  
37  
38  
39  
40  
41  
42  
43  
44  
45  
46  
47  
48  
49  
50  
51  
52  
53  
54  
55  
56  
57  
58  
59  
60

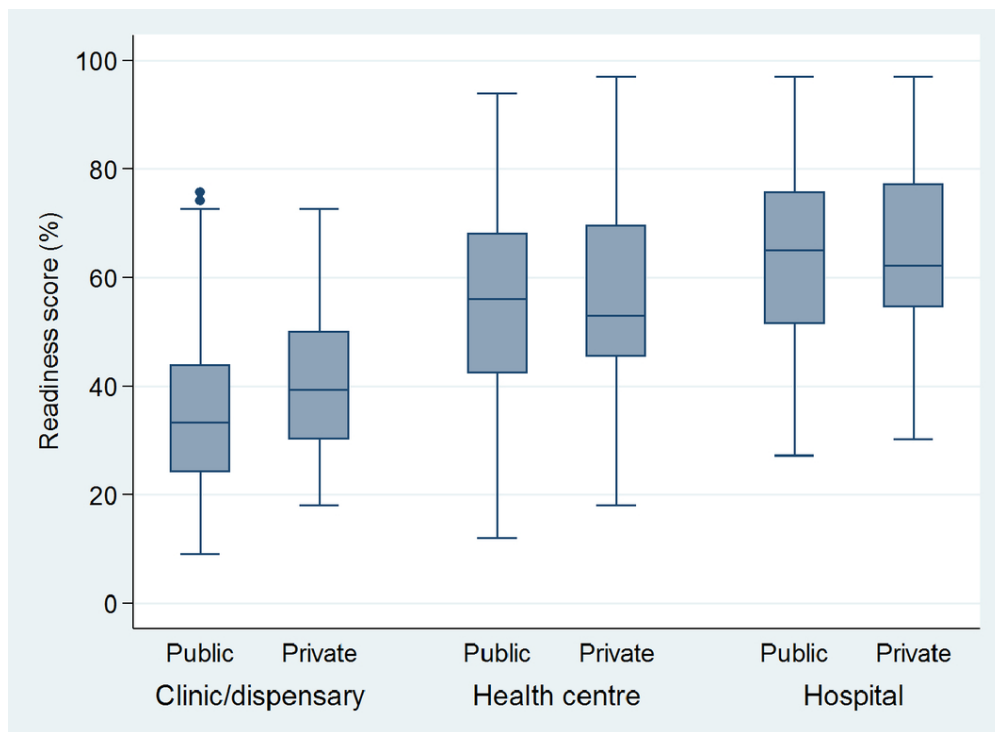

89x65mm (300 x 300 DPI)

**STROBE 2007 (v4) Statement—Checklist of items that should be included in reports of *cross-sectional studies***

| Section/Topic             | Item # | Recommendation                                                                                                                                                                       | Reported on page # |
|---------------------------|--------|--------------------------------------------------------------------------------------------------------------------------------------------------------------------------------------|--------------------|
| <b>Title and abstract</b> | 1      | (a) Indicate the study’s design with a commonly used term in the title or the abstract                                                                                               | Page 1, and 2      |
|                           |        | (b) Provide in the abstract an informative and balanced summary of what was done and what was found                                                                                  | Page 2             |
| <b>Introduction</b>       |        |                                                                                                                                                                                      |                    |
| Background/rationale      | 2      | Explain the scientific background and rationale for the investigation being reported                                                                                                 | Page 5-6           |
| Objectives                | 3      | State specific objectives, including any prespecified hypotheses                                                                                                                     | Page 6             |
| <b>Methods</b>            |        |                                                                                                                                                                                      |                    |
| Study design              | 4      | Present key elements of study design early in the paper                                                                                                                              | Page 7             |
| Setting                   | 5      | Describe the setting, locations, and relevant dates, including periods of recruitment, exposure, follow-up, and data collection                                                      | Page 7-8           |
| Participants              | 6      | (a) Give the eligibility criteria, and the sources and methods of selection of participants                                                                                          | Page 7             |
| Variables                 | 7      | Clearly define all outcomes, exposures, predictors, potential confounders, and effect modifiers. Give diagnostic criteria, if applicable                                             | Page 8-10          |
| Data sources/ measurement | 8*     | For each variable of interest, give sources of data and details of methods of assessment (measurement). Describe comparability of assessment methods if there is more than one group | Page 8-10          |
| Bias                      | 9      | Describe any efforts to address potential sources of bias                                                                                                                            | Page 11-2          |
| Study size                | 10     | Explain how the study size was arrived at                                                                                                                                            | Page 7             |
| Quantitative variables    | 11     | Explain how quantitative variables were handled in the analyses. If applicable, describe which groupings were chosen and why                                                         | Page 11            |
| Statistical methods       | 12     | (a) Describe all statistical methods, including those used to control for confounding                                                                                                | Page 11-2          |
|                           |        | (b) Describe any methods used to examine subgroups and interactions                                                                                                                  | Page 11-2          |
|                           |        | (c) Explain how missing data were addressed                                                                                                                                          | N/A                |
|                           |        | (d) If applicable, describe analytical methods taking account of sampling strategy                                                                                                   | Page 11            |
|                           |        | (e) Describe any sensitivity analyses                                                                                                                                                | N/A                |
| <b>Results</b>            |        |                                                                                                                                                                                      |                    |

|                          |     |                                                                                                                                                                                                              |                     |
|--------------------------|-----|--------------------------------------------------------------------------------------------------------------------------------------------------------------------------------------------------------------|---------------------|
| Participants             | 13* | (a) Report numbers of individuals at each stage of study—eg numbers potentially eligible, examined for eligibility, confirmed eligible, included in the study, completing follow-up, and analysed            | Page 12 and Table 1 |
|                          |     | (b) Give reasons for non-participation at each stage                                                                                                                                                         | N/A                 |
|                          |     | (c) Consider use of a flow diagram                                                                                                                                                                           | N/A                 |
| Descriptive data         | 14* | (a) Give characteristics of study participants (eg demographic, clinical, social) and information on exposures and potential confounders                                                                     | Page 12 and Table 1 |
|                          |     | (b) Indicate number of participants with missing data for each variable of interest                                                                                                                          | N/A                 |
| Outcome data             | 15* | Report numbers of outcome events or summary measures                                                                                                                                                         | Page 14-8           |
| Main results             | 16  | (a) Give unadjusted estimates and, if applicable, confounder-adjusted estimates and their precision (eg, 95% confidence interval). Make clear which confounders were adjusted for and why they were included | Page 18 and Table 4 |
|                          |     | (b) Report category boundaries when continuous variables were categorized                                                                                                                                    | Table 1             |
|                          |     | (c) If relevant, consider translating estimates of relative risk into absolute risk for a meaningful time period                                                                                             | N/A                 |
| Other analyses           | 17  | Report other analyses done—eg analyses of subgroups and interactions, and sensitivity analyses                                                                                                               | N/A                 |
| <b>Discussion</b>        |     |                                                                                                                                                                                                              |                     |
| Key results              | 18  | Summarise key results with reference to study objectives                                                                                                                                                     | Page 20-3           |
| Limitations              | 19  | Discuss limitations of the study, taking into account sources of potential bias or imprecision. Discuss both direction and magnitude of any potential bias                                                   | Page 24             |
| Interpretation           | 20  | Give a cautious overall interpretation of results considering objectives, limitations, multiplicity of analyses, results from similar studies, and other relevant evidence                                   | Page 24             |
| Generalisability         | 21  | Discuss the generalisability (external validity) of the study results                                                                                                                                        | Page 24             |
| <b>Other information</b> |     |                                                                                                                                                                                                              |                     |
| Funding                  | 22  | Give the source of funding and the role of the funders for the present study and, if applicable, for the original study on which the present article is based                                                | N/A                 |

\*Give information separately for cases and controls in case-control studies and, if applicable, for exposed and unexposed groups in cohort and cross-sectional studies.

**Note:** An Explanation and Elaboration article discusses each checklist item and gives methodological background and published examples of transparent reporting. The STROBE checklist is best used in conjunction with this article (freely available on the Web sites of PLoS Medicine at <http://www.plosmedicine.org/>, Annals of Internal Medicine at <http://www.annals.org/>, and Epidemiology at <http://www.epidem.com/>). Information on the STROBE Initiative is available at [www.strobe-statement.org](http://www.strobe-statement.org).
